# Supplementary material for: Existence of a continental-scale river system in eastern Tibet during the late Cretaceous–early Palaeogene
Source: PubMed Central journal article supplement (PMC8668954; doi:10.1038/s41467-021-27587-9), 2021-12-13
Supplement: 41467_2021_27587_MOESM2_ESM.pdf [file 41467_2021_27587_MOESM2_ESM.pdf]

## Peer Review File

---

Existence of a continental-scale river system in eastern Tibet during the late Cretaceous–early Palaeogene

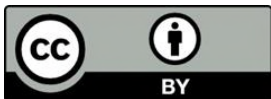

**Open Access** This file is licensed under a Creative Commons Attribution 4.0 International License, which permits use, sharing, adaptation, distribution and reproduction in any medium or format, as long as you give appropriate credit to the original author(s) and the source, provide a link to the Creative Commons license, and indicate if changes were made. In the cases where the authors are anonymous, such as is the case for the reports of anonymous peer reviewers, author attribution should be to 'Anonymous Referee' followed by a clear attribution to the source work. The images or other third party material in this file are included in the article's Creative Commons license, unless indicated otherwise in a credit line to the material. If material is not included in the article's Creative Commons license and your intended use is not permitted by statutory regulation or exceeds the permitted use, you will need to obtain permission directly from the copyright holder. To view a copy of this license, visit <http://creativecommons.org/licenses/by/4.0/>.

## Reviewers' Comments:

Reviewer #1:

Remarks to the Author:

The evolution of large river is always a hot topic in earth science and attract huge interest. This study provide the traditional provenance results of the Upper Cretaceous to Paleocene in four basins, eastern Tibet, including petrographic modal counting and heavy mineral analysis for 22 samples and detrital zircon U-Pb ages for 16 samples. The results show the provenance similarities between the samples, the Songpan-Ganzi, Yidun, and Yangtze terranes, and the upper Jinsha, Min and Yalong rivers sand. Based on the provenance interpretation, the authors believed that there was a long-lived continental-scaled river system flowed into the Neo-Tethyan Ocean which generated a low-relief landscape in eastern Tibet. However, the provenance analysis and drainage reconstruction is questionable and thus conclusions in the manuscript are not reasonable. Moreover, there are several similar studies published before which eclipsed the significance of this study, not to mention several big weaknesses. Thus, I have to reject the manuscript for publication in Nature Communications.

Major Comments:

(1) To track the provenance across continents for a specific geological time period (e.g., late Cretaceous to Paleocene), comparisons have to be made amongst such equivalent-aged sedimentary strata. The authors should give the age constraints of the strata as accurate as possible. We all know that the Upper Cretaceous to Paleocene in these studied basins are based on mostly by the ostracods that identified about 40 years ago, which is not robust age constraint. Although the authors provide the youngest single detrital zircon ages (80, 90, 76 Ma for Sample CX-34, CX-25, CX-36, respectively) of the Chuxiong Basin, the single zircon age is insufficient to tell the maximum depositional age (MDA). About the MDA, pls refers to the following paper.

Sharman and Malkowski, 2020. Needles in a haystack: Detrital zircon U-Pb ages and the maximum depositional age of modern global sediment. *Earth-Science Reviews* 203, 103109.

<https://doi.org/10.1016/j.earscirev.2020.103109>

Moreover, the samples of the Simao Basin are from the Denghei Formation, which is believed to be deposited during Paleocene to late Eocene. The Upper Cretaceous to Lower Paleocene in the Simao Basin is the Mengyejing Formation which have robust radioactive and magnetostratigraphic constraints (112~>63 Ma, Yan M. et al., 2021, *Science China Earth Science*; Wang L. et al., 2015, *Cretaceous Research*). Please use provenance similarities to link continents and restore paleo-drainage systems only when the sedimentary strata are formed within a same time. Without correlation between the coeval strata, it is not convincible that the large-scale river can be flow into Simao and further south.

(2) The depositional environment is essential to reconstruct the paleo-river system. In Supplementary Information Xichang Basin section, for the Xiaoba and Leidashu Formations, Deng et al. (2018, ref. 16) never proposed a meandering river but a fluvial and shallow-lacustrine environment. Also, ref. 25 indicate a lacustrine environment. Together with the occurrence of evaporites, I think the lacustrine environment is more reasonable. In Chuxiong Basin section, I strongly doubt the interpretation of the exorheic lake because the thick evaporites are occurred in the Jiangdihe Formation. Similarly, the Upper Cretaceous Mengyejing Formation developed several hundred meters of evaporites, indicative of an endorheic basin. How to understand the drainage pattern when the large river flow into the Chuxiong and Simao Lake?

(3) Provenance interpretation

a, About the potential sources. I doubt if you correctly plot the age distribution of the Yangtze terrane. Because all 1191 zircon ages in figure 3 and extended data figures 4&6 don't show a prominent age peak of 750-1000 Ma which is believed to be a diagnostic feature of the Yangtze. I tried to find the paper you cited (refs. 14& 30) and found that the zircon ages in these papers are from the Early Paleozoic. So why the age peaks at ca. 150 Ma and 220 Ma occur? I don't know the specific samples of the 1191 ages although you mentioned they were from the pre-late Cretaceous strata. Thus, the relationship between the ages<200 Ma and the Yangtze terrane need to be further proved.

b, line 171-172, We cannot interpret the provenance just based on the age peaks. Why the Lhasa Terrane just simply provide the late Cretaceous zircons to the Chuxiong Basin, not conclude the other age populations? If you plot the Lhasa in the MDS diagram, you will find the Lhasa plot apart from

your samples.

c, In the MDS plot (Figure 5b), clearly, the Min River and Yalong River plot apart from the samples. The age peaks of Yalong River sand are different from the samples and Songpan-Ganzi. Only Upper Jinsha river plot closer to the samples. So how do you explain your drainage reconstruction?

#### (4) Drainage system

As mentioned above, for the reasons of the depositional environment and provenance interpretation, I disagree with the idea that a large-scale river system that connect the all the so-called exorheic basins although I agree somehow a south-flowing river exists. Specifically, the Chuxiong and Simao are two endorheic basins with several hundred meters of evaporites. Perhaps, the river just stop when it flowed into these two basins. Even if a trans-continental river system flowed to the Neo-Tethyan Ocean, about the river course more evidence should be provided, e.g., provenance correlation to the west Burma? And to Khorat Basin? Cai F.L. et al. (2020, GSAB) indicated that the Upper Cretaceous-Eocene strata are mainly sourced from the western Myanmar Arc with detrital zircon age peaks of 100-60 Ma. This is totally different with the coeval strata of the eastern Tibetan basins in this study. Thus, in the reconstruction map Figure. 4, I strongly doubt the river flowed Simao via Myanmar to the Neo-Tethyan Ocean. Actually, the paleocurrent of the Simao Basin would suggest a connection with the Khorat basin (See Yan M.D., et al., 2021, and references therein). More importantly, large river system in the Late Cretaceous flowed to the Neo-Tethyan Ocean had been proposed by Yan Maodu et al., 2021, Science China Earth Science. So it is not the authors who claimed that they proposed it for the first time. I found that there are several papers proposed a large river system prior to the collision between India and Asia, e.g., Deng et al. (2018, ref. 16); Wang L.C., et al. 2020, Palaeo-3; Yan M., et al., 2021.

#### (5) Data and methodology

1), Petrography part. The authors should tell the readers what kind of method you use when you do modal analysis. Usually, sedimentary geologists use the Gazzi-Dickinson method (Ingersoll et al., 1984). And all ternary diagrams should cite the original references.

In Extended data Figure 2, you use Lc to represent the carbonatite lithic, however, the Ls was used in the Table S2. Moreover, I strongly doubt the high percentage of carbonatite lithic in the samples, if yes, why don't you count these into the Lv?

2), For all 22 samples for petrographic and heavy mineral analysis, I suggest the authors give a table that contain the GPS and stratigraphic information (I can't tell which formation and basin of some samples belong to, e.g., CX-29, CX-01, CX08). In Extended data Figure 1, the authors should locate the heavy mineral samples in the stratigraphic columns of the Xichang, Huili, and Chuxiong basins.

3) Detrital zircon geochronology part. More information should be provided to let the readers examine the reliability of your data. What are the dating results of your age external standards? And how do these results compared to the suggested age values? So you should provide the dating results the standard zircons. In addition, relevant citations should be given regarding external standards. The representative CL images of detrital zircons especially the ones with young ages (<200 Ma in this area) is very important. Because in my opinion, these young zircons are mostly from local source.

4) The method of MDS is not sufficiently explained. (a) How the MDS map was generated? (b) Which metric do you choose when you plot the MDS, e.g., likeness, similarity.....?

5) Line 461-464, the K-S test p-value is not recommended to use. Use of the K-S or Kuiper test p-values for quantitative similarity analysis of detrital geochronological data sets is likely to lead to incorrect conclusions (Satkoski et al., 2013, GSA Bulletin; Vermeesch, 2013; Saylor and Sundell, 2016, Geosphere). As noted by Vermeesch (2013), the D or V values provide more robust assessment of the dissimilarity between samples than do p-values. Thus, the D or V values of K-S or Kuiper tests are suggested to use.

#### Minor Comments:

1, Line 103, Yangtze is believed to be a part of South China block, why did you show a different concept? The same as in Figure 1a.

2, Line 125-128, I can't understand why the late Cretaceous-early Paleogene strata could represent the youngest terrestrial clastic deposits? At least the Lower Cretaceous in these basins are terrestrial clastic rocks.

3, Line 131, the same as the previous comment, actually the Upper Cretaceous evaporites developed

in the SW Sichuan, Xichang, Chuxiong, and Simao Basins (Liu Shugen et al., 2019, Journal of Chengdu University of Technology, v.46, No. 1, 1-28; and references therein). Especially, thick evaporites were developed in the Chuxiong and Simao Basin (Liu Chenglin et al., 2018, Ore Geology Reviews).

4, Line 135-137, about the depositional environment interpretation, pls see my comments above.

5, Line 204-205, during K2-E1, the global sea level was gradually rose from ca.80 Ma to 60-50 Ma, and fell since 50 Ma (Miller et al., 2005, Science, 10.1126/science.1116412). Thus, it is not stable. How to understand?

6, Actually, Deng B. et al.(2018, GSAB) published many detrital zircon ages of the Upper Cretaceous-Paleocene in Sichuan, Chuxiong basins. I suggest the authors should compile all published detrital zircon ages together with this study to do provenance analysis.

7, Figure. 1, where is the Sichuan Basin?

8, Supplementary Information line 41-42, very thick evaporites were developed in the Upper Cretaceous Chuxiong and Simao Basin. Thus, it is not an indication of river discharge but an endorheic lake.

9, Extended figure 4a and 4b, all the references are not incorrect. I can't find any mentioned samples in these cited papers (ref 31, 47, and 25). For the ref. 25, maybe you want to refer to ref. 14 (Chen Y., et al., 2017, EPSL). However, the 272 zircon ages from ref. 14 belong to the Denghe Formation, which was assigned a Paleocene-late Eocene in age based on the fossils. Thus, I doubt whether it is reasonable to correlate to the Simao basin in this manuscript.

The part of Landscape evolution simulation is beyond my expertise, so I can't give any comments about it.

Reviewer #2:

Remarks to the Author:

Dear Authors and Editor(s),

Thank you for the opportunity to review "Existence of a continental-scale river system in eastern Tibet during the late Cretaceous-early Palaeogene" by Zhao and co-authors. This study reports provenance data (detrital zircon and sandstone petrography) from Cretaceous-Eocene sedimentary basins that are located along the southeast margin of the Tibetan Plateau. The authors observe that the provenance data is very consistent between basins and back up these observations with statistical methods that are mainly presented in the supplementary figures. To explain these data, the authors argue that there was likely a continent-scale river that connected the basins and drained to the Neo-Tethyan Ocean, which separated India from Eurasia prior to India-Asia collision. The authors note that this interpretation also has relevance to the debate over the low-relief, incised landscapes that are located along the southeast margin of the Tibetan Plateau. This aspect of the research will likely be the most broadly relevant and controversial aspect. Several dynamic models for Tibetan Plateau growth invoke different mechanisms for formation of the low-relief landscapes. This, coupled with the inherent interestingness of ancient, continental-scale rivers, make this research exciting and broadly relevant. As I am an expert on detrital zircon geochronology and the tectonics of the Tibetan Plateau, I chose to focus on these aspects for my review. In my opinion, the provenance data are robust and well supported by statistical methods. I would encourage the authors to include some more discussion of their comparison between source terrane signatures and basin signatures. A key point that must be proven is that the source areas are distinguishable based on their detrital zircon age spectra whereas all the sampled basins are not, indicating mixing by a large river system. The supplementary figures were very helpful to convince me of the validity of the argument, yet they are sparsely discussed or referenced in the main text.

The authors also present a landscape evolution model that they link with their thermal modeling results. They claim that it illustrates the plausibility of the continent-scale river along the southeastern Tibetan Plateau because faster exhumation rates would be expected in the upstream reaches of the drainages. This seems plausible to me, but the authors should also emphasize that the Lhasa Terrane hosted an active, Cordilleran orogenic system at the time of deposition of the samples. It has

previously been likened to the modern Andes. It should not be implied that fluvial drainage networks were solely responsible for the cooling of samples further toward the interior of the Tibetan Plateau, as the tectonic activity in this region undoubtedly affected these results.

Respectfully,

Dr. Andrew Laskowski

Assistant Professor

Department of Earth Sciences

Montana State University

Reviewer #3:

Remarks to the Author:

Comments to 'Existence of a continental-scale river system in eastern Tibet during the late Cretaceous–early Paleogene' By Zhao et al.

Based on new petro-stratigraphy, heavy-mineral analysis, and detrital zircon U-Pb studies on late Cretaceous–early Paleogene sediments from the east margin of Tibet, Zhao et al. proposed a novel continental-scale river flowing southwestward to the Neo-Tethyan Ocean along the eastern Tibet in the late Cretaceous–early Paleogene, and used this river to explain the formation of low-relief in the east margin of Tibet. The topic of this study is of broad interest for geologists, and the proposed model is significant different with previous models, which seems valuable for publication in Nature Communications. However, there are some important unclears in the MS, which should be addressed before acceptance.

1. The authors claimed that the sediments they studied are Late Cretaceous–Early Paleogene, but did not provide solid evidences to support, although I noticed in the Supplementary Information they have shown some fossils evidence, but these are not enough. Some recent studies have shown that the age of sediments in this area is significant older than the traditional fossils suggested, e.g., Gourbet et al. (2017). Therefore, if the ages of these sediments are wrong, the river story could be changed.

2. The authors argued that the K2–E1 sediments were not deposited in spatially separated endorheic basins based on the lack of coarse-grained sediments and thick evaporites. However, these are not strong evidence to preclude this possibility. It is very likely that these sediments were derived locally by recycling from surrounding older rocks. For example, the Nangqian and Gonjo basins in eastern Tibet show similar lithologies as the K2–E1 sediments by the authors, but studies have shown that the two basins were sourced locally (Horton et al., 2002). The authors also suggested that the low-relief could not be severed as physiographic barriers for endorheic basins. However, endorheic basin can be formed in any landscape with local structures, e.g., normal fault.

3. The evidence of lack K2–E1 terrestrial deposits in the South China Sea to against a paleo-river flowed to the Proto-Pacific Ocean is not the truth. For example, as shown in the Fig. 3 of Clift et al., 2006 EPSL, the Paleogene sediments are very thick in the South China Sea. So the authors have to find strong evidences to support why a continental-scale river was flowed to the Neo-Tethyan Ocean rather than the Proto-Pacific Ocean.

4. The biggest problem of this MS is the Fig. 4, which is inconsistent with the tectonic background. The authors refer the reference of Muller et al. (2016) for the late Cretaceous paleogeography reconstruction, but the map shown in Fig. 4a is inconsistent with geological evidence: The Indochina and Sibumasu, which locate southwest of the South China Block, have amalgamated to South China in Late Triassic, and the Lhasa has collided with Qiangtang in the early Cretaceous, so it is impossible that a Neo-Tethyan Ocean was still existed between South China and Indochina as shown in Fig. 4a. Therefore, if a southwest flow river to the Neo-Tethyan Ocean existed in the Late Cretaceous, more evidence from the Indochina and Sibumasu terranes must be shown, currently the westernmost basin

shown in the MS is the Simao Basin, which cannot preclude the possibility that the river flowed to the South China Sea as previous model suggested.

1 **Response letter**

2 In this letter we will provide our detailed response (in blue text) to the comments of the editor  
3 and the three reviewers (in black) and explain all changes performed on the manuscript.  
4

5 **Response to the point raised by the Associate Editor**

6 *Regarding the "additional evidence that supports the proposed route (of the palaeo-river) to*  
7 *the Neo-Tethyan Ocean", we would like to mention four lines of additional evidence:*  
8

9 **Reply:**

10 (1) In the Simao–Khorat Basins (located south of the Chuxiong Basin in Indochina; Fig. 1),  
11 published data sets on sedimentology proxies, biomarkers, element geochemistry, and  
12 isotopic geochemistry consistently indicate that late Cretaceous to early Paleogene  
13 evaporites are mainly of marine origin, which has generally been interpreted as the result  
14 of a transgression of the Tethys ocean (e.g., Hite and Japakasetr, 1979; El Tabakh et al.,  
15 1999; Zhang et al., 2013; Liu et al., 2018; Qin et al., 2020; Wang et al., 2021). This  
16 suggests that the Simao–Khorat Basins was very close to the ocean at that time. Moreover,  
17 these basins pertain to Tethyan Tectonic Domain during the late Cretaceous–early  
18 Paleogene (Yan et al., 2021; Liu et al., 2018). Thus, a more reasonable interpretation is  
19 that the proposed continental-scale river system discharged into the Neo-Tethyan Ocean.  
20 We have supplemented this evidence on **lines 219–226** of the revised manuscript.

21 (2) A new compilation of detrital zircon ages from the studied basins and three other basins  
22 farther south (Simao, Muang Xai, and Khorat) are very similar and provide additional  
23 support for a through-going sediment transport system (see new Fig. S8 in Supplementary  
24 Information) (Carter et al., 1999; Wang et al., 2014; Wang et al., 2017; Chen et al., 2017;  
25 Wang et al., 2020; this study). Specifically, late Cretaceous samples from the Muang Xai  
26 and Khorat basins show strikingly consistent Precambrian peaks at 2400–2600 Ma, 1900–  
27 1600 Ma, and 900–600 Ma (Fig. S8), strongly suggesting the Songpan-Ganzi and Upper  
28 Yangtze terranes as main source areas (revised manuscript, **lines 212–216**).

29 (3) In the current depositional area of the Red River (the Yinggehai-Song Hong Basin of the  
30 South China Sea), many boreholes have revealed that the Cenozoic deposits at the bottom  
31 of borehole are not older than late Eocene (~37 Ma) (see Figure 4 in papers of Clift et al.,  
32 2006 (GRL) and Clift et al., 2008; Lei et al., 2011; Wang et al., 2019). Regionally, the  
33 Proto-South China Sea during the late Cretaceous to early Cenozoic period is  
34 characterized by a series of deep, rapidly-subsiding small-scale rift basins under back-arc  
35 extension (see review of Morley et al., 2012). For example, in the Pearl River Basin in the  
36 eastern South China Sea, the upper Cretaceous strata are characterized by a dominance of  
37 zircons with ages clustering around the late Jurassic–Cretaceous, which has been  
38 interpreted to be from nearby continental arcs (see Figure 6 in Shao et al., 2017, and  
39 Figure 10 in He et al., 2020). These observations clearly imply that there was no  
40 large-scale drainage system that linked eastern Tibet with the proto-South China Sea prior  
41 to late Eocene time (revised manuscript, **lines 216–219**).

42  
43 (4) Abundant low-relief landscape patches are preserved on both sides of the present-day  
44 Ailaoshan-Red River shear zone (e.g., Schoenbohm et al., 2004; Clark et al., 2005; Fig.1;  
45 see Figure 1 of Wang et al., 2017) suggesting that there was a regional low-relief surface  
46 from the Tibetan hinterland to the sea, which partly supports our interpretation that a  
47 paleo-river flowed southwards into the Neo-Tethyan Ocean before the fault system

48 became active ~35 Ma ago (e.g., Scharer et al., 1994; Gilley et al., 2003). In other words,  
49 if there was a paleo-Red river connecting the Tibetan hinterland with the Proto-South  
50 China Sea before Miocene surface uplift in eastern Tibet (as proposed by Clift et al., 2006,  
51 GRL), its course must have been established after the formation of the regional low-relief  
52 surface. We have included this evidence on **lines 250–254** of the revised manuscript.

53  
54 (5) Recently, Cai et al. (2020) and Zhang et al. (2021) have clearly shown that the Upper  
55 Cretaceous–Early Eocene deposits in the Sibumasu–Burmese region are of proximal  
56 origin (see Figure 10 in Cai et al., 2020, and Figure 13b in Zhang et al., 2021) based on  
57 detrital zircon data, thus excluding the possibility that there was a west-flowing  
58 continental-scale river system to the Sibumasu–Burmese region during the late  
59 Cretaceous–early Palaeogene.

#### 61 **References:**

- 62 Cai, F., Ding, L., Zhang, Q., Orme, D. A., & Sein, K. Initiation and evolution of forearc basins  
63 in the central myanmar depression. *Geol Soc Am Bull.* **132**, 5–6 (2020).
- 64 Carter, A. & Moss, S. J. Combined detrital-zircon fission-track and U-Pb dating: A new approach to  
65 understanding hinterland evolution. *Geology* **27**, 235–238 (1999).
- 66 Chen, Y., Yan, M., Fang, X., Song, C., Zhang, W., Zan, J. et al. Detrital zircon U-Pb geochronological  
67 and sedimentological study of the Simao Basin, Yunnan: Implications for the early Cenozoic  
68 evolution of the Red River. *Earth Planet. Sci. Lett.* **476**, 22–33 (2017).
- 69 Clark, M. K., House, M. A., Royden, L. H., Whipple, K. X., Burchfiel, B. C., Zhang, X. & Tang, W.  
70 Late Cenozoic uplift of south-eastern Tibet. *Geology* **33**, 525–528 (2005).
- 71 Clift, P. D., Blusztajn, J. & Nguyen, A. D. Large-scale drainage capture and surface uplift in eastern  
72 Tibet-SW China before 24 Ma inferred from sediments of the Hanoi Basin, Vietnam. *Geophys. Res.*  
73 *Lett.* **33**, L19403 (2006)
- 74 Clift, P. D., Long, H. V., Hinton, R., Ellam, R. M., Hannigan, R., Tan, M. T. et al. Evolving east Asian  
75 river systems reconstructed by trace element and Pb and Nd isotope variations in modern and  
76 ancient Red Rive-Song Hong sediments. *Geochem., Geophys., Geosyst.* **9**, Q04039 (2008).
- 77 El Tabakh, M., Utha-Aroon, C. & Schreiber, B.C. Sedimentology of the Cretaceous Maha Sarakham  
78 evaporites in the Khorat Plateau of northeastern Thailand. *Sediment. Geol.* **123**, 31–62 (1999).
- 79 Gilley, L. D., T. M. Harrison, P. H. Leloup, F. J. Ryerson, O. M. Lovera, and J.-H. Wang, Direct dating  
80 of left-lateral deformation along the Red River shear zone, China and Vietnam. *J. Geophys. Res.*  
81 **108 (B2)**, 2127 (2003).
- 82 He, J., Garzanti, E., Cao, L., & Wang, H. The zircon story of the Pearl river (China) from Cretaceous  
83 to present. *Earth Sci Rev.* **201**, 103078 (2020).
- 84 Hite, R.J. & Japakasetr, T. Potash deposits of Khorat Plateau, Thailand and Laos. *Econ. Geol.* **74**, 448–  
85 458 (1979).
- 86 Lei, C., Ren, J., Clift, P. D., Wang, Z., Li, X. & Tong, C. The structure and formation of diapirs in the  
87 Yinggehai–SongHong basin, South China Sea. *Mar. Pet. Geol.* **28**, 980–991 (2011).
- 88 Liu, C.L., Wang, L.C., Yan, M.D., Zhao, Y.J., Cao, Y.T., Fang, X.M., Shen, L.J., Wu, C.H., Lv, F.L. &  
89 Ding, T. The Mesozoic-Cenozoic tectonic settings, paleogeography and evaoritc sedimentation of  
90 Tethyan blocks within China: implications for potash formation. *Ore Geol. Rev.* **102**, 406–425  
91 (2018).
- 92 Morley, C.K. Late Cretaceous–Early Palaeogene tectonic development of SE Asia. *Earth Sci Rev.*  
93 **115**, 27–75 (2012).
- 94 Qin, Z., Li, Q., Zhang, X. G., Fan, Q. S., Wang, J. P., Du. Y. S., Ma, Y. Q., Wei, H. C., Yuan, Q. &  
95 Shan, F. S. Origin and recharge model of the late cretaceous evaporites in the khorat plateau. *Ore*  
96 *Geol Rev.* **116**, 103226 (2020).
- 97 Scharer, U., Z. Lian-Sheng, and P. Tapponnier, Duration of strike-slip movements in large shear zones:



- 98 The Red River belt, China. *Earth Planet. Sci. Lett.* **126**, 379–397 (1994).
- 99 Schoenbohm, L., Whipple, K. & Burchfiel, B.C. River incision into a relict landscape along the Ailao  
100 Shan shear zone and Red River fault in Yunnan Province, China. *Geol. Soc. Am. Bull.* **116**, 895–909  
101 (2004).
- 102 Shao, L., Cao, L., Qiao, P., Zhang, X., Li, Q., van Hinsbergen, D.J. Cretaceous–Eocene provenance  
103 connections between the Palawan Continental Terrane and the northern South China Sea margin.  
104 *Earth Planet. Sci. Lett.* **477**, 97–107 (2017).
- 105 Wang, C., Liang, X., Foster, D. A., Liang, X., Zhang, L. & Su, M. Provenance and drainage evolution  
106 of the Red River revealed by Pb isotopic analysis of detrital K-feldspar. *Geophys. Res. Lett.* **46**,  
107 6415–6424 (2019).
- 108 Wang, L. C., Liu, C., Gao, X. & Zhang H. Provenance and paleogeography of the Late Cretaceous  
109 Mengyejing Formation, Simao Basin, southeastern Tibetan Plateau: Whole-rock geochemistry,  
110 U-Pb geochronology, and Hf isotopic constraints. *Sedimentary Geol.* **304**, 44–58 (2014).
- 111 Wang, L. C., Zhong, Y. S., Xi, D. P., Hu, J. F. & Ding, L. The Middle to Late Cretaceous marine  
112 incursion of the Proto-Paratethys sea and Asian aridification: A case study from the Simao-Khorat  
113 salt giant, southeast Asia. *Palaeogeogr Palaeoclimatol Palaeoecol.* **567**, 110300 (2021).
- 114 Wang, Y. L., Wang, L. C., Wei, Y. S., Shen, L. J., Chen, K., Yu, X. C. & Liu, C. L. Provenance and  
115 paleogeography of the Mesozoic strata in the Muang Xai basin, northern Laos: petrology,  
116 whole-rock geochemistry, and U–Pb geochronology constraints. *Int J Earth Sci.* **106**, 1409–1427  
117 (2017).
- 118 Wang, Y., Schoenbohm, L. M., Zhang, B., Granger, D., Zhou, R.J., Zhang, J. J. & Hou, J. J. Late  
119 Cenozoic landscape evolution along the Ailaoshan shear zone, SE Tibetan Plateau: Evidence  
120 from fluvial longitudinal profiles and cosmogenic erosion rates. *Earth Planet. Sci. Lett.* **472**, 323–  
121 333 (2017).
- 122 Yan, M. D., Zhang, D. W., Fang, X. M., Zhang, W. L., Song, C. H et al. New Insights on the age of the  
123 Mengyejing formation in the Simao basin, SE Tethyan domain and its geological implications.  
124 *Sci China Earth Sci.* **64**, 231–252 (2021).
- 125 Zhang, P., L. Mei, S-Y., Jiang, S., Xu, R. A., Donelick, R. et al. Erosion and sedimentation in  
126 SE Tibet and Myanmar during the evolution of the Burmese continental margin from the  
127 Late Cretaceous to Early Neogene. *Gondwana Res.* In press (2021) doi:  
128 <https://doi.org/10.1016/j.gr.2021.04.005>.
- 129 Zhang, X.Y., Ma, H.Z., Ma, Y.Q., Tang, Q.L. & Yuan, X.L. Origin of the late Cretaceous  
130 potash-bearing evaporites in the Vientiane Basin of Laos:  $\delta^{11}\text{B}$  evidence from borates. *J. Asian*  
131 *Earth Sci.* **62**, 812–818 (2013).

### 132 **Response to common comments from Reviewer #1 and Reviewer #3**

133 **(1) Reviewer #1:** To track the provenance across continents for a specific geological time  
134 period (e.g., late Cretaceous to Paleocene), comparisons have to be made amongst such  
135 equivalent-aged sedimentary strata. The authors should give the age constraints of the strata  
136 as accurate as possible. We all know that the Upper Cretaceous to Paleocene in these studied  
137 basins are based on mostly by the ostracods that identified about 40 years ago, which is not  
138 robust age constraint. Although the authors provide the youngest single detrital zircon ages  
139 (80, 90, 76 Ma for Sample CX-34, CX-25, CX-36, respectively) of the Chuxiong Basin, the  
140 single zircon age is insufficient to tell the maximum depositional age (MDA).

141 **Reviewer #3:** The authors claimed that the sediments they studied are Late  
142 Cretaceous-Early Paleogene, but did not provide solid evidences to support, although I  
143 noticed in the Supplementary Information they have shown some fossils evidence, but these  
144 are not enough. Some recent studies have shown that the age of sediments in this area is  
145 significant older than the traditional fossils suggested, e.g., Gourbet et al. (2017). Therefore, if

146 the ages of these sediments are wrong, the river story could be changed.

147 **Reply:** As the reviewer#1 points out correctly, the maximum depositional age (MDA) is  
148 insufficient to constrain depositional ages with certainty. However, although the youngest  
149 single-grain ages from our samples are not a robust indicator of the true depositional age, they  
150 are consistent with the late Cretaceous–early Cenozoic biostratigraphic age of these deposits.  
151 More importantly, younger (i.e. late Eocene) zircons are completely lacking in our samples.  
152 Given that late Eocene plutons are common across southeastern Tibet (e.g., Lu et al., 2012;  
153 Deng et al., 2014); the absence of late Eocene zircon age implies that the studied continental  
154 red-beds are older than late Eocene.

155 We argue that the fossil assemblages provide reasonable information on the depositional  
156 age of our studied sedimentary sections and similar deposits that occur throughout eastern  
157 Tibet. The characteristic ostracods, charophyta, and few lamellibranchia are very common in  
158 late Cretaceous–early Paleocene strata from other areas of China as shown by recent reviews  
159 of Xi et al. (2019) and Wang et al. (2019), which provide further support for our age scheme.  
160 We wish to add that a recent magnetostratigraphy study shows that the Guankou and  
161 Mingshan Formations of the Shiyang section in the southwestern Sichuan Basin ranges in age  
162 from ~84 to ~43 Ma (Shen et al., 2018, Master thesis). Also, the Mengyejing Formation  
163 (which roughly correlates with the Guankou, Xiaoba, and Jiangdihe formation of this study)  
164 of the Jiangcheng section in the Simao Basin has been dated at ~112–63 Ma (Yan et al., 2021),  
165 largely in agreement with the palaeontological results. We added this information to the  
166 **Supplementary information.**

167 The Fig. R1 below summarizes the existing age data, which support our interpretation of  
168 a late Cretaceous to early Palaeocene age of the studied sediments.

169

## 170 **References**

- 171 Deng, B., Chew, D., Jiang, L., Mark, C., Cogne, N., Wang, Z. J. & Liu, S. G. Heavy mineral analysis  
172 and detrital U-Pb ages of the intracontinental Palaeo-Yangtze basin: Implications for a  
173 transcontinental source-to-sink system during Late Cretaceous time. *Geol. Soc. Am. Bull.* **130**,  
174 2087–2109 (2018).
- 175 Deng, J., Wang, Q. F., Li, G. J. & Santosh, M. Cenozoic tectono-magmatic and metallogenic processes  
176 in the Sanjiang region, southwestern China. *Earth-Science Reviews* **138**, 268–299 (2014).
- 177 Feng, M.G., Wu, J., Han, R.S., Zhu, Y.Z. & Yan, C.M. The salt-bearing strata in Vientiane plain, Laos.  
178 *Yunnan Geol.* **24**, 407–413 (2005).
- 179 Gu, X. D. & Li, X. H. Lithostratigraphy in Sichuan Province 207–217 (China University of  
180 Geosciences Press, 1997).
- 181 Huang, R. J. Cretaceous to early Tertiary Charophytes in Sichuan Province. *Acta*  
182 *Micropalaeontologica Sinica* **2**, 77–89 (1985).
- 183 Lu, Y.J., Kerrich, R., Cawood, P.A., McCuaig, T.C., Hart, C.J.R., Li, Z.X., Hou, Z.Q., Bagas, L. Zircon  
184 SHRIMP U–Pb geochronology of potassic felsic intrusions in western Yunnan, SW China:  
185 constraints on the relationship of magmatism to the Jinsha su-ture. *Gondwana Res.* **22**, 737–747  
186 (2012).
- 187 Royden, L. H., Burchfiel, B. C., Robert, D. H. The Geological Evolution of the Tibetan Plateau. *Science*  
188 **321**, 1155371 (2008).
- 189 SBGMR (Sichuan Bureau of Geology and Mineral Resources). Geological Map of the Emei Sheet  
190 (scale 1:50000) (Geological Publishing House Press, 1989).
- 191 SBGMR (Sichuan Bureau of Geology and Mineral Resources). Regional Geology of Sichuan Province  
192 h.11&12 (part I): 264–282 (Geological Publishing House, 1991).
- 193 Shen, Q. Cretaceous–Cenozoic magnetostratigraphy study in southwestern Sichuan Basin and its

194 geological significance. Master thesis in the Northwest University (2018).  
 195 Tang, Z. Biostratigraphic units in Mishi Basin in Panxi area. *Acta Geologica Sichuan*. **16**, 209–212  
 196 (1996).  
 197 Wang, Y. L., Wang, L. C., Wei, Y. S., Shen, L. J., Chen, K., Yu, X. C. & Liu, C. L. Provenance and  
 198 paleogeography of the Mesozoic strata in the Muang Xai basin, northern Laos: petrology,  
 199 whole-rock geochemistry, and U–Pb geochronology constraints. *Int J Earth Sci*. **106**, 1409–1427  
 200 (2017).  
 201 Wang, Y. Q., Li, Q., Bai, B., Jin, X., Mao, F. Y., Meng, J. Paleogene integrative stratigraphy and  
 202 timescale of China. *Sci China Earth Sci*. **62**, 287–309 (2019).  
 203 Xi, D. P., Wan, X. Q., Li, G. B., Li, G. Cretaceous integrative stratigraphy and timescale of China. *Sci*  
 204 *China Earth Sci*. **62**, 256–286 (2019).  
 205 Yan, M. D., Zhang, D. W., Fang, X. M., Zhang, W. L., Song, C. H et al. New Insights on the age of the  
 206 Mengyejing formation in the Simao basin, SE Tethyan domain and its geological implications. *Sci*  
 207 *China Earth Sci*. **64**, 231–252 (2021).  
 208 YBGMR (Yunnan Bureau of Geology and Mineral Resources). Geological Map of the Chuxiong Sheet  
 209 (scale 1:200000) (Geological Publishing House Press, 1966).  
 210 YBGMR (Yunnan Bureau of Geology and Mineral Resources). Regional Geology of Yunnan Province  
 211 Ch.11&12 (part D): 222–253 (Geological Publishing House, 1990).  
 212 Zhang D., Yan M., Fang X., Yang Y., Zhang T., Zan J., Zhang W., Liu, C & Yang Q.  
 213 Magnetostratigraphic study of the potash-bearing strata from drilling core ZK2893 in the Sakhon  
 214 Nakhon Basin, eastern Khorat Plateau. *Palaeogeogr Palaeoclimatol Palaeoecol*. **489**, 40–51  
 215 (2018).  
 216

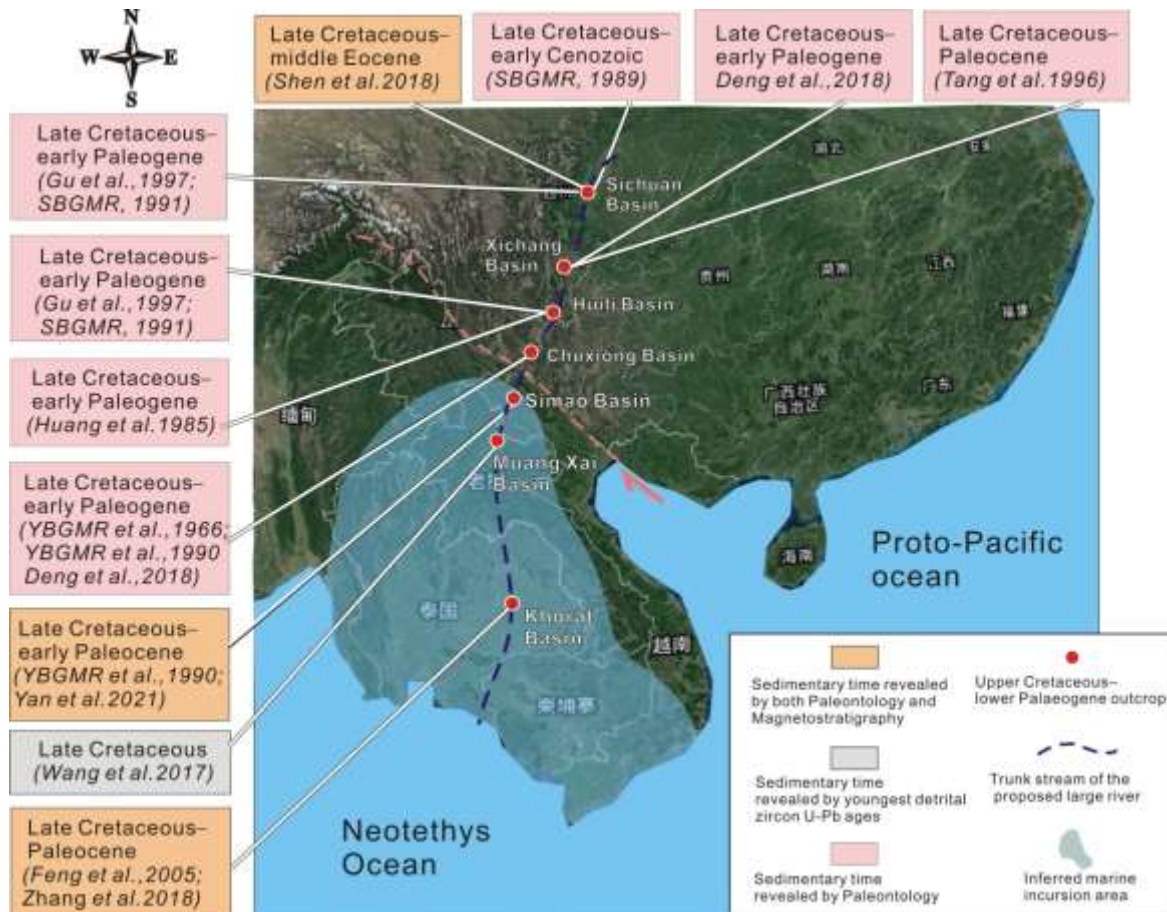

217  
 218 Figure R1. Summary of previously published sedimentary ages for upper Cretaceous to lower Palaeocene  
 219 deposits in eastern Tibet. The early Cenozoic paleogeography is from Royden et al. (2008). Base map is  
 220 from Google Earth.  
 221

222 **(2) Reviewer #1:** Even if a trans-continental river system flowed to the Neo-Tethyan Ocean,  
223 about the river course more evidence should be provided, e.g., provenance correlation to the  
224 west Burma? And to Khorat Basin? Cai F.L. et al. (2020, GSAB) indicated that the Upper  
225 Cretaceous-Eocene strata are mainly sourced from the western Myanmar Arc with detrital  
226 zircon age peaks of 100-60 Ma. This is totally different with the coeval strata of the eastern  
227 Tibetan basins in this study. Thus, in the reconstruction map Figure. 4, I strongly doubt the  
228 river flowed Simao via Myanmar to the Neo-Tethyan Ocean. Actually, the paleocurrent of the  
229 Simao Basin would suggest a connection with the Khorat basin (See Yan M.D., et al., 2021,  
230 and references therein).

231 **Reviewer #3:** The evidence of lack K2-E1 terrestrial deposits in the South China Sea to  
232 against a paleo-river flowed to the Proto-Pacific Ocean is not the truth. For example, as  
233 shown in the Fig. 3 of Clift et al., 2006 EPSL, the Paleogene sediments are very thick in the  
234 South China Sea. So the authors have to find strong evidences to support why a  
235 continental-scale river was flowed to the Neo-Tethyan Ocean rather than the Proto-Pacific  
236 Ocean.

237 **Reviewer #3:** If a southwest flow river to the Neo-Tethyan Ocean existed in the Late  
238 Cretaceous, more evidence from the Indochina and Sibumasu terranes must be shown,  
239 currently the westernmost basin shown in the manuscript is the Simao Basin, which cannot  
240 preclude the possibility that the river flowed to the South China Sea as previous model  
241 suggested.

242 **Reply:** Please see our response to the comment by the Associate Editor above (**numbers 1–5;**  
243 **Lines 8–80** in this letter). Also, please note that although Clift et al. (2006, EPSL) interpreted  
244 sedimentary deposits in the South China Sea to be Palaeogene in age (see Figure 3 of Clift et  
245 al., 2006, EPSL), borehole data have subsequently revealed that these terrestrial deposits are  
246 not older than late Eocene (~37 Ma) (as shown the Figure 4 in Clift et al., 2006 (GRL) and  
247 Clift et al., 2008, and Figure 2 in Wang et al., 2019).

#### 248 **References**

- 249 Clift, P. D. Controls on the erosion of Cenozoic Asia and the flux of clastic sediment to the ocean.  
250 *Earth Planet. Sci. Lett.* **241**, 571–580 (2006).
- 251 Clift, P. D., Blusztajn, J. & Nguyen, A. D. Large-scale drainage capture and surface uplift in eastern  
252 Tibet-SW China before 24 Ma inferred from sediments of the Hanoi Basin, Vietnam. *Geophys. Res.*  
253 *Lett.* **33**, L19403 (2006)
- 254 Clift, P. D., Long, H. V., Hinton, R., Ellam, R. M., Hannigan, R., Tan, M. T. et al. Evolving east Asian  
255 river systems reconstructed by trace element and Pb and Nd isotope variations in modern and  
256 ancient Red Rive-Song Hong sediments. *Geochem., Geophys., Geosyst.* **9**, Q04039 (2008).
- 257 Wang, C., Liang, X., Foster, D. A., Liang, X., Zhang, L. & Su, M. Provenance and drainage evolution  
258 of the Red River revealed by Pb isotopic analysis of detrital K-feldspar. *Geophys. Res. Lett.* **46**,  
259 6415–6424 (2019).

260

261

## 262 **Response to the comments of the three reviewers**

### 263 **Reviewer #1**

264 The evolution of large river is always a hot topic in earth science and attract huge interest.  
265 This study provide the traditional provenance results of the Upper Cretaceous to Paleocene in  
266 four basins, eastern Tibet, including petrographic modal counting and heavy mineral analysis  
267 for 22 samples and detrital zircon U-Pb ages for 16 samples. The results show the provenance  
268 similarities between the samples, the Songpan-Ganzi, Yidun, and Yangtze terranes, and the  
269 upper Jinsha, Min and Yalong rivers sand. Based on the provenance interpretation, the authors  
270 believed that there was a long-lived continental-scaled river system flowed into the  
271 Neo-Tethyan Ocean which generated a low-relief landscape in eastern Tibet. However, the  
272 provenance analysis and drainage reconstruction is questionable and thus conclusions in the  
273 manuscript are not reasonable. Moreover, there are several similar studies published before  
274 which eclipsed the significance of this study, not to mention several big weaknesses. Thus, I  
275 have to reject the manuscript for publication in *Nature Communications*.

276 **Reply:** As acknowledged by the reviewer, the paleo-drainage evolution and low-relief  
277 landscape formation in eastern Tibet have been debated for a long time. We acknowledge that  
278 we are not the first to propose a large-scale south-flowing river system prior to the India-Asia  
279 collision. However, the most significant finding/highlight of our manuscript is to link the  
280 development of this long-lived paleo-river system to the landscape evolution and the  
281 formation of the low-relief landscape in present-day eastern Tibet before Cenozoic uplift and  
282 plateau growth. Therefore, we argue that our study is of great significance and warrants  
283 publication in *Nature Communications*.

284 We have carefully considered the comments of reviewer #1. Below, we respond in detail  
285 to his/her major comments and argue that our interpretation is justified and robust.

286

### 287 **>Major Comments**

288 (1) The samples of the Simao Basin are from the Denghei Formation, which is believed to be  
289 deposited during Paleocene to late Eocene. The Upper Cretaceous to Lower Paleocene in the  
290 Simao Basin is the Mengyejing Formation which have robust radioactive and  
291 magnetostratigraphic constraints (112~>63 Ma, Yan M. et al., 2021, Science China Earth  
292 Science; Wang L. et al., 2015, Cretaceous Research). Please use provenance similarities to  
293 link continents and restore paleo-drainage systems only when the sedimentary strata are  
294 formed within a same time. Without correlation between the coeval strata, it is not convincible  
295 that the large-scale river can be flow into Simao and further south.

296 **Reply:** Although the Denghei Formation of the Simao Basin was assigned a Palaeocene-late  
297 Eocene age by Chen et al. (2017), their age scheme is based on palaeontology only. Chen et al.  
298 (2017) state that “*Paleocene to Eocene ostracods are present in the Denghei Fm., including*  
299 *Pinnocypris, Limnocythere, Ilyocypris, Cyprinotus, together with typical Paleocene*  
300 *charophytes of Gyrogona, Obtusochara, Peckichara*”). Since almost all of the above  
301 ostracods also occur in the lower Paleogene strata presented in our study (see Supplementary  
302 information) and because the magnetostratigraphic age of the Mengyejing Formation is  
303 112~>63 Ma (Yan et al., 2021), we argue that the Mengyejing Formation and the overlying  
304 Denghei Formation form a continuous sedimentary succession (which is older than late  
305 Eocene). Furthermore, the stratigraphic units studied by us can be correlated well with the  
306 Mengyejing Formation and Denghei Formations. For example, they all formed as red beds  
307 during a long period with dry climate (Regional Geology of Sichuan Province, 1991;  
308 Regional Geology of Yunnan Province, 1990) and were likely deposited during the same time  
309 interval. In the revised manuscript, we have added previously reported detrital zircon data

310 from the late Cretaceous Mengyejing Formation in the Simao basin for comprehensive  
311 provenance analysis (for details see **lines 212–216**, Fig. 3, and Figs. S4–6 in the revised  
312 manuscript).

313

#### 314 **References**

315 Chen, Y., Yan, M., Fang, X., Song, C., Zhang, W., Zan, J. et al. Detrital zircon U-Pb geochronological  
316 and sedimentological study of the Simao Basin, Yunnan: Implications for the early Cenozoic  
317 evolution of the Red River. *Earth Planet. Sci. Lett.* **476**, 22–33 (2017).

318 Sichuan Bureau of Geology and Mineral Resources. Regional Geology of Sichuan Province h.11&12  
319 (part I): 264–282 (Geological Publishing House, 1991).

320 Yan, M. D., Zhang, D. W., Fang, X. M., Zhang, W. L., Song, C. H et al. New Insights on the age of the  
321 Mengyejing formation in the Simao basin, SE Tethyan domain and its geological implications. *Sci*  
322 *China Earth Sci.* **64**, 231–252 (2021).

323 Yunnan Bureau of Geology and Mineral Resources. Regional Geology of Yunnan Province Ch. 11&12  
324 (part I): 222–253 (Geological Publishing House, 1990).

325

326 (2) The depositional environment is essential to reconstruct the paleo-river system. In  
327 Supplementary Information Xichang Basin section, for the Xiaoba and Leidashu Formations,  
328 Deng et al. (2018, ref. 16) never proposed a meandering river but a fluvial and  
329 shallow-lacustrine environment. Also, ref. 25 indicates a lacustrine environment. Together  
330 with the occurrence of evaporites, I think the lacustrine environment is more reasonable.

331 **Reply:** We have double-checked Deng et al. (2018, GSAB) and disagree with reviewer #1.  
332 Deng et al. (2018) did not suggest a meandering river environment, but proposed a fluvial  
333 environment for the Xiaoba and Leidashu Formations (page 9, lines 1–15). The lithological  
334 assemblage of the Xiaoba and Leidashu Formations in the Xichang Basin is characterized by  
335 alternating reddish sandstone, siltstone, and mudstone. Specifically, meter-thick sandstone  
336 beds with sharp erosional bases (Fig. R2) are most likely the result of lateral fluvial erosion  
337 and deposition (cf. Miall, 1996).

338

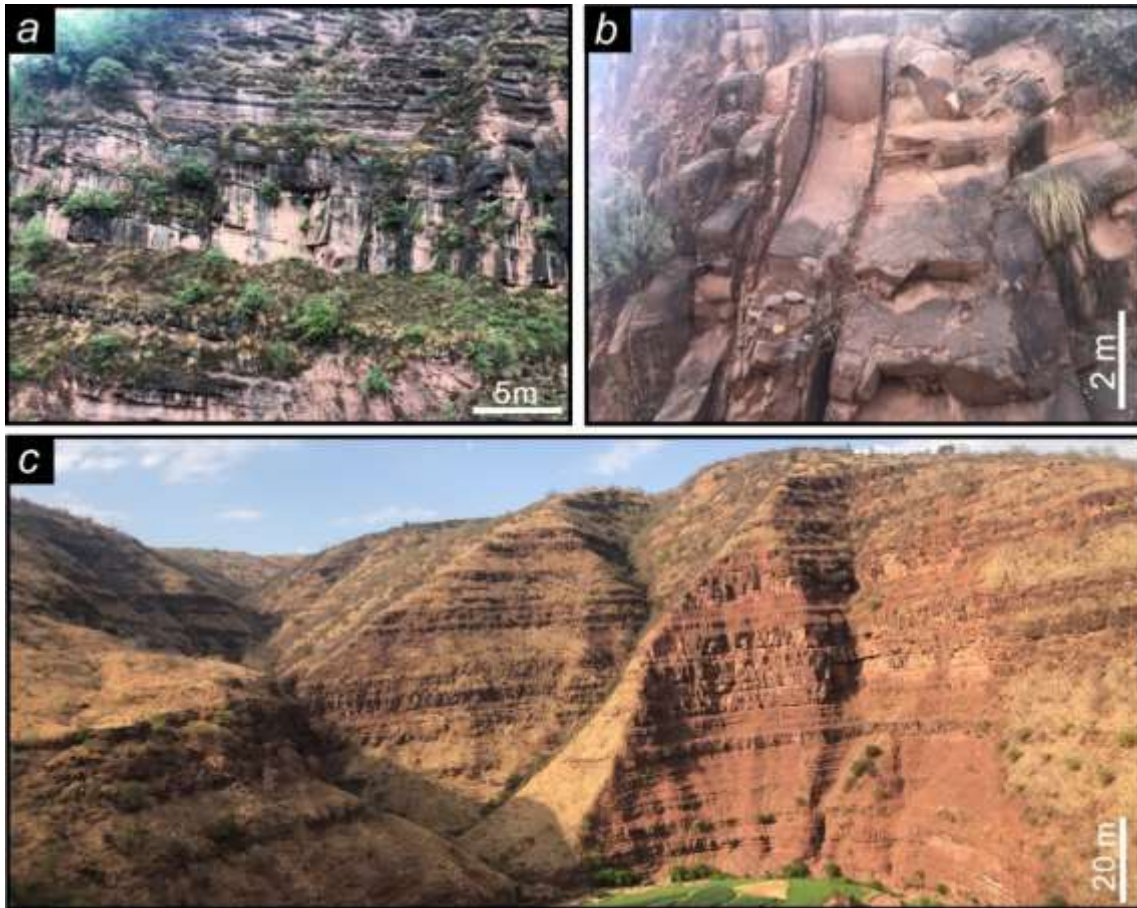

Figure R2. Typical fluvial sandstone bodies in Upper Cretaceous–lower Paleogene sedimentary rocks of the Xichang Basin (a), Huili Basin (b), and Chuxiong Basin (c). All photographs taken by Xudong Zhao.

Apart from lacustrine environments, siltstones and mudstones are also common in modern continental-scale river systems, especially in extensive and low-gradient floodplains of anastomosing or meandering rivers that provide accommodation space for fine-grained sediments (as shown the Figure 3b in Ashworth et al., 2012). Moreover, the present-day largest anastomosing rivers in the world often develop fine-grained sediments, with lakes and wetlands between levee-flanked channel branches and stable alluvial islands that divide flow up to bankfull (Knighton and Nanson, 1993; Abbado et al., 2005). In other words, the presence of fine-grained sediments in big river systems (as shown the Figure 3b in Ashworth et al., 2012) should not be taken as evidence for an overall lacustrine environment. Hence, we argue that our interpretation of a low-energy, muddy anastomosing or meandering river is reasonable for the Xichang Basin.

## References

- Abbado, D., Slingerland, R. & Smith, N.D. Origin of anastomosis in the upper Columbia River, British Columbia, Canada. In: Blum, M.D., Marriot, S.B., Leclair, S.M. (Eds.), *Fluvial Sedimentology VII.: Special Publication of the International Association of Sedimentologists*, 35. Blackwell, Oxford, UK, pp. 3–1(2005).
- Ashworth, P. J. & Lewin, J. How do big rivers come to be different? *Earth Sci Rev.* **114**, 84–107 (2012).
- Chen, Z., Xu, K. & Watanabe, M. Dynamic hydrology and geomorphology of the Yangtze River. In: Gupta, A. (Ed.), *Large Rivers: Geomorphology and Management*. Wiley, Chichester, pp. 457–469 (2007).
- Deng, B., Chew, D., Jiang, L., Mark, C., Cogne, N., Wang, Z. J. & Liu, S. G. Heavy mineral analysis

366 and detrital U-Pb ages of the intracontinental Palaeo-Yangtze basin: Implications for a  
367 transcontinental source-to-sink system during Late Cretaceous time. *Geol. Soc. Am. Bull.* **130**,  
368 2087–2109 (2018).

369 Knighton, D. & Nanson, G. Anastomosis and the continuum of channel pattern. *Earth Surf. Process.*  
370 *Landf.* **18**, 613–625 (1993).

371 Miall, A. D. The Geology of Fluvial Deposits: Sedimentary Facies, Basin Analysis, and Petroleum  
372 Geology, 362–365, *Springer* (1996).

373

374 (2 continued): In Chuxiong Basin section, I strongly doubt the interpretation of the exorheic  
375 lake because the thick evaporites are occurred in the Jiangdihe Formation. Similarly, the  
376 Upper Cretaceous Mengyejing Formation developed several hundred meters of evaporites,  
377 indicative of an endorheic basin. How to understand the drainage pattern when the large river  
378 flow into the Chuxiong and Simao Lake?

379 **Reply:** With respect to this comment, we note that “*Evaporite minerals are deposited within*  
380 *fluvial sub-strates by the evaporation of groundwaters and on the surface of playa mudflats*  
381 *during the evaporation of sheet floods. Thin beds, laminae, nodules, and individual crystals*  
382 *(or crystal casts) of evaporite, particularly gypsum and halite, are very common in the*  
383 *deposits of arid fluvial systems, especially in the distal regions where the braidplain or*  
384 *terminal fan merges imperceptibly into a playa lake or arid tidal flat (Smoot 1983; Glennie*  
385 *1987; Mertz and Hubert 1990).” cited from Miall (1996, p. 441). This sentence from Miall*  
386 *(1996) indicates that the presence of evaporites does not necessarily require an internal*  
387 *drainage pattern. During our field investigations in the Chuxiong Basin, we did not observe*  
388 *continuous and/or thick pure evaporites in the Jiangdihe Formation. The formation*  
389 *mechanism of small-scale evaporite rhythms is that “inflowing runoff ‘freshens’ the brine*  
390 *body and this, together with cooler air temperatures, causes either cessation of evaporite*  
391 *precipitation or precipitation of a less undersaturated phase—the runoff also brings in the*  
392 *suspended clastic sediment” (Leeder, 2011). Thus, to deny the existence of a through-going*  
393 *fluvial system on the basis of local evaporites is unsound, especially when considering the*  
394 *warm climate conditions during the Late Cretaceous to early Cenozoic.*

395 From the published literature it may indeed appear that several hundred meters of  
396 evaporites occur in the Upper Cretaceous Mengyejing Formation of the Simao basin (e.g.,  
397 Wang et al., 2020; Yan et al., 2021). However, many studies have demonstrated that these late  
398 Cretaceous–early Paleogene evaporites in the Simao basin (and the Khorat basin farther south)  
399 are mainly of **marine origin** and formed during incursions of the Tethys ocean (e.g., Hite and  
400 Japakasetr, 1979; El Tabakh et al, 1999; Zhang et al., 2013; Liu et al., 2018; Wang et al., 2020;  
401 Qin et al., 2020). As a consequence, the presence of these evaporites cannot be used as an  
402 argument against a fluvial system that drained into the Neo-Tethyan Ocean. We have clarified  
403 this issue in the revised **supplementary information (lines 203–214)**.

404

#### 405 **References**

406 El Tabakh, M., Utha-Aroon, C. & Schreiber, B.C. Sedimentology of the Cretaceous Maha Sarakham  
407 evaporites in the Khorat Plateau of northeastern Thailand. *Sediment. Geol.* **123**, 31–62 (1999).

408 Glennie, K. Desert sedimentary environments, present and past—a summary. *Sediment Geol.* **50**, 135–  
409 165 (1987).



410 Hite, R.J. & Japakasetr, T. Potash deposits of Khorat Plateau, Thailand and Laos. *Econ. Geol.* 74, 448–  
 411 458 (1979).

412 Leeder, M. *Sedimentology and Sedimentary Basins from Turbulence to Tectonics*, 117.  
 413 *Wiley-Blackwell* (2011).

414 Liu, C.L., Wang, L.C., Yan, M.D., Zhao, Y.J., Cao, Y.T., Fang, X.M., Shen, L.J., Wu, C.H., Lv, F.L. &  
 415 Ding, T. The Mesozoic-Cenozoic tectonic settings, paleogeography and evaporitic sedimentation of  
 416 Tethyan blocks within China: implications for potash formation. *Ore Geol. Rev.* **102**, 406–425  
 417 (2018).

418 Mertz, K. J. & Hubert, J. Cycles of sand-flat sandstone and playa-lacustrine mudstone in the  
 419 Triassic-Jurassic Blomidon redbeds, Fundy rift basin, Nova Scotia; implications for tectonics and  
 420 climatic controls. *Can J Earth Sci.* **27**, 442–451 (1990).

421 Miall, A. D. *The Geology of Fluvial Deposits: Sedimentary Facies, Basin Analysis, and Petroleum*  
 422 *Geology*, 441, *Springer* (1996).

423 Qin, Z., Li, Q., Zhang, X. G., Fan, Q. S., Wang, J. P., Du, Y. S., Ma, Y. Q., Wei, H. C., Yuan, Q. &  
 424 Shan, F. S. Origin and recharge model of the late cretaceous evaporites in the khorat plateau. *Ore*  
 425 *Geol Rev.* **116**, 103226 (2020).

426 Smoot, J. Depositional subenvironments in an arid closed basin; the Wilkins Peak Member of the  
 427 Green River Formation (Eocene), Wyoming, USA. *Sedimentology* **30**, 801–827 (1983).

428 Wang, L. C., Zhong, Y. S., Xi, D. P., Hu, J. F. & Ding, L. The Middle to Late Cretaceous marine  
 429 incursion of the Proto-Paratethys sea and Asian aridification: A case study from the Simao-Khorat  
 430 salt giant, southeast Asia. *Palaeogeogr Palaeoclimatol Palaeoecol.* **567**, 110300 (2021).

431 Zhang, X.Y., Ma, H.Z., Ma, Y.Q., Tang, Q.L. & Yuan, X.L. Origin of the late Cretaceous  
 432 potash-bearing evaporites in the Vientiane Basin of Laos:  $\delta^{11}\text{B}$  evidence from borates. *J. Asian*  
 433 *Earth Sci.* **62**, 812–818 (2013).

434

435 (3a) About the potential sources. I doubt if you correctly plot the age distribution of the  
 436 Yangtze terrane. Because all 1191 zircon ages in figure 3 and extended data figures 4&6 don't  
 437 show a prominent age peak of 750-1000 Ma which is believed to be a diagnostic feature of  
 438 the Yangtze. I tried to find the paper you cited (refs. 14& 30) and found that the zircon ages in  
 439 these papers are from the Early Paleozoic. So why the age peaks at ca. 150 Ma and 220 Ma  
 440 occur? I don't know the specific samples of the 1191 ages although you mentioned they were  
 441 from the pre-late Cretaceous strata. Thus, the relationship between the ages <200 Ma and the  
 442 Yangtze terrane need to be further proved.

443 **Reply:** We are sorry for the misunderstanding about the use of this name for the source area.  
 444 In the submitted manuscript, the term “Yangtze terrane” was meant to be the present-day  
 445 Sichuan Basin, to avoid the confusion between “Sedimentary Basin” and “Source Region”.  
 446 The 1191 zircon ages are all from the pre-late Cretaceous basement in the Sichuan Basin (Li  
 447 et al., 2018). The Jurassic–early Cretaceous zircons (peak at ca. ~150 Ma) in the pre-late  
 448 Cretaceous basement in the Sichuan Basin were likely derived from the southern margin of  
 449 the North China Block (e.g., the Qinling Belt, Dabie Belt) (Li et al., 2018). Regarding the  
 450 zircon age peak at ~220 Ma, there are several potential source areas, including the Songpan–  
 451 Ganzi and Yidun terranes to the west, the Qinling Belt to the north, and the Western Jiangnan  
 452 orogen to the east (Li et al., 2018).

453 It is likely that the source area with a prominent age peak of 750–1000 Ma mentioned by  
 454 the reviewer reflects the western South China block (see Fig. S4), where a variety of  
 455 Neoproterozoic strata/rocks along the western margin yield age peaks at 700–900 Ma (e.g., Li  
 456 et al., 2003; Sun et al., 2003). In the revised manuscript, we now use “Upper Yangtze terrane”

457 (cf. Huang et al., 2021), instead of “Yangtze terrane”, to refer to the generalized source region  
458 for the late Cretaceous–early Palaeogene deposits in the “Sichuan Basin”. For the locations of  
459 the Upper Yangtze terrane and the western South China, please refer to Fig. 1a. Corrections  
460 have also been made in **line 103** of the text.

461  
462

### 463 **References**

- 464 Li, Y. Q., He, D. F., Li, D., Lu, R. Q., Fan, C., Sun, Y. P. & Huang, H. Y. Sedimentary provenance  
465 constraints on the Jurassic to Cretaceous paleogeography of Sichuan Basin, SW China. *Gondwana*  
466 *Res.* 60, 15–33 (2018).
- 467 Li, Z. X., Li, X., Kinny, X., Wang, J., Zhang, S & Zhou, H. Geochronology of Neoproterozoic  
468 syn-rift magmatism in the Yangtze Craton, South China and correlations with other continents:  
469 Evidence for a mantle superplume that broke up Rodinia. *Precambrian Res.* **122**, 85–109 (2003).
- 470 Sun, W. H., Zhou, M. F., Gao, J. F., Yang, Y. H., Zhao, X. F., & Zhao, J. H. Detrital zircon U-Pb  
471 geochronological and Lu-Hf isotopic constraints on the Precambrian magmatic and crustal  
472 evolution of the Western Yangtze block, SW China. *Precambrian Res.* **172**, 99–126 (2009).
- 473 Huang, H. Y., He, D. F., Li, Y. Q., Li, D., Zhang, Y. Y., Chen, J. J. Late Permian tectono-sedimentary  
474 setting and basin evolution in the Upper Yangtze region, South China: Implications for the  
475 formation mechanism of intra-platform depressions. *Journal of Asian Earth Sciences*, **205**, 104599  
476 (2021).

477

478 (3b) Line 171-172, we cannot interpret the provenance just based on the age peaks. Why the  
479 Lhasa Terrane just simply provides the late Cretaceous zircons to the Chuxiong Basin, not  
480 conclude the other age populations? If you plot the Lhasa in the MDS diagram, you will find  
481 the Lhasa plot apart from your samples.

482 **Reply:** As discussed in the submitted manuscript, the Lhasa terrane was not a dominant  
483 source area for the late Cretaceous–early Palaeogene strata, but possibly provided some  
484 Cretaceous zircon component to these basins, because the provenance signal of the Lhasa  
485 terrane is characterized by a single Cretaceous age-peak (see Figure 12 in Yan et al., 2021).  
486 We interpret the sediment transport system from the Lhasa terrane as a small tributary of the  
487 proposed south-flowing river system. This explains why the Lhasa source would plot apart  
488 from our samples in the MDS diagram. Please note that we do not plot the data from the  
489 Lhasa terrane in the MDS diagram (Fig. S6).

490 Except for the Chuxiong Basin, the late Cretaceous-early Paleogene strata in the Simao  
491 Basin also contain appreciable Cretaceous zircons (Yan et al., 2021), which further supports  
492 the existence of a river system connected to the eastern Lhasa terrane at that time. Consistent  
493 with provenance evidence, previous thermochronologic studies have indicated that there was  
494 most likely an externally drained river system from the Lhasa terrane to the ocean during the  
495 late Cretaceous–early Palaeogene (Hetzl et al., 2011; Haider et al., 2013). Please note that we  
496 cannot rule out the possibility that the externally drained river systems originating in the  
497 Lhasa terrane were independent from our proposed continental-scale palaeo-drainage system  
498 (see Fig. R3). We have explained this issue on **lines 186–191** of the revised manuscript.

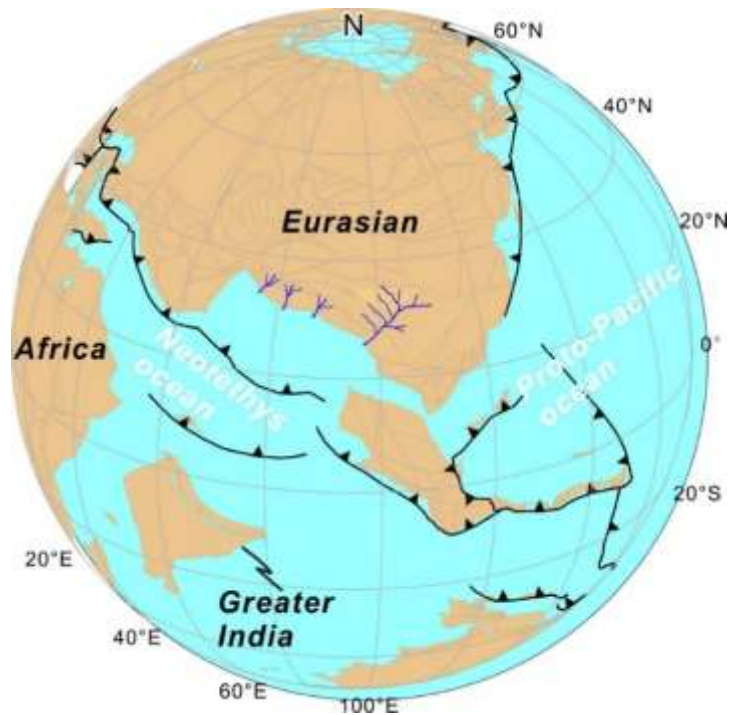

499  
500  
501  
502  
503  
504

Figure R3. Plate reconstruction of East Asia during the latest Cretaceous showing an alternative drainage model with several river systems draining the Lhasa or/and Qiangtang terranes to the Neo-Tethys (based on Hetzel et al., 2011; Haider et al., 2013; Gourbet et al., 2016). The map is generated by Xudong Zhao using open-access GPlates software (accessed through <https://www.gplates.org/>).

505 **References**

506 Gourbet, L., G Mahéo, Shuster, D. L., Tripathy-Lang, A., Leloup, P. H. & Paquette, J. L. River  
507 network evolution as a major control for orogenic exhumation: case study from the western tibetan  
508 plateau. *Earth Planet Sci Lett.* **456**, 168–181 (2016).  
509 Haider, V.L., Dunkl, I., Eynatten, H., Von Ding, L., Frei, D. & Zhang, L. Cretaceous to Cenozoic  
510 evolution of the northern Lhasa Terrane and the Early Paleogene development of peneplains at  
511 Nam Co, Tibetan Plateau. *J. Asian Earth Sci.* **70–71**, 79–98 (2013).  
512 Hetzel, R., Dunkl, I., Haider, V., Strobl, M., von Eynatten, H., Ding, L. & Frei, D. Peneplain formation  
513 in southern Tibet predates the India-Asia collision and plateau uplift. *Geology* **39**, 983–986 (2011).  
514 Yan, M. D., Zhang, D. W., Fang, X. M., Zhang, W. L., Song, C. H et al. New Insights on the age of the  
515 Mengyejing formation in the Simao basin, SE Tethyan domain and its geological implications. *Sci*  
516 *China Earth Sci.* **64**, 231–252 (2021).

517 (3c) In the MDS plot (Figure 5b), clearly, the Min River and Yalong River plot apart from the  
518 samples. The age peaks of Yalong River sand are different from the samples and  
519 Songpan-Ganzi. Only Upper Jinsha river plot closer to the samples. So how do you explain  
520 your drainage reconstruction?

521 **Reply:** The reviewer brings up an important point. For exploring this issue, we collected more  
522 detrital zircon data of the Yalong River from the literatures (Yang et al., 2012; He et al., 2013),  
523 and found that the detrital zircon age components of the Yalong River indeed differ from our  
524 late Cretaceous–early Palaeogene samples, because the Yalong River displays (1) a higher  
525 abundance of 600–1000 Ma zircon grains derived from the western margin of the South China  
526 block, and (2) shows a secondary age peak at 250–200 Ma that likely indicates a contribution  
527 from the Yidun Terrane (Fig. S4b). However, the sand sample from the Minjiang River that  
528 drains the Songpan–Ganzi region, plots closer to our K<sub>2</sub>–E<sub>1</sub> samples in the MDS plot,

529 supporting that the Triassic flysch of the Songpan–Ganzi terrane is the primary source for  
530 these K<sub>2</sub>–E<sub>1</sub> strata. We have updated the revised manuscript to clarify this issue in **lines 170–**  
531 **172** of the revised manuscript and in Figs. S4 and S6.

532

### 533 **References**

534 He, M., Zheng, H., Clift, P.D. Zircon U–Pb geochronology and Hf isotope data from the Yangtze River  
535 sands: implications for major magmatic events and crustal evolution in central China. *Chem. Geol.*  
536 360–361, 186–203 (2013).

537 Yang, S., Zhang, F., Wang, Z. Grain size distribution and age population of detrital zircons from the  
538 Changjiang (Yangtze) River system, China. *Chem. Geol.* 296, 26–38 (2012).

539

540 (4) As mentioned above, for the reasons of the depositional environment and provenance  
541 interpretation, I disagree with the idea that a large-scale river system that connect the all the  
542 so-called exorheic basins although I agree somehow a south-flowing river exists. Specifically,  
543 the Chuxiong and Simao are two endorheic basins with several hundred meters of evaporites.  
544 Perhaps, the river just stop when it flowed into these two basins.

545 **Reply:** We have explained this issue above in our response to the reviewer’s major point 2.

546 (4 continued) More importantly, large river system in the Late Cretaceous flowed to the  
547 Neo-Tethyan Ocean had been proposed by Yan Maodu et al., 2021, *Science China Earth*  
548 *Science*. So it is not the authors who claimed that they proposed it for the first time. I found  
549 that there are several papers proposed a large river system prior to the collision between India  
550 and Asia, e.g., Deng et al. (2018, ref. 16); Wang L.C., et al. 2020, *Palaeo-3*; Yan M., et al.,  
551 2021.

552 **Reply:** We acknowledge that we are not the first to propose a large-scale south-flowing  
553 river system prior to the India and Asia collision. Our work does lend new support to these  
554 previous assertions. Moreover, the most significant and novel finding of our study is to link  
555 the development and extent of this long-lived paleo-river system to the formation of the  
556 low-relief landscape in eastern Tibet before Cenozoic uplift and plateau growth.

557

558

### 559 **(5) Data and methodology**

560 (5-1) Petrography part. The authors should tell the readers what kind of method you use when  
561 you do modal analysis. Usually, sedimentary geologists use the Gazzi-Dickinson method  
562 (Ingersoll et al., 1984). And all ternary diagrams should cite the original references. >In  
563 Extended data Figure 2, you use Lc to represent the carbonatite lithic, however, the Ls was  
564 used in the Table S2. Moreover, I strongly doubt the high percentage of carbonatite lithic in  
565 the samples, if yes, why don’t you count these into the Lv?

566 **Reply:** We appreciate the advice from the reviewer. We added the original references  
567 (Dickinson et al., 1983; Ingersoll et al., 1984) to the revised manuscript. We have also made  
568 the abbreviations for the different lithic components consistent throughout the revised  
569 manuscript: Ls is terrestrial sedimentary lithic, Lc refers to carbonate lithic, and Lv is  
570 volcanic lithic (the latter should not be combined with the carbonate lithic).

571

572 **References**

573 Dickinson, W.R., Beard, S.L., Brakenridge, G.R., Erjavec, J.L., Ferguson, R.C., Inman, K.F., Knepp,  
574 R.A., Lindberg, F.A. & Ryberg, P.T. Provenance of North American Phanerozoic sandstones in  
575 relation to tectonic setting. *Geol. Soc. Am. Bull.* **94**, 222–235 (1983).

576 Ingersoll, R. V., Bullard, T. F., Ford, R. L., Grimm, J. P., Pickle, J. D. & Sares, S. W. The effect of  
577 grain size on detrital modes: A test of the Gazzi-Dickinson point-counting method. *J Sediment*  
578 *Petrol.* **54**, 103–116 (1984).

579  
580 (5-2) For all 22 samples for petrographic and heavy mineral analysis, I suggest the authors  
581 give a table that contains the GPS and stratigraphic information (I can't tell which formation  
582 and basin of some samples belong to, e.g., CX-29, CX-01, CX08). In Extended data Figure 1,  
583 the authors should locate the heavy mineral samples in the stratigraphic columns of the  
584 Xichang, Huili, and Chuxiong basins.

585 **Reply:** As requested by reviewer #1, we added a table (Table S3) that contains the GPS and  
586 stratigraphic information. In Fig. S1, all detrital zircon samples from the Xichang, Huili, and  
587 Chuxiong basins were also analyzed for heavy minerals, so locations of heavy mineral and  
588 detrital zircon samples from the Xichang, Huili, and Chuxiong overlap (please see legend of  
589 Fig. S1, where red stars refers to samples used for heavy mineral and detrital zircon analysis).

590

591 (5-3) Detrital zircon geochronology part. More information should be provided to let the  
592 readers examine the reliability of your data. What are the dating results of your age external  
593 standards? And how do these results compared to the suggested age values? So you should  
594 provide the dating results the standard zircons. In addition, relevant citations should be given  
595 regarding external standards. The representative CL images of detrital zircons especially the  
596 ones with young ages (<200 Ma in this area) is very important. Because in my opinion, these  
597 young zircons are mostly from local source.

598 **Reply:** To determine fractionation factors and correct for instrumental drift, two standards  
599 (91500 and GJ-1) were analyzed every 10 grains; element content was determined by  
600 NIST610 as external standard. We have revised this part in the manuscript (lines 298–304).  
601 All dating results of the standard zircons are available and the zircon standards are described  
602 in Yuan et al. (2004). We think that an extensive method description is not required, because  
603 detrital zircon geochronology is a standard tool and detailed information on methodology, age  
604 standards, and analytical procedures are available in the cited references (Andersen, 2002;  
605 Yuan et al., 2004).

606 As zircon grains of different age were indistinguishable based solely on CL images, we  
607 refrain from showing CL images. Ages <200 Ma most likely reflect recycled grains from  
608 pre-late Cretaceous strata in the Sichuan Basin (Upper Yangtze terrane), as suggested by  
609 petrographic and heavy mineral data.

610 **References**

611 Andersen, T. Correction of common lead in U-Pb analyses that do not report 204Pb. *Chem. Geol.* **192**,  
612 59–79 (2002).

613 Yuan, H. L., Gao, S., Liu, X. M., Li, H. M., Günther, D. & Wu, F. Y. Accurate U-Pb age and trace  
614 element determinations of zircon by laser ablation inductively coupled plasma mass  
615 spectrometry. *Geostand. Geoanal. Res.* **28**, 335–370 (2004).

616

617 (5-4) The method of MDS is not sufficiently explained. (a) How the MDS map was generated?  
618 (b) Which metric do you choose when you plot the MDS, e.g., likeness, similarity.....?

619 **Reply:** We added a method description on how we generated the MDS plot. Note that the  
620 MDS method used (cf. Vermeesch, 2013) is based on ‘dissimilarities’ between samples.

621 **Reference:** Vermeesch, P. Multi-sample comparison of detrital age distributions. *Chem. Geol.* **341**,

622 140–146 (2013).

623

624 (5-5) Line 461-464, the K-S test p-value is not recommended to use. Use of the K-S or Kuiper  
625 test p-values for quantitative similarity analysis of detrital geochronological data sets is likely  
626 to lead to incorrect conclusions (Satkoski et al., 2013, GSA Bulletin; Vermeesch, 2013; Saylor  
627 and Sundell, 2016, Geosphere). As noted by Vermeesch (2013), the D or V values provide  
628 more robust assessment of the dissimilarity between samples than do p-values. Thus, the D or  
629 V values of K-S or Kuiper tests are suggested to use.

630 **Reply:** Thank you for this helpful comment. As suggested, we replaced the K-S test p-value  
631 by the *D* values of K-S and the *V* values of the Kuiper tests (please see improved Table S1).

632

### 633 (6) Minor Comments:

634 (6-1) Line 103, Yangtze is believed to be a part of South China block, why did you show a  
635 different concept? The same as in Figure 1a.

636 **Reply:** We have explained this issue above in our response to the reviewer's major point 3a.

637

638 (6-2) Line 125-128, I can't understand why the late Cretaceous-early Paleogene strata could  
639 represent the youngest terrestrial clastic deposits? At least the Lower Cretaceous in these  
640 basins are terrestrial clastic rocks.

641 **Reply:** This appears to be a misunderstanding by the reviewer. Apart from very limited  
642 Quaternary sediments (i.e. the Xigeda Formation), the late Cretaceous–early Paleogene strata  
643 are the youngest terrestrial clastic deposits at the eastern margin of Tibet. Of course, there are  
644 also older sedimentary strata of Lower Cretaceous age (but these are not the focus of our  
645 study).

646

647 (6-3) Line 131, the same as the previous comment, actually the Upper Cretaceous evaporates  
648 developed in the SW Sichuan, Xichang, Chuxiong, and Simao Basins (Liu Shugen et al., 2019,  
649 Journal of Chengdu University of Technology, v.46, No. 1, 1-28; and references therein).  
650 Especially, thick evaporites were developed in the Chuxiong and Simao Basin (Liu Chenglin  
651 et al., 2018, Ore Geology Reviews).

652 **Reply:** We have explained this issue in our response to the previous comments above. Here,  
653 we only add that Liu Chenglin et al. (2018, Ore Geology Reviews) did not propose that thick  
654 evaporites occur in the Chuxiong basin, which is consistent with our field investigations.

### 655 Reference:

656 Liu, C.L., Wang, L.C., Yan, M.D., Zhao, Y.J., Cao, Y.T., Fang, X.M., Shen, L.J., Wu, C.H., Lv, F.L. &  
657 Ding, T. The Mesozoic-Cenozoic tectonic settings, paleogeography and evaporitic sedimentation of  
658 Tethyan blocks within China: implications for potash formation. *Ore Geol. Rev.* **102**, 406–425  
659 (2018).

660

661 (6-4) Line 135-137, about the depositional environment interpretation, pls see my comments  
662 above.

663 **Reply:** We have already addressed this issue in our response to the major comment 2 of  
664 reviewer #1 above.

665

666 (6-5) Line 204-205, during K2-E1, the global sea level was gradually rose from ca. 80 Ma to  
667 60-50 Ma, and fell since 50 Ma (Miller et al., 2005, Science, 10.1126/science.1116412). Thus,  
668 it is not stable. How to understand?

669 **Reply:** We agree that sea level was not stable in a rigorous sense. Nevertheless, Figs. 2 and 3  
670 in Miller et al. (2005) indicate that the global sea level rose very slowly (but did not change  
671 significantly between ~92 Ma and ~55 Ma (as shown the Figure 3 in Miller et al., 2005). In  
672 the revised manuscript, we explain that the sea level was slowly rising (line 233). Note that  
673 the slowly rising sea level, coupled with an arid climate, could well be responsible for the  
674 marine incursions to the Simao to Khorat basins and the formation of the marine evaporites  
675 there.

676

#### 677 **References**

678 Miller, K. G., Kominz, M. A., Browning, J. V., Wright J. D., Mountain, G. S., Katz, M. E, Sugarman, P.  
679 J., Cramer B. S., Christie-Blick, N. & Pekar S. F. The Phanerozoic Record of Global Sea-Level  
680 Change. *Science* **310**, 1293–1298 (2005).

681

682 (6-6) Actually, Deng B. et al. (2018, GSAB) published many detrital zircon ages of the Upper  
683 Cretaceous-Paleocene in Sichuan, Chuxiong basins. I suggest the authors should compile all  
684 published detrital zircon ages together with this study to do provenance analysis.

685 **Reply:** The error calculation of the detrital zircon data of Deng B. et al. (2018) and ours are  
686 different. Moreover, zircon age spectra from Deng et al. (2018) are largely similar to our data,  
687 thus compiling more detrital zircon ages would not change the conclusions of our study.

688

#### 689 **References**

690 Deng, B., Chew, D., Jiang, L., Mark, C., Cogne, N., Wang, Z. J. & Liu, S. G. Heavy mineral analysis  
691 and detrital U-Pb ages of the intracontinental Palaeo-Yangtze basin: Implications for a  
692 transcontinental source-to-sink system during Late Cretaceous time. *Geol. Soc. Am. Bull.* **130**,  
693 2087–2109 (2018).

694

695 (6-7) Figure. 1, where is the Sichuan Basin?

696 **Reply:** We added the term "Sichuan Basin" (also called Upper Yangtze terrane as explained  
697 above) in Fig. 1.

698

699 (6-8) Supplementary Information line 41-42, very thick evaporites were developed in the  
700 Upper Cretaceous Chuxiong and Simao Basin. Thus, it is not an indication of river discharge  
701 but an endorheic lake.

702 **Reply:** We have addressed this issue in detail in our response above.

703

704 (6-9) Extended figure 4a and 4b, all the references are not incorrect. I can't find any  
705 mentioned samples in these cited papers (ref 31, 47, and 25). For the ref. 25, maybe you want  
706 to refer to ref. 14 (Chen Y., et al., 2017, EPSL).

707 **Reply:** We are sorry that the numbers of the cited reference were incorrect. In the revised  
708 manuscript, the reference numbering has been corrected.

709 (6-9 continued) However, the 272 zircon ages from ref. 14 belong to the Denghei Formation,  
710 which was assigned a Paleocene-late Eocene in age based on the fossils. Thus, I doubt  
711 whether it is reasonable to correlate to the Simao basin in this manuscript.

712 **Reply:** We have addressed this issue in our response to the second part of main point 1 above.

713

## 714 **Reviewer #2 (Andrew Laskowski)**

715 This study reports provenance data (detrital zircon and sandstone petrography) from  
716 Cretaceous- Eocene sedimentary basins that are located along the southeast margin of the  
717 Tibetan Plateau. The authors observe that the provenance data is very consistent between  
718 basins and back up these observations with statistical methods that are mainly presented in the  
719 supplementary figures. To explain these data, the authors argue that there was likely a  
720 continent-scale river that connected the basins and drained to the Neo-Tethyan Ocean, which  
721 separated India from Eurasia prior to India-Asia collision. The authors note that this  
722 interpretation also has relevance to the debate over the low-relief, incised landscapes that are  
723 located along the southeast margin of the Tibetan Plateau. This aspect of the research will  
724 likely be the most broadly relevant and controversial aspect. Several dynamic models for  
725 Tibetan Plateau growth invoke different mechanisms for formation of the low-relief  
726 landscapes. This, coupled with the inherent interestingness of ancient, continental-scale rivers,  
727 make this research exciting and broadly relevant.

728 As I am an expert on detrital zircon geochronology and the tectonics of the Tibetan  
729 Plateau, I chose to focus on these aspects for my review. In my opinion, the provenance data  
730 are robust and well supported by statistical methods. I would encourage the authors to include  
731 some more discussion of their comparison between source terrane signatures and basin  
732 signatures. A key point that must be proven is that the source areas are distinguishable based  
733 on their detrital zircon age spectra whereas all the sampled basins are not, indicating mixing  
734 by a large river system. The supplementary figures were very helpful to convince me of the  
735 validity of the argument, yet they are sparsely discussed or referenced in the main text.

736 **Reply:** We sincerely thank Prof. Andrew Laskowski for his positive and constructive  
737 comments. We applied multiple statistical methods to the zircon U-Pb age distributions  
738 including probability density function plots, multidimensional scaling, DZStats, and DZMix  
739 modeling. These different methods yielded consistent results.

740 As requested, we first emphasize the application of multiple methods and their consistent  
741 results at the beginning of the provenance analysis section (**lines 155–158**). More importantly,  
742 we also added more comparison and discussion details for each statistical method in the  
743 revised manuscript (please see **lines 162–169**).

744

745 The authors also present a landscape evolution model that they link with their thermal  
746 modeling results. They claim that it illustrates the plausibility of the continent-scale river  
747 along the southeastern Tibetan Plateau because faster exhumation rates would be expected in  
748 the upstream reaches of the drainages. This seems plausible to me, but the authors should also



749 emphasize that the Lhasa Terrane hosted an active, Cordilleran orogenic system at the time of  
750 deposition of the samples. It has previously been likened to the modern Andes. It should not  
751 be implied that fluvial drainage networks were solely responsible for the cooling of samples  
752 further toward the interior of the Tibetan Plateau, as the tectonic activity in this region  
753 undoubtedly affected these results.

754 **Reply:** We agree with the comment on the tectonically active Lhasa terrane during K<sub>2</sub>–E<sub>1</sub> and  
755 mention this issue in the revised manuscript (**lines 186–191**). Previous studies revealed  
756 widespread uplift in the Lhasa area during the late Cretaceous to early Cenozoic (e.g.,  
757 Rohrmann et al., 2012; Kapp and DeCelles, 2019), and argued that there was an externally  
758 drained river system that connected the Lhasa terrane to the Neo-Tethys Ocean (Hetzl et al.,  
759 2011; Haider et al., 2013). Thus, a combination of surface uplift due to crustal shortening and  
760 fluvial erosion likely caused more rapid cooling in the Tibetan hinterland as revealed by  
761 thermochronologic data (see Fig. 1). These observations indicate that the spatial trend in  
762 exhumation rates from central to eastern Tibet created a gently topographic slope in the  
763 eastern part of our envisaged paleo-river system.

764

#### 765 **References**

- 766 Haider, V.L., Dunkl, I., Eynatten, H., Von Ding, L., Frei, D. & Zhang, L. Cretaceous to Cenozoic  
767 evolution of the northern Lhasa Terrane and the Early Paleogene development of peneplains at  
768 Nam Co, Tibetan Plateau. *J. Asian Earth Sci.* **70–71**, 79–98 (2013).
- 769 Hetzel, R., Dunkl, I., Haider, V., Strobl, M., von Eynatten, H., Ding, L. & Frei, D. Peneplain formation  
770 in southern Tibet predates the India-Asia collision and plateau uplift. *Geology* **39**, 983–986 (2011).
- 771 Kapp, P. & DeCelles, P.G. Mesozoic–Cenozoic geological evolution of the Himalayan-Tibetan orogen  
772 and working tectonic hypotheses. *American Journal of Science.* **319**, 159–254 (2019).
- 773 Rohrmann, A., Kapp, P., Carrapa, B., Reiners, P. W., Guynn, J., Ding, L. & Heizler, M.  
774 Thermochronologic evidence for plateau formation in central Tibet by 45 Ma. *Geology* **40**, 187–190  
775 (2012).

776

#### 777 **Reviewer #3**

778 Comments to ‘Existence of a continental-scale river system in eastern Tibet during the late  
779 Cretaceous–early Paleogene’ By Zhao et al. Based on new petro-stratigraphy, heavy-mineral  
780 analysis, and detrital zircon U-Pb studies on late Cretaceous–early Paleogene sediments from  
781 the east margin of Tibet, Zhao et al. proposed a novel continental-scale river flowing  
782 southwestward to the Neo-Tethyan Ocean along the eastern Tibet in the late Cretaceous–early  
783 Paleogene, and used this river to explain the formation of low-relief in the east margin of  
784 Tibet. The topic of this study is of broad interest for geologists, and the proposed model is  
785 significant different with previous models, which seems valuable for publication in *Nature*  
786 *Communications*. However, there are some important unclears in the manuscript, which  
787 should be addressed before acceptance.

788

789 (1) The authors argued that the K<sub>2</sub>–E<sub>1</sub> sediments were not deposited in spatially separated  
790 endorheic basins based on the lack of coarse-grained sediments and thick evaporites. However,  
791 these are not strong evidence to preclude this possibility. It is very likely that these sediments  
792 were derived locally by recycling from surrounding older rocks. For example, the Nangqian  
793 and Gonjo basins in eastern Tibet show similar lithologies as the K<sub>2</sub>-E<sub>1</sub> sediments by the

794 authors, but studies have shown that the two basins were sourced locally (Horton et al., 2002).  
795 The authors also suggested that the low-relief could not be severed as physiographic barriers  
796 for endorheic basins. However, endorheic basin can be formed in any landscape with local  
797 structures, e.g., normal fault.

798 **Reply:** The sedimentary facies in the Xichang, Huili, Chuxiong, and Simao basins are  
799 dominated by fluvial, lacustrine, and floodplain, lacking proximal facies (e.g., alluvial-fan)  
800 and do not resemble the basins in the Nangqian-Yushu region argued to be internally drained.  
801 Horton et al. (2002) suggested an internal drainage for basins in the Nangqian-Yushu region  
802 of east-central Tibet based on centrally directed paleocurrents, dominantly lacustrine  
803 depositional conditions, and a lack of single lithostratigraphic units that can be correlated  
804 regionally among the basins. More importantly, preserved proximal facies (i.e., alluvial-fan)  
805 were limited to basin margins, and fine-grained lacustrine deposition was mainly developed in  
806 the present-day basin interior. Such distinct lateral facies evolution, together with growth  
807 strata along the basin margins, indicates that the basins developed as distinct, isolated features  
808 with dimensions approximately similar to their present-day outcrop areas.

809 If the K<sub>2</sub>–E<sub>1</sub> sediments in this study had formed in endorheic basins, analogous to the  
810 Nangqian basin, thick gravel or gravelly sandstone deposits or growth strata (near  
811 basin-controlling faults) would be expected; however, such sedimentary deposits were not  
812 identified by us.

813 From the perspective of provenance data, if the K<sub>2</sub>–E<sub>1</sub> sediments were derived locally by  
814 recycling from surrounding older rocks, we would expect the widespread Neoproterozoic  
815 metamorphic rocks surrounding these basins (at the western margin of South China Block)  
816 (e.g., Li et al., 2005) to provide a major source of detrital material and a unique prominent  
817 peak at 600–900 Ma (similar to the provenance signal of the current Anning river, which  
818 drains the western margin of the South China block; see Figure 2 in Yang et al., 2020).  
819 However, our data clearly show that zircon age populations from all studied basins fall mainly  
820 into five different groups of 200–300 Ma, 390–480 Ma, 700–900 Ma, 1700–2000 Ma, and  
821 2300–2600 Ma. Furthermore, a slow long-term exhumation of the areas around these basins  
822 from late Cretaceous to early Palaeogene is clearly documented by our compilation of  
823 thermochronological data (Fig. 1b), indicating there was no significant local erosion occurring  
824 around these basins at that time. In summary, we favor that all studied basins along eastern  
825 margin of the Tibetan Plateau were characterized by externally drained rivers from late  
826 Cretaceous to early Paleogene. We added this discussion to the revised manuscript (**lines 197–**  
827 **207**).

828 Although we agree with reviewer #3 that endorheic basins can be formed in any  
829 landscape with local structures, the combination of the axial distribution of the southwestern  
830 Sichuan, Xichang, Huili, and Chuxiong basins along the foredeep depozone between eastern  
831 Tibet and South China (Fig. 1) and their provenance interpretations, fits well with the model  
832 of **Lateral tributary-dominated trans-continental river system** (e.g., Ganges, Mississippi,  
833 Paraná) proposed by Ashworth et al. (2012) (as shown the Figure 2 in Ashworth et al., 2012).  
834 “Big rivers may extend into sedimentary basins, but they also cross them (e.g. Danube,  
835 Yangtze), and have longitudinally-extensive depositional zones” (Ashworth et al., 2012).

836 The identification of ancient big rivers would follow three elements based on the  
837 suggestion from Miall. (2006), including (1) Prediction from plate-tectonic setting, (2)  
838 Analysis of the scale of depositional elements, and (3) Study of sedimentary provenance. If it  
839 is a case, a combination of long-term tectonic stability, several meters to tens of meters thick  
840 channel beds, and common provenance signals presented our study, leads us to more strongly  
841 believe the existence of a large-scale river system.

842

843 **References**

844 Ashworth, P. J. & Lewin, J. How do big rivers come to be different? *Earth Sci Rev.* **114**, 84–107  
845 (2012).

846 Horton, B. K., Yin, A., Spurlin, M. S., Zhou, J. Y. & Wang, J. H. Paleocene-Eocene syncontractional  
847 sedimentation in narrow, lacustrine-dominated basins of east-central Tibet. *Geol Soc Am Bull.*  
848 **114**, 771–786 (2002).

849 Li, Z. X., Li, X. H., Kinny, P. D., Wang, J., Zhang, S., & Zhou, H. Geochronology of Neoproterozoic  
850 syn-rift magmatism in the Yangtze Craton, South China and correlations with other continents:  
851 evidence for a mantle superplume that broke up Rodinia. *Precambrian Res.* **122**, 85–109 (2005).

852 Miall, A. D. How do we identify big rivers? And how big is big? *Sediment Geol.* **186**, 39–50 (2006).

853 Yang, R., Suhail, H. A., Gourbet, L., Willett, S. D., Fellin, M. G., Lin, X. B., Gong, J. F., Wei, X. C.,  
854 Maden, C., Jiao, R. H. & Chen, H. L. Early Pleistocene drainage pattern changes in Eastern  
855 Tibet: Constraints from provenance analysis, thermochronometry, and numerical modeling.  
856 *Earth Planet. Sci. Lett.* **531**, 115955 (2020).

857

858 (2) The biggest problem of this manuscript is the Fig. 4, which is inconsistent with the  
859 tectonic background. The authors refer the reference of Muller et al. (2016) for the late  
860 Cretaceous paleogeography reconstruction, but the map shown in Fig. 4a is inconsistent with  
861 geological evidence: The Indochina and Sibumasu, which locate southwest of the South China  
862 Block, have amalgamated to South China in Late Triassic, and the Lhasa has collided with  
863 Qiangtang in the early Cretaceous, so it is impossible that a Neo-Tethyan Ocean was still  
864 existed between South China and Indochina as shown in Fig. 4a.

865 **Reply:** We agree with this comment regarding the late Cretaceous paleogeography pattern  
866 and acknowledge our mistake. We have now corrected Fig. 4 by integrating the Indochina and  
867 Sibumasu terranes with the South China Block, and by showing the collided/amalgamated  
868 Lhasa and Qiangtang terranes north of the Neotethys ocean.

## Reviewers' Comments:

### Reviewer #1:

#### Remarks to the Author:

The authors had a positive feedback to most reviews. However, I still see the insufficient interpretation or ignored reviews that I and editor gave.

The authors give four lines of additional evidence to support the river route to the Neo-Tethys Ocean. However, unfortunately, some evidence was incorrectly used by the authors. Firstly, the marine evaporites in the Simao-Khorat Basins reach a consensus, but discharge model in the cited paper is totally misunderstood by the authors. Recent publications (in cited papers) proposed that seawater incursions were from the Meso-Tethys Ocean or proto-Paratethys Sea which came from northern part of the Simao-Khorat Basins, not from the southern Neo-Tethys Ocean. Moreover, as the authors stated that the Khorat Basin was the last stop to the Neo-Tethyan Ocean, it is absolutely impossible to form such a salt giant in the Khorat Plateau Basins in an open water mass. The Khorat Plateau Basins cover an area of ca. 247,000 km<sup>2</sup> with evaporite thickness up to 1000 m (Hite and Japakasetr, 1979, *Economic Geology*). Another evidence to deny the river court is that all publications and geological observations tell us the evaporite-bearing Maha Sarakham Formation in the Khorat Basin was lacustrine environment. So when we considered the direction of marine incursion and salt giant, it would be reasonable why the Simao-Khorat are endorheic lakes.

Secondly, in Figure S8 (Supplementary Figure 8), the authors cited the data of Carter and Moss (1999, *Geology*) and show the age distribution of the Khorat Basin from so-called late Late Cretaceous and early Paleogene. However, I checked the paper of Carter and Moss (1999) and found the youngest strata in their study is the Early Cretaceous Khok Khruat Formation. There was totally no any data of the late Cretaceous to early Paleocene.

Based on these two evidence, the river court don't convince me.

#### (1) Age constraint

The age and depositional environment cannot convince me in the revised manuscript and that is what I am concerned about. Why the age is so important and I repeatedly stress it? K2-E1 is a large time range from 100 Ma to 56 Ma and you mentioned that it was a long-term tectonic stability. In this region, at least two tectonic events identified by many geologists: 1, the mid-Cretaceous (ca. 100 Ma) tectonic event (e.g., Lovatt-Smith et al., 1996) caused by collision between Qiangtang and Lhasa; 2, the India-Asia collision at ca. 65 Ma. The first event caused unconformity in the studied basins. It's hard to imagine the existence of such a long-term tectonic stable environment.

Of course, it's hard to do the geochronology work in thick red bed basins. But in my opinion, the charophyta and ostracod fossils would give wrong age constraints compared with the U-Pb ages. This is true in the Jianchuan Basin and Simao Basin (See Gourbet et al., 2017; Yan et al., 2021). So age issue is the first priority, or it would be another story.

About the MDA, the reason that you got so few youngest zircons is inadequate zircon tests. Most samples for the U-Pb analysis in the study is n=100/150. The 'large-n' datasets (e.g., > 300 analyses per sample; Pullen et al., 2014; Daniels et al., 2018; Sundell et al., 2019a, 2019b) in order to increase the probability of analyzing young grains should be used.

#### (2) Depositional environment

The author's reply is actually not convinced me. We all know that the meandering river system typically consists of lag and sand bar deposits in the bottom and flood plain deposits showing a upward fining sequence. However, from your supplementary field photo Figure R6a and stratigraphic column Supplementary Figure 1, I cannot tell these features in the Xichang Basin. Moreover, I don't think a meandering environment that consist of a thickness of about 4,000 m of sandstone and claystones (Supplementary Figure 1) in the Xichang Basin.

For the Chuxiong Basin, I stated that "thick evaporite are occurred in the Jiangdihe Formation ". Yes, thin layers or nodules or crystals of evaporite can be formed in the arid fluvial environment. Of course, we cannot see thick evaporites in the field in the Chuxiong Basin, even in the Simao Basin and Khorat Basin since that the evaporite is easily dissolved under the tropical monsoon climate in these basins. Previous publication showed that several medium-scale salt mine of the Jiangdihe Formation were found (ref. 77). I am very curious about what the authors stated in the Supplementary Note line 211-2113 "Thus, the presence of thin evaporites is in contradiction with the existence of a low-gradient and continental-scale river system". So, what is exactly the authors' opinion?

The authors acknowledged that all stratigraphic and sedimentary work are from previous publication (in supplementary note). For the section in the Xichang Basin, the stratigraphic column (Supplementary Figure 1) is totally copied from Deng et al. (2018). Deng et al. (2018) state that "the basal member of the Xiaoba formation having 1400 m in thick changes from a fluvial environment at the base to a shallow-lacustrine facies at the top". "The second member of the Xiaoba Formation is composed of ~100 m of lacustrine red sandstone, calcareous siltstone, calcareous mudstone, and limestone (mainly at the top of the section), interbedded with gray-purple silt-stone and calcareous lenses". The third member is over 700 m thick and is primarily composed of calcareous siltstone and calcareous mudstone, interbedded with gray-purple quartz siltstone and gypsum layers, and represents a fluvial and shallow-lacustrine facies. The Paleogene Lei-dashu Formation is over 1300 m thick changes from a fluvial environment at the base to a shallow-lacustrine facies at the top. Therefore, the authors did not do sedimentary work, but they denied the lacustrine interpretation of Deng et al. (2018) even if they copied Deng's section.

Similarly, the authors copy the stratigraphic column of Deng's section in the Chuxiong Basin. However, they wrongly place the basal conglomerates of the Matoushan Formation in Deng's paper as the Jiangdihe Formation in Supplementary Figure 1. Deng et al. (2018) stated that "The Jiangdihe Formation represents a fluvial and shallow-lacustrine facies and The Zhaojiadian Formation fines upwards and represents a shallow-to-marginal lacustrine facies". However, the authors proposed fluvial+lake and floodplain+fluvial environment for the Jiangdihe and Zhaojiadian formation, respectively, without any sedimentary work.

Therefore, I easily found that the authors just simply copied two sections in the Xichang and Chuxiong basins of Deng et al. (2018). Based on my personal opinion and authors' cited publication (ref 16, Deng et al., 2018), I do prefer a fluvial and lacustrine environment during that time. It also indicates that the sedimentary environment fluctuate between fluvial and lacustrine and is not stable in such a long time range as the authors' claimed.

As for the Simao and Khorat basins, no matter the evaporite is marine or non-marine, it is impossible to form such a salt giant in an open environment (Please see Warren, 2016, *Evaporites-A Geological Compendium*). The authors claimed in the response letter line 417 to 422 that marine incursion evaporites cannot be used as an argument against a fluvial system that drained into the Neo-Tethyan Ocean. I guess the authors argued the seawater may be intruded from the Neo-Tethyan Ocean (from south to north) and thus claimed like that. However, marine incursions were not from the Neo-Tethyan Ocean, but rather from the Meso-Tethys Ocean or proto-Paratethys Sea as the cited publications (in Response letter line 14 to 15) argued. Therefore, the authors used the marine incursion evaporite to support the existence of fluvial system is unreasonable and untenable. Moreover, the lithological and sedimentary features is indicative of a typical saline lake by many publications (Hite and Japakesetr, 1979; El Tabakh et al., 1999; Zhang et al., 2013; Liu et al., 2018; Qin et al., 2020; Wang et al., 2021).

As such, the Xichang, Chuxiong, Simao, and Khorat Basins during the so called late Cretaceous to Early Paleogene is mostly lacustrine. And Simao and Khorat saline lakes were not exorheic.

(3) Provenance analysis

I suggest you put the newly added data of Simao and Khorat in the MDS plot in Supplementary Figure 6. And it is obvious that the Indochina plot so far away from your samples, indicating there was no provenance connection between them. So why do the authors' believe the fluvial system can flow to the Indochina?

#### (4) Landscape and large river system

Such a long and large river system existed in the eastern Tibetan Plateau maybe need a higher elevation and large erosion, and thus will result in enough clastic materials to transport into the Neo-Tethys Ocean. Together with the authors' claimed that there were no proximal sources, I have three concerns. (1) How can a low-relief landscape with slow exhumation and erosion (slow cooling) can supply so many clastic materials to the Neo-Tethys Ocean in such a long distance (at least 3000 km)? (2) If the river do flow into the Neo-Tethys Ocean, do the authors have any evidence of sedimentary sequence in delta and offshore Thailand?

#### (5) Sections and samples

Authors provide the GPS of all samples, however I found sample distance in the Dujiangyan section is nearly up to 30 km from Google Earth. That is absolutely not the sampling action in the same section because the Dujiangyan section only have ca. 800m in thickness. The same as the Leshan section, two sample distance is up to 21 km. So it is absolutely questionable of the sampling.

The authors acknowledged that all stratigraphic and sedimentary work in the Xichang and Chuxiong basins are from previous publication. And as I mentioned above, the stratigraphic columns in these two basins are totally copied from Deng et al. (2018).

So I doubt that the authors' sampling is consistent with the section description.

Therefore, from the authors' sampling and stratigraphic work, I have to trace back to the age of the section again. All age constraints from this study is the fossils which is done about 40 years ago.

Previous fossil results were from regional mapping at scale of 1:200,000 or type section. The studied sections are obviously not the type section, so previous results should not be applied directly. How can the regional fossils be used in whole basin?

#### (6) Standard zircons

I commented the dating results of the Standard zircons, but I cannot see correct or appropriate response. Yes, as the authors replied, the detrital zircon dating is a usual way. But for each test, your 91500 and GJ-1 zircons should generate their ages. What I asked is you should provide all the ages of 91500 and GJ-1 during your experiment, so that I can determine your deviation between the test values and recommended ages. And then I will have an idea about the reliability of all ages of the samples. So you cannot use the dating results in Yuan et al.(2004) to tell me that the ages in your study is reliable.

Reviewer #2:  
Remarks to the Author:  
Greetings,

I reviewed the revision submitted by Huiping Zhang and co-authors. All of my comments were sufficiently addressed. I support publication of this manuscript.

Andrew Laskowski

Reviewer #3:  
Remarks to the Author:  
Dear Editor and Authors,

Thanks for the detailed response to my previous comments. After reading the manuscript, I thought there are still a few problems that need to be addressed before publication.

First, the authors present a few pictures to prove a continental scale river through the basins in SE Tibet, but I suspect this. As shown in the pictures, the laminated and fine grained sandstones and mudstones are better to be interpreted in lacustrine environment, as suggested by the Reviewer 1. If the sediments were transported by a large river, we should observe some cross beddings, which are scarce in these basins.

I am also disagree with the statement that the Late Cretaceous-Paleogene sediments in Simao Basin is still marine facies. The sediments have been terrestrial since late Jurassic.

Second, I am not expert to modeling, so cannot judge the reliability of the modeling results to support a low relief at sea level before Eocene. But I am curious even there is a continental scale river flow to the Neo-Tethys Ocean, why must be a low relief existed?

Third, in recent studies, Clift et al. (2020) and Zheng et al. (2021) shown that, the Gonjo, Jianchuan, Yuanjiang, and the Northern Vietnam basins have similar provenance in the early Cenozoic, which supporting a southward-flowing river from eastern Tibet to the South China Sea. This is contrast with the figure as suggested in this manuscript. I am wondering how the authors reconcile this inconsistency.

Reviewer #4:

Review of “*Existence of a continental-scale river system in eastern Tibet during the late Cretaceous–early Palaeogene*”

I am assessing this paper on the basis of its integrated regional data, its innovative interpretations, and the potential impact of those interpretations on our understanding of some large-scale geomorphic anomalies along the eastern and SE margin of the Tibetan Plateau. This approach likely stands in contrast to some other reviewers who are more familiar with details of the local geologic-stratigraphic-petrographic-chronologic data sets that this submission exploits and builds upon. The key scientific question that this paper addresses is the origin of the widespread, high-altitude, low-relief surfaces that characterize much of the SE Tibetan Plateau: a region where local relief at present is typically quite high, with deeply incised river gorges, and rock-uplift rates are rapid in a global context. The presence of these long-lived, low-relief surfaces at rather high altitudes has long piqued our curiosity: why are they there; how did they form; what are modern analogues of their formative sequence; what data can be used to test various hypotheses?

The authors argue that, despite some coeval tectonic uplift, a long-lived, ~north-to-south river system in eastern Tibet during Late Cretaceous to Paleogene times created abundant, low-relief surfaces during a time of relative stability (or in the face of ongoing, but slow rock uplift) prior to the Indo-Aisan collision and the main Himalayan orogeny. The authors support this scenario by comparing different data sets from these terranes: contrasts in cooling histories from the proposed river corridor (versus the bounding terranes); contrasts in detrital mineral compositional abundances and U/Pb zircon cooling ages within the “drainage corridor” versus outside of it; mixing models that optimize inputs from diverse source areas in order to “match” the observed age abundances; etc.

The cooling histories of the compiled thermochronological records (Figure 1b) make a rather persuasive case that slow Late Cretaceous to Early Tertiary cooling in Songpan-Garzi and Yidun terranes contrasts markedly with the regions of significantly more rapid Late Cretaceous-Early Tertiary cooling to the east and west of these terranes. Hence, while considerable rock uplift, erosion, and bedrock cooling was going on to the east and west, during Late Cretaceous to Paleogene times, this north-south corridor in eastern Tibet appears quite stable. To support their interpretation of an integrated fluvial system draining southward to the Neotethyan ocean, the authors combine paleocurrent analysis with detrital mineralogy and detrital zircon U/Pb cooling ages to show a noteworthy consistency among dated sampling sites spanning ~600 km from north to south along the proposed fluvial corridor. For me, the match between (i) the detrital zircon ages from the Songpan-Ganzi and Yidun terranes (proposed source areas in the north) with (ii) the suite of consistent detrital zircon ages from depositional basins spanning 600-750 km from north to south provides critical support to their hypothesized drainage basin geometry and the proposed timing of its existence as an integrated depositional system. To me, this spatial-temporal consistency is a key factor supporting the interpretation offered by these authors.

I suspect that, for some readers, examination of the extensive supplementary data will be needed to convince them of the validity of the authors’ hypotheses. I find both (1) their multi-dimensional scaling plots of detrital data sets and potential source areas and (2) their modeled relative contributions from potential source areas quite persuasive.

I note that previous reviews brought up many specific issues and questions, commonly related to the characteristics of a given source area and an alternative interpretation. I am not



qualified to judge the merits (or validity) of these objections. But, I did find that this contribution's authors gave quite convincing justifications for their choices and interpretations.

Overall, this provocative, innovative synthesis and interpretation provides a potential resolution to a long-standing problem related to how these low-relief, high-elevation surfaces in SE and Eastern Tibet developed. I believe it is worthwhile to get this data set and interpretation "out there" for the interested audience to contemplate and to try to test with new data or re-analysis. I also think that the "problem" that this paper addresses is a long-standing and puzzling one: a problem that has come into clearer focus in recent decades as (i) high-resolution digital topography has become available of even remote or restricted areas (thereby enabling clear topographic syntheses, comparisons across regions, and identification of "anomalies") and (ii) as high-resolution, low-cost, and high-throughput analytical techniques have enabled thousands of analyses to be made and synthesized, and (iii) as improved and diversified numerical modeling approaches have enabled more rigorous evaluation of hypotheses. This contribution from the edge of Tibet exploits all of these technologies in a creative synthesis that is sure to inspire (and provoke) further research focused on the evolution of large-scale dynamic orogens.

Note to editors/authors: I show my "linguistic/grammatical/clarification" suggestions below in red text.

58 Note that the Yangtze River is not identified/labelled in any figure that I could find!

99 "**comprise**" means "to be composed of" So eastern Tibet comprises these provinces, not the other way around.

119 with sustained ~~topography~~ **topographic relief**

120 **SUCH** regional differences in erosion/exhumation rates could be explained by a

127 along the foredeep depozone (i.e., SW Sichuan, Xichang, Huili, and Chuxiong basins: **Fig. 1a**)

139-41 ~~Several meters to tens of meters~~ "Thick, cross-stratified sandstone beds ~~with cross-~~

~~stratification~~ represent channel deposits of southward-flowing, low-**energy** ("energy" or "gradient"?) rivers ~~and associated floodplains, and/or exorheic lakes~~ I don't think that

crevasse splays or lake deposits should be cited as indicative of overall paleocurrent directions for large river systems, especially for thick sandstone deposits. What indicates that these rivers are "low-energy"? Are there complete channel cross sections and longitudinal sections to enable you to deduce "energy" versus gradient or simply associated grain size?

148 "**Leshan section**" in the Sichuan Basin, (given that the Leshan section is not identified in the figure.

164 "**genuine**"?? Does this mean "**statistically significant**"?

173-5 "The consistent provenance signal from the different basins **requires** the existence of a continuous fluvial system during the late Cretaceous–early Palaeogene." Does it truly "**require**"? That may well be the most likely scenario, but it doesn't "require" this scenario, in my opinion.

367 showing main tectonic units "**(red text)**" (in reference to what represents these units in the figure) and major river systems (except for the Yangtze! **Add a label for this river!**)

370 low-relief plateau areas<sup>24,31–34,36,58</sup>. New suggested text: **Hexagons indicate sites with Cretaceous-Tertiary cooling histories (shown in 1B)** Dashed

### Comments on Figures

Figure 1a. Nowhere is the Yangtse River labeled on this figure. Its name should be clearly identified. Note that in the figure caption, no description is given of the light blue vertical band from 40-50 Ma in Fig 1b. What is that? I presume it's a proposed "boundary" between rapid L Cret-Paleocene cooling versus post-50-Ma rapid cooling. Why not add blue or red labels for rapid cooling pre-50 Ma and post-40 Ma, respectively? I also note that the chosen level of transparency of some of the "yellow" low-relief surfaces makes these surfaces appear to be a different color (more orange than yellow, where superimposed above the orange swath), and that there is a strange (inconsistent?) mix of yellow and orange surfaces just above the red "5" in the figure. These issues should all be readily corrected. Could a label be added to the orange region so that it's more self-explanatory? Similarly, a label on the blue-dashed line ("hypothesized drainage divide") would make its significance more obvious.

Figure 1b. Add a legend indicating blue lines for rapid cooling prior to 50 Ma, versus red lines for rapid cooling since 50 Ma.

Figure 2. How about helping your readers along with a title box, "Drainage Scenarios" and cryptic summary titles for each scenario's panel?

Figure 3. The rationale is unstated for the red and blue lines for the probability density functions. Please make that clear!

### Comments on Supplemental Figures

Supp Figure 3. Illustrative and quite compelling figure!! Spell out the names of the sections (CX, HL, etc) for each group of samples.

## 1 **Response letter**

2 In this letter we will provide our detailed response (in blue text) to the comments of the editor  
3 and the four reviewers (in black) and explain all changes performed on the manuscript.

## 4 **Response to the comments of the four reviewers**

### 5 **Reviewer #1**

6 The authors had a positive feedback to most reviews. However, I still see the insufficient  
7 interpretation or ignored reviews that I and editor gave.

8 (1) The authors give four lines of additional evidence to support the river route to the  
9 Neo-Tethys Ocean. However, unfortunately, some evidence was incorrectly used by the  
10 authors. Firstly, the marine evaporites in the Simao-Khorat Basins reach a consensus, but  
11 discharge model in the cited paper is totally misunderstood by the authors. Recent  
12 publications (in cited papers) proposed that seawater incursions were from the Meso-Tethys  
13 Ocean or proto-Paratethys Sea which came from northern part of the Simao-Khorat Basins,  
14 not from the southern Neo-Tethys Ocean.

15 **Reply:** As the reviewer#1 points out correctly, the marine origin of Late Cretaceous–early  
16 Palaeogene evaporite in the Simao-Khorat Basins has reached a consensus. This clearly  
17 indicates that, as we have emphasized in the main text, these areas were close to sea level at  
18 that time. Although Wang et al., (2021) has inferred that the seawater likely originated from  
19 the proto-Paratethys Sea to the northwest, these authors also proposed an alternative  
20 hypothesis that marine incursions were from the Neo-Tethyan Ocean to the southwest (Wang  
21 et al., 2015). In addition, the proto-Paratethys Sea-derived model is subject to debate, because  
22 it cannot explain the present perception that the Cretaceous marine strata were disrupted  
23 between the Qiangtang and the Simao-Khorat Basins (Qin et al., 2020). About the model of  
24 “Meso-Tethys Ocean-derived” proposed by Qin et al. (2020), we infer this just reflects  
25 ambiguity about the use of this name for “Tethys Ocean” because it is generally believed that  
26 the Meso-Tethys Ocean had closed before the late Cretaceous (see Kapp et al., 2019, Li et al.,  
27 2019 for reviews; as shown the Figure 38 in Metcalfe, 2021). Overall, we originally showed  
28 the existence of marine evaporates in the Simao-Khorat Basins through the two studies (Qin  
29 et al., 2020; Wang et al., 2021).

30 About the source of paleo-seawater, Qu (1997) proposed that paleo-seawater recharged  
31 from the south to the north based on the similar stratigraphic ages, sedimentary features,  
32 mineral sequences, and solute sources of the evaporites between the Simao and Khorat Basin.  
33 Moreover, the thickness of the late Cretaceous evaporate formation in the Khorat Basin is  
34 apparently thicker than that in the Simao basin (e.g., Zhang et al., 2018, Yan et al., 2021a, Yan  
35 et al., 2021b). These observations, coupled with the reconstructed block-tectonic pattern  
36 during the late Cretaceous–early Paleogene (e.g., Boucot et al., 2009; Poblete et al., 2021;  
37 Metcalfe, 2021), it is proposed that that the seawater originated from the Neo-Tethys Ocean to  
38 the south or southwest during sea intrusion episodes (Qu, 1997; El Tabakh et al., 1999; Wang  
39 et al., 2015; Rattana et al., 2021). We have clarified and improved our discussion of this issue  
40 in the revised manuscript (see lines 233–243).

41

### 42 **References:**

- 43 Boucot A J, Chen X, Scotese C R, Fan J X. 2009. Phanerozoic Paleoclimate: An Atlas of Lithologic  
44 Indicators of Climate. Beijing: Science Press. 173.  
45 El Tabakh, M., Utha-Aroon, C. & Schreiber, B.C. Sedimentology of the Cretaceous Maha Sarakham  
46 evaporites in the Khorat Plateau of northeastern Thailand. *Sediment. Geol.* **123**, 31–62 (1999).  
47 Metcalfe, I. Multiple Tethyan ocean basins and orogenic belts in Asia. *Gondwana Research*, **in press**,  
48 (2021).  
49 Li, S., Yin, C., Guilmette, C., Ding, L., & Zhang, J. Birth and demise of the Bangong-Nujiang Tethyan

- 50 ocean: a review from the Gerze area of central Tibet. *Earth-Science Reviews*, **198**, 102907 (2019).
- 51 Kapp, P., Decelles, P. G. Mesozoic-Cenozoic geological evolution of the Himalayan-Tibetan orogen  
52 and working tectonic hypotheses. *American Journal of Science*, **319**, 159–254 (2019).
- 53 Poblete, F., Dupont-Nivet, G., Licht, A., Hinsbergen, D., & Baatsen, M. Towards interactive global  
54 paleogeographic maps, new reconstructions at 60, 40 and 20 Ma. *Earth-Science Reviews*, **214**,  
55 103508 (2021).
- 56 Qin, Z., Li, Q., Zhang, X. G., Fan, Q. S., Wang, J. P., Du, Y. S., Ma, Y. Q., Wei, H. C., Yuan, Q. &  
57 Shan, F. S. Origin and recharge model of the Late Cretaceous evaporites in the Khorat Plateau. *Ore*  
58 *Geol Rev.* **116**, 103226 (2020).
- 59 Qu, Y.H. On affinity of potassium bearing brine in Lanping-Simao basin, China to that in Ale basin,  
60 Thailand, and location of target areas for potassium hunting in former basin. *Geol. Chem. Miner.* **19**  
61 (2), 81–85 (1997) (in Chinese with English abstract).
- 62 Rattana, P., Choowong, M., He, M.-Y., Tan, L., Lan, J., Bissen, R., Chawchai, S., Geochemistry of  
63 evaporitic deposits from the Cenomanian (Upper Cretaceous) Maha Sarakham Formation in the  
64 Khorat Basin, northeastern Thailand. *Cretaceous Research*, in press (2021)
- 65 Wang, L. C., Zhong, Y. S., Xi, D. P., Hu, J. F. & Ding, L. The Middle to Late Cretaceous marine  
66 incursion of the Proto-Paratethys sea and Asian aridification: A case study from the Simao-Khorat  
67 salt giant, southeast Asia. *Palaeogeogr Palaeoclimatol Palaeoecol.* **567**, 110300 (2021).
- 68 Wang, L. C., Liu, C, Fei, M, Shen, L, Zhang, H, Zhao, Y. First shrimp U-Pb zircon ages of the  
69 potash-bearing Mengyejing Formation, Simao Basin, southwestern Yunnan, China. *Cretac Res.* **52**,  
70 238–250 (2015).
- 71 Yan, M. D., Zhang, D. W., Fang, X. M., Zhang, W. L., Song, C. H et al. New Insights on the age of the  
72 Mengyejing formation in the Simao basin, SE Tethyan domain and its geological implications. *Sci*  
73 *China Earth Sci.* **64**, 231–252 (2021a).
- 74 Yan, M. D., Zhang, D. W., Li, M. H. New Progresses on the Potash Deposits in the Simao and Khorat  
75 Basins: A Synthesis. *Earth Science Frontier*, *in press*, (2021b).
- 76 Zhang D., Yan M., Fang X., Yang Y., Zhang T., Zan J., Zhang W., Liu, C & Yang Q.  
77 Magnetostratigraphic study of the potash-bearing strata from drilling core ZK2893 in the Sakon  
78 Nakhon Basin, eastern Khorat Plateau. *Palaeogeogr Palaeoclimatol Palaeoecol.* **489**, 40–51  
79 (2018).

80  
81 (2) Moreover, as the authors stated that the Khorat Basin was the last stop to the Neo-Tethyan  
82 Ocean, it is absolutely impossible to form such a salt giant in the Khorat Plateau Basins in an  
83 open water mass. The Khorat Plateau Basins cover an area of ca. 247,000 km<sup>2</sup> with evaporite  
84 thickness up to 1000 m (Hite and Japakasetr, 1979, Economic Geology). Another evidence to  
85 deny the river court is that all publications and geological observations tell us the  
86 evaporite-bearing Maha Sarakham Formation in the Khorat Basin was lacustrine environment.  
87 So when we considered the direction of marine incursion and salt giant, it would be  
88 reasonable why the Simao-Khorat are endorheic lakes.

89 **Reply:** We respectfully disagree with the referee on this as they appear to have misinterpreted  
90 Hite and Japakasetr (1979). Hite and Japakasetr, (1979) definitely stated that “*The potash*  
91 *deposits of the Khorat Plateau are in the Maha Sarakham Formation of Cretaceous age. This*  
92 *formation is present only on the Khorat Plateau. North, in the Sakon Nakhon Basin, the*  
93 *formation extends over an area of about 21,000 km<sup>2</sup>. South, in the Khorat Basin, the*  
94 *formation covers a slightly larger area of about 36,000 km<sup>2</sup>. The maximum thickness of the*  
95 *formation in either basin is unknown, but it could exceed 1,000 m”*. This sentence just shows  
96 that the thickness of the Maha Sarakham Formation is up to 1000 m, and does not mention the  
97 thickness of evaporate deposits. In fact, the evaporite thickness from the late Cretaceous–early  
98 Paleogene Maha Sarakham Formation in most areas of the Khorat Plateau is only tens to  
99 hundred of meters according to a collection of bore documents (see Hite and Japakasetr, 1979;  
100 Rattana et al., 2021, in press).

101 In terms of the formation mechanism of evaporites in the Khorat Plateau Basins, in  
102 addition to hydrological conditions, the coupling of regional aridity and global

103 high-temperature events, along with eustatic change would have further promoted the  
104 formation of potash salts (Liu et al., 2018; Yan et al., 2021). According to previous studies, if  
105 this sea is located in a low-latitude setting and especially if it straddles the belt of  
106 high-pressure dry air, evaporation can result in the formation of a major evaporite deposits in  
107 continental margin/shelf settings (e.g., narrow seas, tidal flats, lagoons) (Reynolds and Johnson,  
108 2019; Miall, 2016; as shown the figure below in p. 240 of Reynolds and Johnson, 2019). Thus,  
109 it is likely that major salt-bearing sub-basins / depressions in the Khorat Plateau represent  
110 several lagoons or tidal flats during low sea level episodes, and the large-scale river system  
111 may flow to the sea near these tidal flats or lagoons (resembling landscape referred to the  
112 figure in p. 76-77 of Reynolds and Johnson, 2019; modified Fig. 4b).

113 We have never denied the occurrence of lacustrine environments. Rather, several lines of  
114 evidence below clearly corroborate a co-existence of fluvial and/or delta-plain environments  
115 in the Khorat basins during the late Cretaceous–early Paleogene: (i) we note that “*The*  
116 *non-marine red beds interbedded with the evaporites are fluvial or alluvial deposits and*  
117 *include displacive anhydrite nodules and beds and displacive halite in cubic forms*”; and  
118 “*Siliciclastics from the Maha Sarakham Formation in the Khorat Basin are composed of*  
119 *alternating cross-bedded siltstones and massive mudstones of fluvial origin, suggesting fluvial*  
120 *deposition in the basin province*” cited from El Tabakh et al., (1999, p. 54, 59). The two  
121 sentences from El Tabakh et al., (1999) support the existence of a fluvial depositional  
122 environment for upper Cretaceous–lower Paleogene strata in the Khorat basins, even though  
123 lacustrine environments may be more extensive. Similarly, the late Cretaceous Maha  
124 Sarakham Formation in northeastern Thailand consists of red to reddish-brown, fine-grained,  
125 laminated and small-scale cross-bedded sandstones interbedded with siltstones and mudstones  
126 with disseminated salts and gypsum (Meesook, 2000), which was interpreted as a meandering  
127 river system, even if evaporitic conditions also prevailed (Meesook, 2000). (ii) Sedimentary  
128 structures in mudstones such as mudcracks, chaotic textures, root structures and burrows  
129 suggest a subaerial setting (El Tabakh et al., 1999). (iii) A widespread and dominantly  
130 south-directed paleocurrent from the alternating thin mudstone and sandstone beds of the late  
131 Cretaceous units in the Khorat basins provides additional physical evidence corroborating the  
132 existence of a south-flowing sediment routing system (Heggemann et al., 1992; Singsoupho et  
133 al., 2015). (iv) Isotope measurement results of potash deposits suggest that a terrestrial input  
134 or riverine water had entered into the Khorat Plateau when the potash deposits were  
135 precipitating (El Tabakh et al., 1999; Zhang et al., 2013), which likely has a close relationship  
136 with the influence of fluvial influx (Zhang et al., 2013). Of course, our interpretation of a  
137 hydrologic connection between the Khorat Basin and the Neo-Tethyan Ocean does not  
138 preclude a more complex drainage configuration, involving the assembly of multiple channels  
139 along a near south-to-north major route. More detailed provenance analyses of Upper  
140 Cretaceous samples from the Khorat basin may further test this hypothesis to constrain a more  
141 complete drainage configuration of the proposed large river. We have included part of this  
142 evidence in the revised manuscript (lines 228–233).

143 From the perspective of provenance data, the late Cretaceous–early Paleogene deposits  
144 in the Simao Basin and Muang Xai Basin to the south have widely been proposed to be  
145 mainly from the Songpan-Ganzi Yidun, and Qiangtang terranes, rather than proximal source  
146 areas (e.g., Indosinian terrane) (Wang et al., 2014; Wang et al., 2017; Chen et al., 2017; Yan et  
147 al., 2021). In other words, if the Simao and Muang Xai Basins were endorheic basins during  
148 the late Cretaceous–early Paleogene as suggested by reviewer #1, K<sub>2</sub>–E<sub>1</sub> sediments in the two

149 basins must be derived from surrounding older rocks, and we would expect the widespread  
150 Triassic metamorphic rocks surrounding these basins to provide a major source of detrital  
151 material and a unique prominent peak at 200–250 Ma (Fig. S4). However, previously  
152 published detrital zircon data from late Cretaceous–early Paleogene samples of the two basins  
153 show strikingly consistent peaks at 200–300 Ma, 390–480 Ma, 700–900 Ma, 1700–2000 Ma,  
154 and 2300–2600 Ma (Wang et al., 2014; Wang et al., 2017; Chen et al., 2017; Yan et al., 2021;  
155 Fig. S8). This strongly suggests the Simao and Muang Xai Basins were not endorheic basins  
156 in the late Cretaceous–early Paleogene, but were connected to a transcontinental drainage  
157 system that linked central–eastern Tibet with the two basins (Wang et al., 2014; Wang et al.,  
158 2017; Chen et al., 2017; Yan et al., 2021). Although no detrital zircon data from K<sub>2</sub>–E<sub>1</sub>  
159 sediments in the Khorat basin have been reported to date, a dominantly south-directed  
160 paleocurrent from the sandstone beds in the late Cretaceous Maha Sarakham Formation in the  
161 Khorat Basin provides additional physical evidence for a south-flowing sediment transport  
162 pathway (Heggemann et al., 1992; Singsoupho et al., 2015).

163 Based on the collective weight of stratigraphic and sedimentologic observations  
164 described above, we contend that the deposits in the Khorat Basin do not preclude our  
165 hypothesis that a continental-scale river system discharged into the the Neo-Tethyan Ocean  
166 near what is now the Khorat Basin (see Figure 4), even though the major paleo-channels  
167 cannot be traced due to post-depositional modification and later erosion.

#### 168 **References:**

- 169 Chen, Y., Yan, M., Fang, X., Song, C., Zhang, W., Zan, J. et al. Detrital zircon U-Pb geochronological  
170 and sedimentological study of the Simao Basin, Yunnan: Implications for the early Cenozoic  
171 evolution of the Red River. *Earth Planet. Sci. Lett.* **476**, 22–33 (2017).  
172 Heggemann, H., Helmcke, D., & Tietze, K. W. Sedimentary evolution of the Mesozoic Khorat basin in  
173 Thailand. *Zentralblatt für Geologie und Paläontologie*, 11–12, 1267–1285 (1992).  
174 Hite, R.J. & Japakasetr, T. Potash deposits of Khorat Plateau, Thailand and Laos. *Econ. Geol.* **74**, 448–  
175 458 (1979).  
176 Liu, C.L., Wang, L.C., Yan, M.D., Zhao, Y.J., Cao, Y.T., Fang, X.M., Shen, L.J., Wu, C.H., Lv, F.L. &  
177 Ding, T. The Mesozoic–Cenozoic tectonic settings, paleogeography and evaporitic sedimentation of  
178 Tethyan blocks within China: implications for potash formation. *Ore Geol. Rev.* **102**, 406–425  
179 (2018).  
180 Meesook, A. Cretaceous environments of northeastern Thailand. *Developments in Palaeontology &*  
181 *Stratigraphy*, **17** (2000).  
182 Miall, A. D. (2016). *Facies Models*. Switzerland: Springer International Publishing, p206.  
183 Wang, L. C., Liu, C., Gao, X. & Zhang H. Provenance and paleogeography of the Late Cretaceous  
184 Mengyejing Formation, Simao Basin, southeastern Tibetan Plateau: Whole-rock geochemistry,  
185 U-Pb geochronology, and Hf isotopic constraints. *Sedimentary Geol.* **304**, 44–58 (2014).  
186 Wang, Y. L., Wang, L. C., Wei, Y. S., Shen, L. J., Chen, K., Yu, X. C. & Liu, C. L. Provenance and  
187 paleogeography of the Mesozoic strata in the Muang Xai basin, northern Laos: petrology,  
188 whole-rock geochemistry, and U–Pb geochronology constraints. *Int J Earth Sci.* **106**, 1409–1427  
189 (2017).  
190 Rattana, P., Choowong, M., He, M.-Y., Tan, L., Lan, J., Bissen, R., Chawchai, S., Geochemistry of  
191 evaporitic deposits from the Cenomanian (Upper Cretaceous) Maha Sarakham Formation in the  
192 Khorat Basin, northeastern Thailand. *Cretaceous Research*, in press (2021).  
193 Reynolds and Johnson (2019). *Exploring earth science*. New York: McGraw-Hill Education,  
194 p.76-77, 240.  
195 Singsoupho S, Bhongsuwan T, Elming S Å. Palaeocurrent direction estimated in Mesozoic redbeds of  
196 the Khorat Plateau, Lao PDR, Indochina Block using anisotropy of magnetic susceptibility.  
197 *Journal of Asian Earth Sciences*, **106**, 1–18 (2015).  
198

199 Yan, M. D., Zhang, D. W., Fang, X. M., Zhang, W. L., Song, C. H et al. New Insights on the age of the  
200 Mengyejing formation in the Simao basin, SE Tethyan domain and its geological implications.  
201 *Sci China Earth Sci.* **64**, 231–252 (2021).

202 Zhang, X.Y., Ma, H.Z., Ma, Y.Q., Tang, Q.L. & Yuan, X.L. Origin of the late Cretaceous  
203 potash-bearing evaporites in the Vientiane Basin of Laos:  $\delta^{11}\text{B}$  evidence from borates. *J. Asian*  
204 *Earth Sci.* **62**, 812–818 (2013).

205 (3) Secondly, in Figure S8 (Supplementary Figure 8), the authors cited the data of Carter and  
206 Moss (1999, Geology) and show the age distribution of the Khorat Basin from so-called late  
207 Late Cretaceous and early Paleogene. However, I checked the paper of Carter and Moss (1999)  
208 and found the youngest strata in their study is the Early Cretaceous Khok Khruat Formation.  
209 There was totally no any data of the late Cretaceous to early Paleocene. Based on these two  
210 evidence, the river court don't convince me.

211 **Reply:** We thank the reviewer for catching this oversight regarding the age of the Khorat  
212 Group (Carter and Moss, 1999). We have removed this from our compilation of detrital zircon  
213 in a modified Fig. S8. Fortunately, this does not impact our interpretations.

214 (4) The age and depositional environment cannot convince me in the revised manuscript and  
215 that is what I am concerned about. Why the age is so important and I repeatedly stress it?  
216 K2-E1 is a large time range from 100 Ma to 56 Ma and you mentioned that it was a long-term  
217 tectonic stability. In this region, at least two tectonic events identified by many geologists: 1,  
218 the mid-Cretaceous (ca. 100 Ma) tectonic event (e.g., Lovatt-Smith et al., 1996) caused by  
219 collision between Qiangtang and Lhasa; 2, the India-Asia collision at ca. 65 Ma. The first  
220 event caused unconformity in the studied basins. It's hard to imagine the existence of such a  
221 long-term tectonic stable environment.

222 **Reply:** We must emphasize that it has been widely appreciated that the final collision between  
223 the Qiangtang and Lhasa terranes occurred in the Early Cretaceous (~130–120 Ma) (e.g.,  
224 Kapp et al., 2005; Li et al., 2019; also see Figure 7(G), 7 (H) in Kapp et al., 2019). Moreover,  
225 Cretaceous shortening, basin deformation, and magmatism activities mainly occurred in the  
226 central Tibetan plateau due to northward underthrusting of the Lhasa terrane beneath the  
227 Qiangtang terrane along the Bangong suture during low-angle subduction of Neo-Tethys  
228 oceanic lithosphere (e.g., Kapp et al., 2005, 2019; Rohrmann et al., 2012; Li et al., 2019). This  
229 region is well to the west of our study area. With respect to eastern Tibet, there is no clear  
230 evidence for an obvious erosion surface between the early and late Cretaceous horizons in the  
231 studied basins (~100 Ma), and contacts are likely conformable. More importantly, as reviewer  
232 #1 acknowledged, we proposed a prolonged tectonic stability in eastern Tibet from late  
233 Cretaceous to early Paleogene (<100 Ma–50 Ma). Thus, even if there was a transient tectonic  
234 event in the mid-Cretaceous (> 100 Ma), this would be fully compatible with our  
235 interpretation and conclusions.

236 Although discussion still persists, a growing number studies have consistently agreed  
237 that the initial timing of the India-Asia collision (or collision of India with an intra-Tethyan  
238 island arc) is between ~60 Ma and 50 Ma (e.g., Tapponnier et al., 2001; Najman et al., 2010;  
239 DeCelles et al., 2014; Martin et al., 2020; An et al., 2021; Yuan et al., 2021). But please note  
240 that the convergence rate began to rapidly decrease after the onset of the India-Asia collision  
241 (Copley et al., 2010; van Hinsbergen et al., 2011), thus the main crustal thickening of a large  
242 part of Tibet occurred later (e.g., Tapponnier et al., 2001; Cao et al., 2020). For example, the  
243 strong south-north compression in the central TP and the continuous north-ward subduction of  
244 the Indian lithosphere mainly occurred between 50 and 34 Ma (Kapp et al., 2019; Lin et al.,  
245 2020; Wang et al., 2008; Wang et al., 2014). Back to our study, the large-scale tectonic

246 deformation of eastern Tibet occurred during the post-collision of India with Asia. Based on  
247 low-temperature thermochronology (e.g., Zhang et al., 2016; Wang et al., 2012),  
248 paleoaltimetry (e.g., Hoke et al., 2014; Xiong et al., 2020), and recent paleomagnetism studies  
249 (Tong et al., 2017; Zhang et al., 2020), significant tectonic deformation and uplift on the  
250 eastern margin of the Tibetan plateau and the western margin of the South China block have  
251 widely been acknowledged to occur later than the middle Eocene. In addition, the widespread  
252 magmatic activities at ~40–30 Ma in eastern Tibet also suggest a diachronous uplift history  
253 for the Tibetan plateau (Chung et al., 1998). Thus, the initial India-Asia collision at ca. 60–50  
254 Ma did not immediately affect the region of eastern Tibet studied here.

255

## 256 **References:**

- 257 An, W., Hu, X., Garzanti, E., Wang, J. G., & Liu, Q. New precise dating of the India-Asia collision in  
258 the Tibetan Himalaya at 61 Ma. *Geophysical Research Letters*, **48**, e2020GL090641 (2021).
- 259 Cao, K., Leloup, P. H., Wang, G. C., Liu, W., Mahéo, G., Shen T. Y., Xu, Y.D., Sorrel, P. & Zhang, K.  
260 X. Thrusting, exhumation, and basin fill on the western margin of the South China block during  
261 the India-Asia collision. *Geol. Soc. Am. Bull.* **133**, 74–90 (2020).
- 262 Chung, S., Lo, C. H., Lee, T. Y., Zhang, Y. Q., Xie, Y. W., Li, X. H., et al. Diachronous uplift of the  
263 Tibetan plateau starting 40 Myr ago. *Nature*, **394**, 769–773 (1998).
- 264 Copley, A., Avouac, J. P., & Royer, J. Y. India-Asia collision and the Cenozoic slow-down of the  
265 Indian plate: Implications for the forces driving plate motions. *Journal of Geophysical Research*,  
266 **115**, B03410 (2010).
- 267 DeCelles, P., Kapp, P., Gehrels, G., & Ding, L. Paleocene-Eocene foreland basin evolution in the  
268 Himalaya of southern Tibet and Nepal: Implications for the age of initial India-Asia collision.  
269 *Tectonics*, **33**, 824–849 (2014).
- 270 Hoke, G. D., Liu-Zeng, J., Hren, M. T., et al. Stable isotopes reveal high southeast Tibetan Plateau  
271 margin since the Palaeogene. *Earth and Planetary Science Letters*, **394**, 270–278 (2014).
- 272 Kapp, P., Yin, A., Harrison, T. M., & Ding, L. Cretaceous-Tertiary shortening, basin development, and  
273 volcanism in Central Tibet. *Geological Society of America Bulletin*, **117**(7–8), 865–878 (2005).
- 274 Kapp, P., Decelles, P. G. Mesozoic-Cenozoic geological evolution of the Himalayan-Tibetan orogen  
275 and working tectonic hypotheses. *American Journal of Science*, **319**, 159–254 (2019).
- 276 Li, S., Yin, C., Guilmette, C., Ding, L., & Zhang, J. Birth and demise of the Bangong-Nujiang Tethyan  
277 ocean: a review from the Gerze area of central Tibet. *Earth-Science Reviews*, **198**, 102907 (2019).
- 278 Lin, J., Dai, J. G., Zhuang, G. S., Jia, G. D., Zhang, L. M., Ning, Z., et al. Late Eocene–Oligocene high  
279 relief paleotopography in the north central Tibetan Plateau: Insights from detrital zircon U–Pb  
280 geochronology and leaf wax hydrogen isotope studies. *Tectonics*, **39**, e2019TC005815(2020).
- 281 Martin, C. R., Jagoutz, O., Upadhyay, R., Royden, L. H., Eddy, M. P., Bailey, E., et al. Paleocene  
282 latitude of the Kohistan–Ladakh arc indicates multistage India–Eurasia collision. *PNAS*,  
283 11729487–29494 (2020).
- 284 Najman, Y., Appel, E., Boudagher-Fadel, M., Bown, P., Carter, A., Garzanti, E., et al. Timing of  
285 India-Asia collision: Geological, biostratigraphic, and paleomagnetic constraints. *Journal of*  
286 *Geophysical Research*, **115**, B12416 (2010).
- 287 Rohrmann, A., Kapp, P., Carrapa, B., Reiners, P. W., Guynn, J., Ding, L. & Heizler, M.  
288 Thermochronologic evidence for plateau formation in central Tibet by 45 Ma. *Geology* **40**, 187–  
289 190 (2012).
- 290 Tapponnier, P., Zhiqin, X., Roger, F., Meyer, B., Arnaud, N., Wittlinger, G., & Jingsui, Y. Oblique  
291 stepwise rise and growth of the Tibet plateau. *Science*, **294**, 1671–1677 (2001).
- 292 Tong, Y., Yang, Z., Mao, C., Pei, J., Pu, Z., Xu, Y., 2017. Paleomagnetism of Eocene red-beds in the  
293 eastern part of the Qiangtang Terrane and its implications for uplift and southward crustal  
294 extrusion in the southeastern edge of the Tibetan Plateau. *Earth Planet. Sci. Lett.* **475**, 1–14.
- 295 Van Hinsbergen, D. J. J., Steinberger, B., Doubrovine, P. V., & Gassmoller, R. Acceleration and  
296 deceleration of India-Asia convergence since the Cretaceous: Roles of mantle plumes and  
297 continental collision. *Journal of Geophysical Research*, **116**, B06101 (2011).
- 298 Wang, E., Meng, K., Su, Z., Meng, Q., Chu, J. J., Chen, Z., et al. Block rotation: Tectonic response of  
299 the Sichuan basin to the southeastward growth of the Tibetan plateau along the Xianshuihe-



300 Xiaojiang fault. *Tectonics*, **33**, 686–718 (2014).  
301 Wang, C. S., Zhao, X. X., Liu, Z. F., Lippert, P. C., Graham, S. A., Coe, R. S., et al. Constraints on the  
302 early uplift history of the Tibetan Plateau. *Proceedings of the National Academy of Sciences*, **105**,  
303 4987–4992 (2008).  
304 Xiong, Z. Y., Ding, L., Spicer, R. A., et al. The early Eocene rise of the Gonjo Basin, SE Tibet: From  
305 low desert to high forest. *Earth and Planetary Science Letters*, **543**, 116312 (2020).  
306 Yuan, J., Yang, Z., Deng, C., Krijgsman, W., Hu, X., Li, S., et al. Rapid drift of the Tethyan Himalaya  
307 terrane before two-stage India-Asia collision. *National Science Review*, **8**, 173 (2021).  
308 Zhang, H. P., Oskin, M. E., Liu-Zeng, J., Zhang, P. Z., Reiners, P. W. & Xiao, P. Pulsed exhumation of  
309 interior eastern Tibet: implications for relief generation mechanisms and the origin of  
310 high-elevation planation surfaces. *Earth Planet. Sci. Lett.* **449**, 176–185 (2016).  
311 Zhang, W., Fang, X., Zhang, T., Song, C., & Yan, M. Eocene rotation of the northeastern central  
312 Tibetan Plateau indicating stepwise compressions and eastward extrusions. *Geophysical Research*  
313 *Letters*, **47**, e2020GL088989 (2020).

314

315 (5) Of course, it's hard to do the geochronology work in thick red bed basins. But in my  
316 opinion, the charophyta and ostracod fossils would give wrong age constraints compared with  
317 the U-Pb ages. This is true in the Jianchuan Basin and Simao Basin (See Gourbet et al., 2017;  
318 Yan et al., 2021). So age issue is the first priority, or it would be another story.

319 **Reply:** The Jianchuan Basin is a middle-late Eocene intracontinental basin in eastern Tibet,  
320 whose basin property, depositional age, lithologic and facies features, and subsidence  
321 mechanism are totally different from those of the basins we study (Gourbet et al., 2017;  
322 Zheng et al., 2020; Feng et al., 2021). More significantly, please note that a dispute regarding  
323 age scheme of the Cenozoic sedimentary sequences in the Jianchuan Basin stems from  
324 absolute ages of the Shuanghe, Jianchuan, and Jiuziyuan Formations. Previously estimated  
325 ages of the three formations were mainly based on plant fossils, bivalves, gastropods, and  
326 nanofossils, rather than charophyte, or ostracod. Instead, ages of the underlying Paleocene  
327 Yunlong and Eocene Baoxiangsi Formations in the Jianchuan Basin were initially estimated  
328 by characteristic charophyte, and ostracod assemblages, which is well in agreement with  
329 recent magnetostratigraphic and radiochronologic dating results (Fang et al., 2021). Thus,  
330 taking an example of the Jianchuan Basin to question the age scheme presented this study is  
331 untenable.

332 The Mengyejing Formation in the Simao Basin has been dated at ~112–63 Ma using  
333 magnetostratigraphic method (Yan et al., 2021), largely in agreement with the previously  
334 reported palaeontological results (i.e., Ostracod, Charophyte fossils, and Sporopollen) (as  
335 shown the Figure 10 of Yan et al., 2021). Similarly, the Guankou and Mingshan Formations  
336 of the Shiyang section in the southwestern Sichuan Basin has been dated at ~84–43 Ma using  
337 the magnetostratigraphic method (Shen et al., 2018, Master thesis), which is also largely  
338 consistent with the biostratigraphic age of these deposits. Taken together, we argue that the  
339 charophyta and ostracod assemblages provide reasonable information on the depositional age  
340 of our studied sedimentary sections, especially given that most geochronology methods are  
341 impracticable for dating these deposits, as acknowledged by reviewer #1.

#### 342 **References:**

343 Fang, X. M., Yan, M. D., Zhang, W. L., et al. Paleogeography control of Indian monsoon  
344 intensification and expansion at 41 Ma. *Science Bulletin*, in press (2021).  
345 Gourbet, L., Leloup, P.H., Paquette, J., et al. Reappraisal of the Jianchuan Cenozoic basin stratigraphy  
346 and its implications on the SE Tibetan Plateau evolution. *Tectonophysics* **700**, 162–179 (2017).  
347 Shen, Q. Cretaceous–Cenozoic magnetostratigraphy study in southwestern Sichuan Basin and its

348 geological significance. Master thesis in the Northwest University (2018).  
349 Yan, M. D., Zhang, D. W., Fang, X. M., Zhang, W. L., Song, C. H et al. New Insights on the age of the  
350 Mengyejing formation in the Simao basin, SE Tethyan domain and its geological implications.  
351 *Sci China Earth Sci.* **64**, 231–252 (2021).  
352 Zheng, H. B., Clift, P. D., He, M. Y., et al. Formation of the First Bend in the late Eocene gave birth to  
353 the modern Yangtze River, China. *Geology* **49**, 35–39 (2020).

354  
355 (6) About the MDA, the reason that you got so few youngest zircons is inadequate zircon tests.  
356 Most samples for the U-Pb analysis in the study is n=100/150. The ‘large-n’ datasets (e.g., > >  
357 300 analyses per sample; Pullen et al., 2014; Daniels et al., 2018; Sundell et al., 2019a, 2019b)  
358 in order to increase the probability of analyzing young grains should be used.

359 **Reply:** As we mentioned in our Response letter from the first round of reviews, younger (i.e.  
360 late Cretaceous–early Paleogene) zircons are completely lacking in our samples from the  
361 Sichuan, Xichang, and Huili Basins. Thus, the maximum depositional age (MDA) is  
362 insufficient to constrain depositional ages with certainty for these basins. Although the  
363 youngest single-grain ages in samples from the Chuxiong Basin are too few to be a robust  
364 indicator of the true depositional age, they are consistent with the late Cretaceous–early  
365 Cenozoic biostratigraphic age of these deposits. Detrital zircon “large-n” (n ≈ 1000) results  
366 from samples are generally used to assess dissimilarities amongst their age spectra during  
367 provenance analysis (Ibañez-Mejia et al., 2018), but samples from our study consistently  
368 show similarities (five age peaks, see Figs. 3 and S4). Moreover, we note that only one young  
369 zircon grain was observed from individual samples in the Chuxiong Basin. Thus, even if  
370 “large-n” is applied, the MDA calculated from several young zircons cannot reflect the exact  
371 age of each sampled horizon because of the unknown lag time between erosion and  
372 sedimentation (especially given that Cretaceous zircons likely experienced long-distance  
373 transport from the Lhasa terrane). Given this, we contend that the number of samples in our  
374 study area, in fact, sufficient to support the conclusions

375 **References:**

376 Ibañez-Mejia, M., Alex Pullen., Martin Pepper., Franco Urbani., Gourab Ghoshal., Juan C. Use and  
377 abuse of detrital zircon U-Pb geochronology—A case from the Río Orinoco delta, eastern Venezuela.  
378 *Geology* **46** (11), 1019–1022 (2018).

379  
380 (7) The author’s reply is actually not convinced me. We all know that the meandering river  
381 system typically consists of lag and sand bar deposits in the bottom and flood plain deposits  
382 showing an upward fining sequence. However, from your supplementary field photo Figure  
383 R6a and stratigraphic column Supplementary Figure 1, I cannot tell these features in the  
384 Xichang Basin. Moreover, I don’t think a meandering environment that consist of a thickness  
385 of about 4,000 m of sandstone and claystones (Supplementary Figure 1) in the Xichang Basin.  
386 The authors acknowledged that all stratigraphic and sedimentary work are from previous  
387 publication (in supplementary note). For the section in the Xichang Basin, the stratigraphic  
388 column (Supplementary Figure 1) is totally copied from Deng et al. (2018). Deng et al. (2018)  
389 state that “the basal member of the Xiaoba formation having 1400 m in thick changes from a  
390 fluvial environment at the base to a shallow-lacustrine facies at the top”. “The second member  
391 of the Xiaoba Formation is composed of ~100 m of lacustrine red sandstone, calcareous  
392 siltstone, calcareous mudstone, and limestone (mainly at the top of the section), interbedded  
393 with gray purple siltstone and calcareous lenses”. The third member is over 700 m thick and  
394 is primarily composed of calcareous siltstone and calcareous mudstone, interbedded with  
395 gray-purple quartz siltstone and gypsum layers, and represents a fluvial and

396 shallow-lacustrine facies. The Paleogene Leidashu Formation is over 1300 m thick changes  
397 from a fluvial environment at the base to a shallow-lacustrine facies at the top. Therefore, the  
398 authors did not do sedimentary work, but they denied the lacustrine interpretation of Deng et  
399 al. (2018) even if they copied Deng's section.

400 **Reply:** As acknowledged by the reviewer #1, fluvial environments do exist in the late  
401 Cretaceous Xiaoba Formation and the early Paleogene Leidashu Formation, even if lacustrine  
402 facies is also common. Meanwhile, we aim to emphasize the occurrence of fluvial  
403 environment in these deposits, thus lacustrine/lake interpretation was clearly not expressed in  
404 the earlier Supplementary Note. This has been clarified in the revised manuscript, and please  
405 noted that we have never denied the lacustrine interpretation of Deng et al. (2018), the  
406 existence of (exorheic) lake environment was mentioned in Supplementary Figure 1 and main  
407 text of the earlier manuscript.

408 More importantly, the sedimentary facies results in Deng et al., (2018) were also taken  
409 from previous province-scale or regional-scale geology reports, and they only provided a  
410 typical section (i.e., Mishi section) in the Xichang Basin. In the submitted Supplementary  
411 Note, we collected more sedimentological descriptions and depositional environment  
412 interpretations from more detailed geological mapping surveys of scale 1:50000 (Sichuan  
413 Bureau of Geology and Mineral Resources, 1990), and more recent geological mapping  
414 surveys of scale 1:250000 (Sichuan Geological Survey Institute, 2013). This literature clearly  
415 indicates that the late Cretaceous Xiaoba Formation and early Paleogene Leidashu Formation  
416 are dominated by alternating fluvial and lacustrine environments, based on detailed  
417 stratigraphic and sedimentological analysis (see revised Supplementary Note for details).  
418 Typical fluvial-lacustrine sequences of the Xiaoba Formation and Leidashu Formation in the  
419 Xichang Basin were presented in geological mapping survey report of scale 1:250000 (see  
420 Figures 1-56 and 1-57 in the Sichuan Geological Survey Institute, 2013). Overall, the  
421 fluvial-lacustrine facies association in the basin interpreted from the literature most likely  
422 records a hydrologically open lake or exorheic lake according to Carroll and Bohacs, (1999)  
423 and Bohacs et al., (2000).

424 The identification of ancient large-scale drainage systems should be fully related to the  
425 understanding of the depositional environments associated with modern large rivers.  
426 According to a review for the world's continental-scale rivers by Ashworth et al. (2012), the  
427 different combinations of sedimentation types lead to floodplain morphologies for big rivers  
428 that can be classified into four main types, and Type 1 is a lacustrine-dominated river system  
429 (as shown Figure 8A in Ashworth et al., 2012). The present-day largest anastomosing or  
430 meandering rivers in the world often develop lakes between trunk streams and their major  
431 tributaries (Maill et al., 1996; Ashworth et al., 2012). In other words, lake environments are a  
432 common component of large river systems (Ashworth et al., 2012), especially in extensive  
433 and low-gradient catchment areas, as in the Dongting Lake of the middle Yangtze (Chen et al.,  
434 2007).

435

#### 436 **References:**

- 437 Ashworth, P. J. & Lewin, J. How do big rivers come to be different? *Earth Sci Rev.* **114**, 84–107  
438 (2012).  
439 Bohacs, K. M., A. R. Carroll, J. E. Neal, P. J. Mankiewicz. Lake-basin type, source potential, and  
440 hydrocarbon character: an integrated-sequence-stratigraphic–geochemical framework, in E. H.  
441 Gierlowski-Kordesch and K. R. Kelts, eds., *Lake basins through space and time: AAPG Studies in*

442 Geology 46, p. 3–34 (2000).  
443 Carroll, A. R., Bohacs, K.M. Stratigraphic classification of ancient lakes: balancing tectonic and climatic  
444 controls. *Geology* 27, 99–102 (1999).  
445 Chen, Z., Xu, K., Watanabe, M. Dynamic hydrology and geomorphology of the Yangtze River. In:  
446 Gupta, A. (Ed.), *Large Rivers: Geomorphology and Management*. Wiley, Chichester, pp. 457–469,  
447 (2007).  
448 Miall, A. D. The Geology of Fluvial Deposits: Sedimentary Facies, Basin Analysis, and Petroleum  
449 Geology, 362–365, *Springer* (1996).  
450 Sichuan Geological Survey Institute. The Report of Regional Geological Survey of Xichang at Scale 1:  
451 250000 (China Industry Press, 2013).  
452 Sichuan Bureau of Geology and Mineral Resources. Geological Map of the Xichang, Hexi, Xincun,  
453 and Guolianggai Sheet (scale 1:50000) (Geological Publishing House Press, 1990).  
454

455 (8) For the Chuxiong Basin, I stated that “thick evaporite are occurred in the Jiangdihe  
456 Formation “. Yes, thin layers or nodules or crystals of evaporite can be formed in the arid  
457 fluvial environment. Of course, we cannot see thick evaporites in the field in the Chuxiong  
458 Basin, even in the Simao Basin and Khorat Basin since that the evaporite is easily dissolved  
459 under the tropical monsoon climate in these basins. Previous publication showed that several  
460 medium-scale salt mine of the Jiangdihe Formation were found (ref. 77). I am very curious  
461 about what the authors stated in the Supplementary Note line 211-2113 “Thus, the presence of  
462 thin evaporites is in contradiction with the existence of a low-gradient and continental-scale  
463 river system”. So, what is exactly the authors’ opinion?

464 Similarly, the authors copy the stratigraphic column of Deng’s section in the Chuxiong Basin.  
465 However, they wrongly place the basal conglomerates of the Matoushan Formation in Deng’s  
466 paper as the Jiangdihe Formation in Supplementary Figure 1. Deng et al. (2018) stated that  
467 “The Jiangdihe Formation represents a fluvial and shallow-lacustrine facies and the  
468 Zhaojiadian Formation fines upwards and represents a shallow-to-marginal lacustrine facies”.  
469 However, the authors proposed fluvial+lake and floodplain+fluvial environment for the  
470 Jiangdihe and Zhaojiadian formation, respectively, without any sedimentary work.

471 **Reply:** From the published literature (ref.<sup>77</sup> (i.e., Yunnan Bureau of Geology and Mineral  
472 Resources, 1965)) it may indeed appear that several sets of salt-bearing sequences occur in the  
473 Jiangdihe Formation. However, these sporadic salt-bearing sequences are still dominated by  
474 terrigenous clastic materials (e.g., 50% – 70% of siltstone and glutenite; ref.<sup>77</sup>), implying the  
475 lacustrine-dominated depositional systems were not persistently stable. In addition, deposition  
476 of the salt-rich calcareous mudstone facies only developed in the middle-upper part of the  
477 Jiangdihe Formation in local areas, which may have resulted from local lowlands (e.g., mire,  
478 pond, and oxbow lakes), or short-term climatic fluctuations. Please note that the current  
479 drainage basins of the world’s largest rivers also contain some small lakes (e.g., Amazon,  
480 Congo, Orinoco, and Mississippi), providing modern examples consistent with our idea.

481 More significantly, all Late Cretaceous–early Palaeogene stratigraphic sections in the  
482 Chuxiong Basin did not record prolonged lacustrine deposition. From a sedimentological  
483 perspective at the basin-scale, all literature consistently suggests that fluvial and shallow  
484 lacustrine depositional environments were predominant during deposition of the Upper  
485 Cretaceous Matoushan and Jiangdihe Formations (Yunnan Bureau of Geology and Mineral  
486 Resources, 1965, 1966, 1996; Xue et al., 2019). For example, a thick wedge-shaped sandstone  
487 body, known as “Fangjiahe wedge-sandstone body”, was found in the lower part of the  
488 Jiangdihe Formation (Yunnan Bureau of Geology and Mineral Resources, 1996). This

489 sandstone body is characterized by gray purple and dark purple thick lithic quartz sandstone  
490 interbedded with purplish red siltstone and mudstone, which are laterally continuous over  
491 scales of hundreds of meters, and longitudinally spread about 4.3 km. Single bed thickness is  
492 commonly >2 m, and sandstones show large-scale cross stratification, consistent with  
493 deposition by a large-scale fluvial system. For the early Paleogene Zhaojiadian Formation,  
494 Deng et al., (2018) interpreted this unit in the Yijiu section as dominated by a  
495 shallow-to-marginal lacustrine system, but approximately synchronous lateral facies changes  
496 may exist across the basin. The Zhaojiadian Formation in the Guatang-Sanzhi section (near  
497 the Yijiu section) clearly contains fluvial deposits (Yunnan Bureau of Geology and Mineral  
498 Resources, 1965), which shows typical fluvial sedimentary features including: (i) purplish  
499 thickly bedded red sandstone interbedded with siltstone and mudstone beds; (ii) individual  
500 sandstone beds with basal granule lags and multi-scale cross stratifications, which probably  
501 resulted from bar migration and channel migration and filling processes; (iii) Mud cracks,  
502 calcareous nodules, and bioturbation structures are common in finer-grained deposits, likely  
503 representing floodplain or overbank depositional environments.

504 Biofacies records in the Chuxiong Basin provide further evidence. Here the fossil record  
505 is dominated by ostracodes, freshwater lamellibranchia, fish species, and plant fossils which  
506 are typical of the paleontological assemblages of many other hydrologically open lakes  
507 (Carroll and Bohacs, 1999; see Figure 1 in Bohacs et al., 2000). Taken together, these findings  
508 strongly suggest that the Chuxiong Basin was not a protracted endorheic basin, but instead a  
509 hydrologically open basin over the time span of accumulation of depositional sequences  
510 during the late Cretaceous–early Paleogene. Such overfilled lake setting has been believed to  
511 be very closely related to perennial river systems (Carroll and Bohacs, 1999; Bohacs et al.,  
512 2000). We have added these significant supplements to the revised manuscript and  
513 Supplementary Note. Finally, errors in placement of the boundary between the Matoushan and  
514 Jiangdihe Formations in Supplementary Figure 1, and inappropriate sedimentary environment  
515 assemblages of Deng et al., (2018) have been corrected.

516

#### 517 **References:**

518 Bohacs, K. M., A. R. Carroll, J. E. Neal, P. J. Mankiewicz. Lake-basin type, source potential, and  
519 hydrocarbon character: an integrated-sequence-stratigraphic–geochemical framework, in E. H.  
520 Gierlowski-Kordesch and K. R. Kelts, eds., Lake basins through space and time: AAPG Studies in  
521 Geology 46, p. 3–34 (2000).

522 Carroll, A. R., Bohacs, K.M. Stratigraphic classification of ancient lakes: balancing tectonic and climatic  
523 controls. *Geology* 27, 99–102 (1999).

524 Xue C, D., Xiang K., Hu, T. Y., et al. Sedimentary Environments of Late Cretaceous Ore-bearing  
525 Sequences at the Guihua Copper Ore Field in the Northern Chuxiong Basin, Yunnan Province, SW  
526 China. *Acta Sedimentologica Sinica*, 37, 491-501 (2019). doi: 10.14027/j.issn.1000-0550.2018.153

527 Yunnan Bureau of Geology and Mineral Resources. Geological Map of the Chuxiong Sheet (scale  
528 1:200000) (Geological Publishing House Press, 1966).

529 Yunnan Bureau of Geology and Mineral Resources. Geological Map of the Chuxiong Sheet (scale  
530 1:50000) (Geological Publishing House Press, 1996).

531 Yunnan Bureau of Geology and Mineral Resources. Geological Map of the Dayao Sheet (scale  
532 1:200000) (Geological Publishing House Press, 1965).

533

534

535

536

537 (9) Therefore, I easily found that the authors just simply copied two sections in the Xichang  
538 and Chuxiong basins of Deng et al. (2018). Based on my personal opinion and authors' cited  
539 publication (ref 16, Deng et al., 2018), I do prefer a fluvial and lacustrine environment during  
540 that time. It also indicates that the sedimentary environment fluctuate between fluvial and  
541 lacustrine and is not stable in such a long time range as the authors' claimed.

542 **Reply:** We agree the reviewer that fluvial and lacustrine sedimentary environments were  
543 dominant in the studied basins during the late Cretaceous–early Palaeogene. As mentioned in  
544 points 6 and 7 above, such fluvial-lacustrine facies associations together with characteristic  
545 freshwater fossil assemblages demonstrates that these late Cretaceous–early Palaeogene  
546 basins are best interpreted as typical overfilled lake basins or hydrologically open lakes based  
547 on Carroll and Bohacs (1999) and Bohacs et al. (2000). This suggests the influx rate of water  
548 + sediment fill generally exceeds potential accommodation for these studied basins, which  
549 would allow a development of through-going river systems (Carroll and Bohacs, 1999).

550 Although the two typical stratigraphic columns of the Xichang and Chuxiong basins in  
551 Fig. S1 were cited from Deng et al., (2018), we have included more detailed sedimentological  
552 information from a basin-scale perspective in the revised manuscript (lines 138–150) and  
553 Supplementary Note. All evidence and/or observations do not support the interpretation of  
554 endorheic lakes for late Cretaceous–early Palaeogene basins envisaged by the reviewer (See  
555 revised Supplementary Note for more details).

556 We have emphasized a prolonged period of regional tectonic stability, rather than the  
557 stability of sedimentary environments. Temporal and spatial shifts of sedimentary  
558 environments between fluvial and lacustrine are very common in large-scale drainage systems  
559 (e.g., the Yinchuan rift basin through which the Yellow River flows; see Figure 5 in Ma et al.,  
560 2021), possibly due to channel migration, climate fluctuations, differential  
561 subsidence/compaction and local tectonic perturbation. Especially in a large-scale drainage  
562 system that includes several overflow lakes as interpreted in this study, shifts between fluvial  
563 and lacustrine conditions would be frequent.

564  
565 **References:**

566 Ma, X. D., Yin, G. M., Wei, C. Y., et al. High-resolution late Pliocene-Quaternary magnetostratigraphy  
567 of the Yinchuan Basin, NE Tibetan Plateau. *Quaternary International*, **607**, 120-127 (2021)

568  
569 (10) As for the Simao and Khorat basins, no matter the evaporite is marine or non-marine, it is  
570 impossible to form such a salt giant in an open environment (Please see Warren, 2016,  
571 *Evaporites-A Geological Compendium*). The authors claimed in the response letter line 417 to  
572 422 that marine incursion evaporites cannot be used as an argument against a fluvial system  
573 that drained into the Neo-Tethyan Ocean. I guess the authors argued the seawater may be  
574 intruded from the Neo-Tethyan Ocean (from south to north) and thus claimed like that.  
575 However, marine incursions were not from the Neo-Tethyan Ocean, but rather from the  
576 Meso-Tethys Ocean or proto-Paratethys Sea as the cited publications (in Response letter  
577 line 14 to 15) argued. Therefore, the authors used the marine incursion evaporite to support the  
578 existence of fluvial system is unreasonable and untenable. Moreover, the lithological and  
579 sedimentary features is indicative of a typical saline lake by many publications (Hite and  
580 Japakasetr, 1979; El Tabakh et al., 1999; Zhang et al., 2013; Liu et al., 2018; Qin et al., 2020;  
581 Wang et al., 2021). As such, the Xichang, Chuxiong, Simao, and Khorat Basins during the so

582 called late Cretaceous to Early Paleogene are mostly lacustrine. And Simao and Khorat saline  
583 lakes were not exorheic.

584 **Reply:** We have explained these issues in our response to the reviewer's major points (1) and  
585 (2) above. Here we need to add that we have never considered the use of the marine incursion  
586 evaporite to directly support the existence of a large-scale fluvial system that presented this  
587 study. Instead, Late Cretaceous–early Palaeogene sea transgression in the Simao–Khorat  
588 Basins strongly suggests these areas were very close to the ocean and at a relatively low  
589 elevation (near sea level) at that time, which allows the more reasonable interpretation –  
590 advocated in our paper – that the proposed continental-scale river system discharged  
591 southward into the Neo-Tethyan Ocean (see Fig. 4 for an illustration of our inferred  
592 paleogeographic position).

593

594 (11) Provenance analysis

595 I suggest you put the newly added data of Simao and Khorat in the MDS plot in  
596 Supplementary Figure 6. And it is obvious that the Indochina plot so far away from your  
597 samples, indicating there was no provenance connection between them. So why do the  
598 authors' believe the fluvial system can flow to the Indochina?

599 **Reply:** Thanks, we had put the newly added data of the Simao basin in the MDS plot in the  
600 last submitted version. The Simao Basin and Muang Xai Basin are located on the Indochina  
601 terrane. Detrital zircon data from late Cretaceous–early Paleogene samples of the two basins  
602 show strikingly consistent peaks at 200–300 Ma, 390–480 Ma, 700–900 Ma, 1700–2000 Ma,  
603 and 2300–2600 Ma (Wang et al., 2014; Wang et al., 2017; Chen et al., 2017; Yan et al., 2021;  
604 Fig. S8), which has been interpreted to be sourced mainly from the Songpan-Ganzi, Yidun,  
605 and Qiangtang terranes, rather than proximal source area (i.e., Indosinian terrane) (Wang et al.,  
606 2014; Wang et al., 2017; Chen et al., 2017; Yan et al., 2021). In other words, if the Simao and  
607 Muang Xai Basins were endorheic basins during the late Cretaceous–early Paleogene,  
608 sediments in the two basins must be derived from surrounding older rocks in the Indosinian  
609 terrane, and we would expect the widespread Triassic metamorphic rocks surrounding these  
610 basins to provide a major source of detrital material and a unique prominent peak at 200–  
611 250 Ma. But this is not the case. This is why we have believed there was a large-scale  
612 paleohydraulic system connected the current Tibetan Plateau and the Simao-Muang Xai  
613 basins during the late Cretaceous–early Paleogene, as discussed in the main text (lines 224–  
614 227).

615 The dominance of upper reaches/headwaters-derived provenance is also commonly  
616 observed in the middle and lower reaches of most today's large river systems. For example,  
617 southeastern Tibet (the upper reaches of the Yangtze River) has been determined to be the  
618 dominant sediment contributor for stored sediments in the middle-lower reaches of the  
619 Yangtze River (Zhang et al., 2020); Similarly, the drainage area of the upper Yellow River  
620 (i.e., northeastern Tibetan Plateau) has been interpreted as a major sediment source for the  
621 Yinchuan Basin (approximately 1500 km northeast of the headwater area) (Wang et al., 2019).

622 **References:**

623 Wang, Z., Nie, J., Wang, J., Zhang, H., Peng, W., Garzanti, E., et al. Testing contrasting models of the  
624 formation of the upper Yellow River using heavy-mineral data from the Yinchuan Basin drill  
625 cores. *Geophysical Research Letters*, **46**, 10338–10345. (2019).

626 Zhang, Z., Daly J. S., Li C., et al. Southeastern Tibetan Plateau serves as the dominant sand contributor  
627 to the Yangtze River: Evidence from Pb isotopic compositions of detrital K-feldspar. *Terra Nova*,

628 [33, 195–207 \(2020\).](#)

629

630 (12) Landscape and large river system.

631 Such a long and large river system existed in the eastern Tibetan Plateau maybe need a higher  
632 elevation and large erosion, and thus will results in enough clastic materials to transport into  
633 the Neo-Tethys Ocean. Together with the authors' claimed that there were no proximal  
634 sources, I have three concerns. (1) How can a low-relief landscape with slow exhumation and  
635 erosion (slow cooling) can supply so many clastic materials to the Neo-Tethys Ocean in such  
636 a long distance (at least 3000 km)?

637 **Reply:** We do not argue that a higher elevation is a prerequisite for the establishment of large  
638 river systems, because a stable long-wavelength topographic slope is sufficient to sustain the  
639 longevity of a continental-scale drainage system. The combination of depositional  
640 environments, thermochronological results, landscape modeling, available palaeo-altimetric  
641 data, and tectonic setting discussed in this study shows that the proposed large river was  
642 low-gradient, low-energy, and long-lived, and also was accompanied by extensive floodplains,  
643 wetlands, and exorheic lakes that are similar to modern continental, lowland rivers. This  
644 implies this river system was likely dominated by lateral planation over most of the region,  
645 rather than vertical incision. Concurrently, a prolonged Late Cretaceous–early Palaeogene  
646 tectonic stability in eastern Tibet would not have provided sufficient relief to generate  
647 significant amounts of denudation. Last but not least, sediment budget and provenance studies  
648 widely demonstrate that the majority of the eroded sediments of large rivers are stored in  
649 terrestrial basins (Potter, 1978; Nie et al., 2015) which resemble the Sichuan, Xichang, Huili,  
650 Chuiong, Simao basins in our fluvial model. In this case, those pre-existing upland reliefs  
651 were progressively smoothed away from the main riverine network as individual negative  
652 relief elements were filled with fine-materials over tens of millions of years. Thus, the detrital  
653 materials flowing into the Neo-Tethys Ocean may be only a small fraction of the total  
654 sediment load; however, more thorough examination of Late Cretaceous–early Palaeogene in  
655 the Khorat Basin and the area to the south, especially adjacent sea area, will be required to  
656 fully ascertain sediment budget delivered by the proposed transcontinental river during that  
657 time period, using offshore drilling and seismic investigations.

658 With respect to the ~3000 km long axis of the river envisaged by reviewer #1, this  
659 appears to be overestimated. Because both the Simao and Khorat Basins were located at  
660 paleolatitudes of ~20°–30° N during the late Cretaceous to early Paleocene based on available  
661 palaeomagnetic results (e.g., Charusiri et al., 2006; Singsoupho et al., 2014; Zhang et al.,  
662 2018; Yan et al., 2021), which means the paleo-position of the Khorat Plateau during the late  
663 Cretaceous was located to the northwest of the present position, at least ~750 km apart  
664 (Singsoupho et al., 2014).

665 **References:**

666 Charusiri, P., Imsamut, S., Zhuang, Z., Ampaiwan, T., Xu, X. Paleomagnetism of the earliest  
667 Cretaceous to early late Cretaceous sandstones, Khorat Group, Northeast Thailand: Implications for  
668 tectonic plate movement of the Indochina block. *Gondwana Res.* **9**, 310–325 (2006).  
669 Nie, J. S., Stevens, T., Rittner, M., Stockli, D., Garzanti, E., Limonta, M., et al. Loess Plateau storage  
670 of northeastern Tibetan Plateau-derived Yellow River sediment. *Nature Communications*, **6**, 8511  
671 (2015).  
672 Singsoupho S, Bhongsuwan T, Elming S Å. Tectonic evaluation of the Indochina Block during  
673 Jurassic-Cretaceous from palaeomagnetic results of Mesozoic redbeds in central and southern Lao  
674 PDR. *Journal of Asian Earth Sciences*, 2014, **92**, 18–35 (2014).



675 Potter, P. E. Significance and origin of big rivers. *J. Geol.* 13–33 (1978).  
676 Yan, M. D., Zhang, D. W., Fang, X. M., Zhang, W. L., Song, C. H et al. New Insights on the age of the  
677 Mengyejing formation in the Simao basin, SE Tethyan domain and its geological implications. *Sci*  
678 *China Earth Sci.* **64**, 231–252 (2021).  
679 Zhang D., Yan M., Fang X., Yang Y., Zhang T., Zan J., Zhang W., Liu, C & Yang Q.  
680 Magnetostratigraphic study of the potash-bearing strata from drilling core ZK2893 in the Sakhon  
681 Nakhon Basin, eastern Khorat Plateau. *Palaeogeogr Palaeoclimatol Palaeoecol.* **489**, 40–51  
682 (2018).

683  
684 (13) If the river do flow into the Neo-Tethys Ocean, do the authors have any evidence of  
685 sedimentary sequence in delta and offshore Thailand?

686 **Reply:** On the basis of frequent marine incursions and a paleo-elevation of near sea level in  
687 the Simao–Khorat areas, detrital zircon provenance results from the Muang Xai and Khorat  
688 Basins, a dominant south-directed paleocurrent from the Khorat Basin, and reconstructed  
689 paleo-continental configuration of East Asia (see revised manuscript for details), we interpret  
690 that the Late Cretaceous–early Palaeogene large river system discharged into the Neo-Tethys  
691 Ocean. However, it is very difficult to reconstruct basin paleogeography, and to exactly  
692 determine where this river discharged into the Neo-Tethys Ocean at that time, due to  
693 significant paleo-position change resulting from extrusion of Indochina, complex block  
694 rotation, and intense uplift-erosion since that time. For example, 1000–1250 m of Late  
695 Cretaceous deposits once covered the whole of the Khorat Plateau area, and has subsequently  
696 been eroded (Booth and Sattayarak, 2011), which explains why remnants of the Late  
697 Cretaceous–early Palaeogene Maha Sarakham Formation are mainly exposed in low-lying  
698 areas, particularly in the central part of the Khorat Plateau (Meesook, 2000). Moreover, a  
699 latitudinal movement of the Indochina Block of about 5–11° (translation of about 750–1700  
700 km in the southeastward direction along the Red River Fault) and clockwise rotation of 13–18°  
701 with respect to the South China Block have occurred since the Mesozoic (Charusiri et al.,  
702 2006; Singsoupho et al., 2014).

703 Nonetheless, we still try to explore this issue from a broader context. In the Borneo area  
704 south of the Indochina terrane, there are very thick, late Cretaceous to early Cenozoic deep  
705 water sub-marine fan deposits, known as the Rajang Group and Kayan Group. Field  
706 observations and sedimentological analyses indicate such very thick deep-water sequence  
707 must have been deposited in one of the world's largest ancient submarine fans and transported  
708 by a large river system (Galín et al., 2017). Galín et al. (2017) identified the late Cretaceous–  
709 early Paleogene Rajang Group as deposits of a sub-marine fan similar in size to some modern  
710 river fans like the Amazonas or the Mississippi, remarkably mismatching present-day smaller  
711 river systems in Borneo. Detrital zircon results from late Cretaceous–early Paleogene samples  
712 have shown that these deposits were likely from SW Borneo, Sibumasu, and Indochina based  
713 on a dominance of Mesozoic zircon ages that derived proximally from widespread Mesozoic  
714 magmatic arcs (Galín et al., 2017; Breitfeld and Hall, 2018). However, some distal  
715 provenance signals were diluted or even overridden by a robust proximal source given that the  
716 zircon yield of magmatic rocks is significantly higher than that of sedimentary rocks. We note  
717 that late Cretaceous–early Paleogene samples from the giant marine fan distinctly show three  
718 Precambrian peaks at 2400–2600 Ma, 2000–1600 Ma, and 1100–800 Ma (Fig. S8; also see  
719 Figure 11 in Galín et al., 2017, and Figure 12 in Breitfeld and Hall, 2018), suggesting the  
720 Songpan-Ganzi and Upper Yangtze terranes as possible source areas. Moreover, Paleozoic and

721 Precambrian zircons are usually subrounded to rounded and also indicate recycling from older  
722 sediments as important source (Galín et al., 2017). Thus, the Borneo fan could be a potential  
723 sink of the large river presented this study, but a further investigation of late Cretaceous–early  
724 Paleogene strata from the Khorat to Borneo area is needed to test this hypothesis (revised  
725 manuscript, lines 252–256; Fig. S8).

726 In any case, it is clear from the above review that the Simao–Khorat area was very close  
727 to the ocean at that time, and even a marginal marine or sea/land facies has been identified  
728 within the Late Cretaceous strata (Wang et al., 2021). Therefore, a more reasonable  
729 interpretation is that the proposed continental-scale river system discharged into the  
730 Neo-Tethyan Ocean.

731

### 732 **References:**

- 733 Breitfeld, H. T., and Hall, R. The eastern Sundaland margin in the latest Cretaceous to Late Eocene:  
734 Sediment provenance and depositional setting of the Kuching and Sibuluan Zones of Borneo.  
735 *Gondwana Research* **56**, 34–64 (2018).
- 736 Booth, J. E., Sattayarak, N., 2011. Subsurface Carboniferous–Cretaceous geology of Northeast  
737 Thailand. In: Ridd, M.F., Barber, A.J., Crow, M.J. (Eds.), *The Geology of Thailand*. *Geological*  
738 *Society London*, pp. 184–222.
- 739 Charusiri, P., Imsamut, S., Zhuang, Z., Ampaiwan, T., Xu, X. Paleomagnetism of the earliest  
740 Cretaceous to early late Cretaceous sandstones, Khorat Group, Northeast Thailand: Implications for  
741 tectonic plate movement of the Indochina block. *Gondwana Research* **9**, 310–325 (2006).
- 742 Galín, T., Breitfeld, H. T., Hall, R., Sevastjanova, I. Provenance of the Cretaceous–Eocene  
743 Rajang Group submarine fan, Sarawak, Malaysia from light and heavy mineral assemblages and U–Pb  
744 zircon geochronology. *Gondwana Research* **51**, 209–233 (2017).
- 745 Singsoopho S, Bhongsuwan T, Elming S Å. Tectonic evaluation of the Indochina Block during  
746 Jurassic–Cretaceous from palaeomagnetic results of Mesozoic redbeds in central and southern Lao  
747 PDR. *Journal of Asian Earth Sciences*, 2014, **92**, 18–35 (2014).
- 748 Wang, L. C., Zhong, Y. S., Xi, D. P., Hu, J. F. & Ding, L. The Middle to Late Cretaceous marine  
749 incursion of the Proto-Paratethys sea and Asian aridification: A case study from the Simao–Khorat  
750 salt giant, southeast Asia. *Palaeogeogr Palaeoclimatol Palaeoecol.* **567**, 110300 (2021)

751

752 (14) Sections and samples Authors provide the GPS of all samples, however I found sample  
753 distance in the Dujiangyan section is nearly up to 30 km from Google Earth. That is  
754 absolutely not the sampling action in the same section because the Dujiangyan section only  
755 have ca. 800 m in thickness. The same as the Leshan section, two sample distance is up to 21  
756 km. So it is absolutely questionable of the sampling.

757 The authors acknowledged that all stratigraphic and sedimentary work in the Xichang and  
758 Chuxiong basins are from previous publication. And as I mentioned above, the stratigraphic  
759 columns in these two basins are totally copied from Deng et al. (2018). So I doubt that the  
760 authors' sampling is consistent with the section description. Therefore, from the authors'  
761 sampling and stratigraphic work, I have to trace back to the age of the section again. All age  
762 constraints from this study is the fossils which is done about 40 years ago. Previous fossil  
763 results were from regional mapping at scale of 1:200,000 or type section. The studied sections  
764 are obviously not the type section, so previous results should not be applied directly. How can  
765 the regional fossils be used in whole basin?

766 **Reply:** This has been clarified in the revised text. Unfavorable outcrop conditions of late  
767 Cretaceous–early Palaeogene deposits exposed in the studied basins preclude the possibility

768 of dating every sample horizon. Field investigations have revealed that Upper Cretaceous to  
769 lower Palaeocene outcrops in the southwestern Sichuan Basin were either partially covered by  
770 vegetation or slightly deformed. The observed outcrops are restricted to road cuts, coast and  
771 valleys. Thus, sampling locations in the Dujiangyan and Leshan areas were not from a single  
772 cross section, but an integrated stratigraphic section of a gently folded anticline or syncline.  
773 Stratigraphic horizons of samples were based on mapped geological cross-section, lithofacies  
774 associations, depositional systems, strata thickness, and deformation patterns that described  
775 from detailed 1: 200000 and 1: 50000 regional-scale geological maps. In order to avoid  
776 misunderstanding, we used the Dujiangyan *area* and Leshan *area* instead of the Dujiangyan  
777 *section* and Leshan *section* in the revised manuscript.

778 The section sampled in the Xichang basin in this study is the Mishi Section of Deng et al.  
779 (2018), thus the sampling horizons in Fig. S1 are correct. In fact, late Cretaceous–early  
780 Palaeogene stratigraphic successions in the Xichang basin have only been exposed in a single  
781 syncline including the type section, which is conducive to spatiotemporal correlation of  
782 limited sedimentary sequences of late Cretaceous–early Palaeogene. The extent of late  
783 Cretaceous–early Palaeogene strata in the Chuxiong Basin is larger than that in Xichang Basin,  
784 but it is also exposed in two adjacent synclines based on regional mapping at scale of  
785 1:200000 and geological cross-sections. Moreover, multiple late Cretaceous–early Palaeogene  
786 stratigraphic sections including the Yijiu section from Deng et al. (2018) in the Chuxiong  
787 Basin show very similar stratigraphic cycles, lithofacies and facies associations, and marked  
788 beds, despite slightly varying lateral facies. Combined with well-mapped geological  
789 cross-sections, this allows the sampling horizons in different sites to be easily set on  
790 corresponding positions of typical sections. We admit that the sampling horizons of this study  
791 may not be very exact due to unavoidable uncertainties, but adequate sedimentation interval  
792 between samples from one basin suggests the provenance signal has been stable over tens of  
793 millions of years. Just as the comment from Reviewer #4, *“the suite of consistent detrital*  
794 *zircon ages from depositional basins spanning 600-750 km from north to south provides*  
795 *critical support to their hypothesized drainage basin geometry and the proposed timing of its*  
796 *existence as an integrated depositional system. To me, this spatial-temporal consistency is a*  
797 *key factor supporting the interpretation offered by these authors.”*

798 About depositional age constrained by palaeontological results, abundant ostracods and  
799 charophyta presented this study were obtained from the whole basin, rather than a type  
800 section. Characteristic ostracods and/or charophyta assemblage is also one of justifications of  
801 sequence correlation. Also, please note that palaeontological types, formation boundaries, and  
802 even sedimentary facies results in Deng et al., (2018) were mainly taken from previous  
803 province-scale or regional-scale geology reports. By comparison, we have added more  
804 detailed materials on the basis of research of Deng et al., (2018) from smaller-scale geology  
805 reports (e.g., Yunnan Bureau of Geology and Mineral Resources, 1996; Sichuan Bureau of  
806 Geology and Mineral Resources, 1990)

#### 807 **References:**

808 Sichuan Bureau of Geology and Mineral Resources. Geological Map of the Xichang, Hexi, Xincun,  
809 and Guolianggai Sheet (scale 1:50000) (Geological Publishing House Press, 1990).  
810 Yunnan Bureau of Geology and Mineral Resources. Geological Map of the Chuxiong Sheet (scale  
811 1:50000) (Geological Publishing House Press, 1996).

812

813 (15) Standard zircons

814 I commented the dating results of the Standard zircons, but I cannot see correct or appropriate  
815 response. Yes, as the authors replied, the detrital zircon dating is a usual way. But for each test,  
816 your 91500 and GJ-1 zircons should generate their ages. What I asked is you should provide  
817 all the ages of 91500 and GJ-1 during your experiment, so that I can determine your deviation  
818 between the test values and recommended ages. And then I will have an idea about the  
819 reliability of all ages of the samples. So you cannot use the dating results in Yuan et al. (2004)  
820 to tell me that the ages in your study is reliable.

821 **Reply:** As requested by reviewer #1, we added a Table that contains dating results of the  
822 standard zircons (available from <https://figshare.com/s/a6f79d6f03b18aec1d44>). In our study,  
823 the external standard zircons of 91500, GJ-1 and Qinghu yielded  $^{206}\text{Pb}/^{238}\text{U}$  weighted ages of  
824 **1062.5 ± 1 Ma (n = 212), 604.6 ± 2 Ma (n = 137), and 159.9 ± 0.83 Ma (n = 34)**,  
825 respectively. These are consistent with reference ages of  $1063.1 ± 8.1$  Ma (91500, Yuan et al.,  
826 2004),  $599.8 ± 4.5$  Ma– $610 ± 1.7$  Ma (GJ-1, Jackson et al., 2004 and Eelhlou et al., 2006), and  
827  $159 ± 0.2$  Ma (Qinghu, Li et al. 2013). This indicates our detrital zircon data are credible  
828 (revised manuscript, lines 339–343).

#### 829 **References**

830 Eelhlou S, Belousova E, Griffin W L, et al. Trace element and isotopic composition of GJ red zircon  
831 standard by laser ablation. *Geochimica et Cosmochimica Acta*, 70 (18), A158 (2006).

832 Jackson, S.E., Pearson, N.J., Griffin, W.L., Belousova, E.A. The application of laser  
833 ablation-inductively coupled plasma-mass spectrometry to in situ U-Pb zircon geochronology.  
834 *Chemical Geology*, 211, 47–69 (2004). <https://doi.org/10.1016/j.chemgeo.2004.06.017>.

835 Li, X., Tang, G., Gong, B., Yang, Y.H., Hou, K., Hu, Z., Li, Q., Liu, Y., Li, W. Qinghu zircon: A  
836 working reference for microbeam analysis of U-Pb age and Hf and O isotopes. *Chinese Science*  
837 *Bulletin*, 58, 4647–465 4 (2013). <https://doi.org/10.1007/s11434-013-5932-x>.

838 Yuan, H. L., Gao, S., Liu, X. M., Li, H. M., Günther, D. & Wu, F. Y. Accurate U-Pb age and trace  
839 element determinations of zircon by laser ablation inductively coupled plasma mass spectrometry.  
840 *Geostand. Geoanal. Res.* 28, 335–370 (2004).

841

842

#### 843 **Reviewer #2**

844 I reviewed the revision submitted by Huiping Zhang and co-authors. All of my comments  
845 were sufficiently addressed. I support publication of this manuscript.

846 Andrew Laskowski

847 **Reply:** We sincerely appreciate Dr. Andrew Laskowski for accepting our corrections in  
848 previous manuscript.

849

850

#### 851 **Reviewer #3**

852 Dear Editor and Authors,

853 Thanks for the detailed response to my previous comments. After reading the manuscript, I  
854 thought there are still a few problems that need to be addressed before publication.

855 (1) First, the authors present a few pictures to prove a continental scale river through the  
856 basins in SE Tibet, but I suspect this. As shown in the pictures, the laminated and fine grained  
857 sandstones and mudstones are better to be interpreted in lacustrine environment, as

858 suggested by the Reviewer 1. If the sediments were transported by a large river, we should  
859 observe some cross beddings, which are scarce in these basins.

860 **Reply:** Thank you for this comment. Apart from lacustrine facies, late Cretaceous–early  
861 Paleogene strata from these studies basins also contain significant fluvial deposits, which  
862 show typical fluvial sedimentary features, including various-scale cross stratifications, upward  
863 fining sequences, basal granule lags, lenticular or tabular sandstone beds with erosional  
864 contacts, and crevasse splay deposits, as widely described by many studies (e.g., Yunnan  
865 Bureau of Geology and Mineral Resources, 1965, 1966, 1996; Sichuan Bureau of Geology  
866 and Mineral Resources, 1990; Sichuan Geological Survey Institute, 2013; Deng et al., 2018;  
867 see revised Supplementary Note for details; Fig. R1). It is noteworthy that the type of sheet  
868 and ribbon sandstone interbedded with the mudstone beds has commonly been formed by  
869 aggradation of fixed channels and simple fills (Miall, 1996), rather than lacustrine facies due  
870 to the prevalence of mud cracks, calcareous nodules, and bioturbation structures within  
871 siltstone and mudstone interlayers.

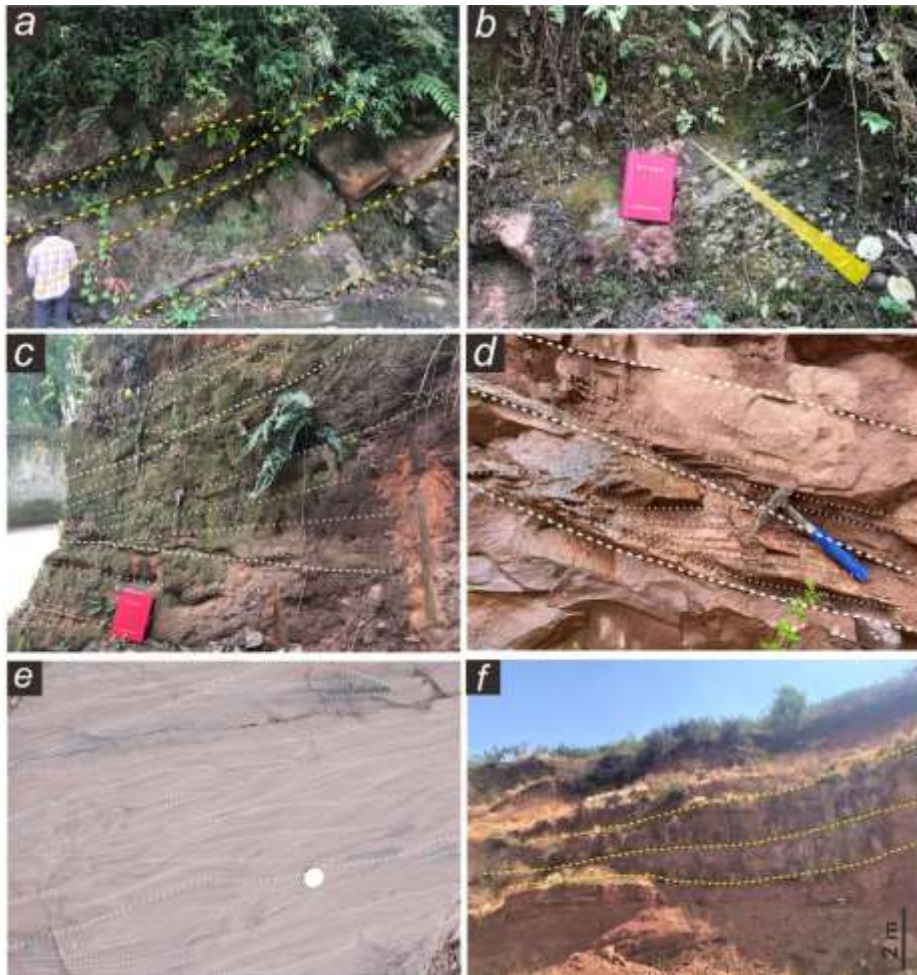

872  
873 Fig. R1 Representative sedimentary structures of fluvial architecture in studies late Cretaceous–early  
874 Palaeogene basins. (a) Lenticular sand body of channel in fluvial deposits (Dujiangyan area). (b)  
875 Clast-supported conglomerates and coarse-grained sandstone showing upward fining trend (Dujiangyan  
876 area). (c) Reddish sandstone with large-scale tabular-cross bedding (Leshan area). (d) Planar cross-bedded  
877 sand overlying suspected rippled cross-bedded sand (Xichang Basin). (e) Rippled cross-bedded and  
878 climbing cross-bedded sandstone (Xichang Basin). (f) Floodplain and crevasse splay deposits;  
879 fine-grained deposits are floodplain fines, lenticular sandstones are interpreted as crevasse splays (Huili  
880 Basin). All photographs taken by Xudong Zhao.

881 For authenticating the occurrence of fluvial environments, we collected detailed  
882 sedimentological descriptions and depositional environment interpretations from more  
883 detailed or more recent geological mapping surveys in the submitted Supplementary Note.  
884 Again, this literature clearly indicates that late Cretaceous–early Paleogene sediments from  
885 these basins were dominated by alternating fluvial and lacustrine environments (e.g., Sichuan  
886 Geological Survey Institute, 2013; Sichuan Bureau of Geology and Mineral Resources, 1990;  
887 Yunnan Bureau of Geology and Mineral Resources, 1965, 1966, 1996; Xue et al., 2019; see  
888 revised Supplementary Note for details). More importantly, based on the identifying criterion  
889 of lake types from Carroll and Bohacs (1999) and Bohacs et al. (2000), such fluvial-lacustrine  
890 facies association has been ascribed to be typical of the deposits of hydrologically open lakes  
891 or exorheic lakes associated with perennial river systems (see Figure 7 in Bohacs et al., 2000).

892 The biofacies records provide further evidence. In sequences exposed in these late  
893 Cretaceous–early Paleogene basins, ostracods, freshwater lamellibranchia, fish species, and  
894 plant fossils have been widely found — typical paleontological assemblages of many other  
895 hydrologically open lakes (Carroll and Bohacs, 1999; Bohacs et al., 2000; Figure 1 in Bohacs  
896 et al., 2000). These findings strongly suggest that these studied basins are best interpreted as  
897 hydrologically open basins/overflow basins associated with a large-scale river system during  
898 the late Cretaceous–early Paleogene (Carroll and Bohacs, 1999; Bohacs et al., 2000). We have  
899 added this clarification and additional documentation to the revised manuscript (lines 146–  
900 153) and revised Supplementary Note.

901

## 902 **References**

- 903 Bohacs, K. M., A. R. Carroll, J. E. Neal, P. J. Mankiewicz. Lake-basin type, source potential, and  
904 hydrocarbon character: an integrated-sequence-stratigraphic–geochemical framework, in E. H.  
905 Gierlowski-Kordesch and K. R. Kelts, eds., *Lake basins through space and time: AAPG Studies in  
906 Geology* 46, p. 3–34 (2000).
- 907 Carroll, A. R., Bohacs, K.M. Stratigraphic classification of ancient lakes: balancing tectonic and climatic  
908 controls. *Geology* **27**, 99–102 (1999).
- 909 Deng, B., Chew, D., Jiang, L., Mark, C., Cogne, N., Wang, Z. J. & Liu, S. G. Heavy mineral analysis  
910 and detrital U-Pb ages of the intracontinental Palaeo-Yangtze basin: Implications for a  
911 transcontinental source-to-sink system during Late Cretaceous time. *Geol. Soc. Am. Bull.* **130**,  
912 2087–2109 (2018).
- 913 Miall, A. D. *The Geology of Fluvial Deposits: Sedimentary Facies, Basin Analysis, and Petroleum  
914 Geology*, 362–365, *Springer* (1996).
- 915 Sichuan Geological Survey Institute. *The Report of Regional Geological Survey of Xichang at Scale 1:  
916 250000* (China Industry Press, 2013).
- 917 Sichuan Bureau of Geology and Mineral Resources. *Geological Map of the Xichang, Hexi, Xincun,  
918 and Guolianggai Sheet (scale 1:50000)* (Geological Publishing House Press, 1990).
- 919 Yunnan Bureau of Geology and Mineral Resources. *Geological Map of the Chuxiong Sheet (scale  
920 1:200000)* (Geological Publishing House Press, 1966).
- 921 Yunnan Bureau of Geology and Mineral Resources. *Geological Map of the Chuxiong Sheet (scale  
922 1:50000)* (Geological Publishing House Press, 1996).
- 923 Yunnan Bureau of Geology and Mineral Resources. *Geological Map of the Dayao Sheet (scale  
924 1:200000)* (Geological Publishing House Press, 1965).
- 925 Xue C, D., Xiang K., Hu, T. Y., et al. Sedimentary Environments of Late Cretaceous Ore-bearing  
926 Sequences at the Guihua Copper Ore Field in the Northern Chuxiong Basin, Yunnan Province, SW  
927 China. *Acta Sedimentologica Sinica*, **37**, 491-501 (2019).

928

929

930 (2) I am also disagree with the statement that the Late Cretaceous-Paleogene sediments in  
931 Simao Basin is still marine facies. The sediments have been terrestrial since late Jurassic.

932 **Reply:** Thanks again, this appears to be a misunderstanding. As mentioned by reviewer, late  
933 Cretaceous–early Paleogene red beds in the Simao–Khorat Basins have been consistently  
934 interpreted as deposits of the alternating fluvial–lacustrine environments under continental  
935 setting (e.g., Chen et al., 2017; Yan et al., 2021). However, variable-thickness evaporate  
936 intervals (e.g., anhydrite, gypsum, sylvite, and halite) are commonly sandwiched in these late  
937 Cretaceous–early Paleogene terrestrial red beds in these basins. Although discussion still  
938 persists, published datasets on sedimentology proxies, biomarkers, element geochemistry, and  
939 isotopic geochemistry consistently indicate that late Cretaceous to early Paleogene evaporites  
940 are mainly of marine origin (see Figure 6 in Zhang et al., 2013), which has generally been  
941 interpreted as the result of a transgression of the Tethys ocean (e.g., Hite and Japakasetr, 1979;  
942 El Tabakh et al., 1999; Zhang et al., 2013; Liu et al., 2018; Qin et al., 2020; Wang et al., 2021;  
943 Rattana et al., 2021). This suggests that the Simao–Khorat Basins was very close to the ocean  
944 and at a relatively low elevation (near sea level) at that time.

945 In Borneo south of Khorat, a Mississippi- or Amazon- scale submarine fan system  
946 persisted from the late Cretaceous to early Cenozoic, a requirement that can be satisfied by an  
947 ancient transcontinental river. For details see our response to the comment by the Reviewer #1  
948 above (**Lines 748–779** in this letter).

#### 949 **References**

- 951 Chen, Y., Yan, M., Fang, X., Song, C., Zhang, W., Zan, J. et al. Detrital zircon U-Pb geochronological  
952 and sedimentological study of the Simao Basin, Yunnan: Implications for the early Cenozoic  
953 evolution of the Red River. *Earth Planet. Sci. Lett.* **476**, 22–33 (2017).
- 954 El Tabakh, M., Utha-Aroon, C. & Schreiber, B.C. Sedimentology of the Cretaceous Maha Sarakham  
955 evaporites in the Khorat Plateau of northeastern Thailand. *Sediment. Geol.* **123**, 31–62 (1999).
- 956 Galin, T., Breiffeld, H. T., Hall, R., Sevastjanova, I. Provenance of the Cretaceous–Eocene  
957 RajangGroup submarine fan, Sarawak, Malaysia from light and heavy mineral assemblages and U-Pb  
958 zircon geochronology. *Gondwana Research* **51**, 209–233 (2017).
- 959 Hite, R.J. & Japakasetr, T. Potash deposits of Khorat Plateau, Thailand and Laos. *Econ. Geol.* **74**, 448–  
960 458 (1979).
- 961 Liu, C.L., Wang, L.C., Yan, M.D., Zhao, Y.J., Cao, Y.T., Fang, X.M., Shen, L.J., Wu, C.H., Lv, F.L. &  
962 Ding, T. The Mesozoic–Cenozoic tectonic settings, paleogeography and evaporitic sedimentation of  
963 Tethyan blocks within China: implications for potash formation. *Ore Geol. Rev.* **102**, 406–425  
964 (2018).
- 965 Rattana, P., Choowong, M., He, M.-Y., Tan, L., Lan, J., Bissen, R., Chawchai, S., Geochemistry of  
966 evaporitic deposits from the Cenomanian (Upper Cretaceous) Maha Sarakham Formation in the  
967 Khorat Basin, northeastern Thailand. *Cretaceous Research*, in press (2021).
- 968 Qin, Z., Li, Q., Zhang, X. G., Fan, Q. S., Wang, J. P., Du, Y. S., Ma, Y. Q., Wei, H. C., Yuan, Q. &  
969 Shan, F. S. Origin and recharge model of the late cretaceous evaporites in the khorat plateau. *Ore*  
970 *Geol Rev.* **116**, 103226 (2020).
- 971 Wang, L. C., Zhong, Y. S., Xi, D. P., Hu, J. F. & Ding, L. The Middle to Late Cretaceous marine  
972 incursion of the Proto-Paratethys sea and Asian aridification: A case study from the Simao-Khorat  
973 salt giant, southeast Asia. *Palaeogeogr Palaeoclimatol Palaeoecol.* **567**, 110300 (2021).
- 974 Yan, M. D., Zhang, D. W., Fang, X. M., Zhang, W. L., Song, C. H et al. New Insights on the age of the  
975 Mengyejing formation in the Simao basin, SE Tethyan domain and its geological implications.  
976 *Sci China Earth Sci.* **64**, 231–252 (2021).
- 977 Zhang, X.Y., Ma, H.Z., Ma, Y.Q., Tang, Q.L. & Yuan, X.L. Origin of the late Cretaceous  
978 potash-bearing evaporites in the Vientiane Basin of Laos:  $\delta^{11}\text{B}$  evidence from borates. *J. Asian*  
979 *Earth Sci.* **62**, 812–818 (2013).

980  
981  
982  
983  
984  
985  
986  
987  
988  
989  
990  
991  
992  
993  
994  
995  
996  
997  
998  
999  
1000  
1001  
1002  
1003  
1004  
1005  
1006  
1007  
1008  
1009  
1010  
1011  
1012  
1013  
1014  
1015  
1016  
1017  
1018  
1019  
1020  
1021  
1022  
1023  
1024  
1025  
1026

(3) Second, I am not expert to modeling, so cannot judge the reliability of the modeling results to support a low relief at sea level before Eocene. But I am curious even there is a continental scale river flow to the Neo-Tethys Ocean, why must be a low relief existed?

**Reply:** Continental-scale drainage system’s longevity in essentially the same path is sustained by the persistence of a stable topographic gradient related to intercontinental setting and lithospheric-scale tectonics (Shephard et al., 2010; Faccenna et al., 2019; Morón et al., 2019). Long-lived large-scale river systems such as the Mississippi and Amazon are major agents for the formation of low-relief landscapes in stable continental interiors. How such low-elevation landscapes with their embedded rivers respond to tectonic deformation and mountain building is of crucial importance for the evolution of continental drainage networks and for reconstructing uplift patterns during continental collision and plateau formation.

Just as the comment from Reviewer #4, “*the key scientific question that this paper addresses is the origin of the widespread, high-altitude, low-relief surfaces that characterize much of the SE Tibetan Plateau: a region where local relief at present is typically quite high, with deeply incised river gorges, and rock-uplift rates are rapid in a global context. The presence of these long-lived, low-relief surfaces at rather high altitudes has long piqued our curiosity: why are they there; how did they form; what are modern analogues of their formative sequence; what data can be used to test various hypotheses?*” And the most significant and novel finding of our study is to link the development and extent of this long-lived paleo-river system to the formation of the low-relief landscape in eastern Tibet before Cenozoic uplift and plateau growth. Specifically, the existence of a large river system that persisted for tens of millions of years intrinsically reflects a prolonged period of tectonic stability, a long-wavelength dynamic topography, and a relatively stable base level. More significantly, the relatively stable base level and long-term tectonic stability required for the maintenance of this large-scale river played a central role in the development of a low-relief region in the continental interior, similar to the formation of modern low-relief landscape in central Australia and Mongolia (Stewart et al., 1986; Jolivet et al., 2007).

Again, as commended by Reviewer #4, “*this provocative, innovative synthesis and interpretation provides a potential resolution to a long-standing problems related to how there low-relief, high-elevation surfaces in SE and Eastern Tibet developed. I believe it is worthwhile to get this data set and interpretation “out there” for the interested audience to contemplate and to try to test with new data or reanalysis.*” Moreover, our findings are also of fundamental importance for understanding the relationship between fluvial morphology and topographic signatures and bear implications for future studies investigating the overarching mechanism of surface uplift and landscape evolution.

**References**

Faccenna, C., Glišović, P., Forte, A. et al. Role of dynamic topography in sustaining the Nile River over 30 million years. *Nature Geosci.* **12**, 1012–1017 (2019).  
Jolivet, M., Ritz, J. F., Vassallo, R., Larroque, C., Braucher, R., Todbileg, M. et al. Mongolian summits: an uplifted, flat, old but still preserved erosion surface. *Geology* **35**, 871–874 (2007).  
Morón, S., Cawood, P. A., et al. Long-lived transcontinental sediment transport pathways of East Gondwana. *Geology* **47**, 513–516 (2019).  
Shephard, G., Müller, R., Liu, L. et al. Miocene drainage reversal of the Amazon River driven by plate–mantle interaction. *Nature Geosci.* **3**, 870–875 (2010).  
Stewart, A. J., Blake, D. H. & Ollier, C. D. Cambrian river terraces and ridgetops in central Australia: Oldest persisting landforms? *Science* **233**, 758–761 (1986).



1027 (4) Third, in recent studies, Clift et al. (2020) and Zheng et al. (2021) shown that, the Gonjo,  
1028 Jianchuan, Yuanjiang, and the Northern Vietnam basins have similar provenance in the early  
1029 Cenozoic, which supporting a southward-flowing river from eastern Tibet to the South China  
1030 Sea. This is contrast with the figure as suggested in this manuscript. I am wandering how the  
1031 authors reconcile this inconsistency.

1032 **Reply:** As reviewer #3 points out correctly, based on regional similarities of provenance  
1033 signature from a series of sedimentary basins, several recent studies including Clift et al.,  
1034 (2020), Zheng et al., (2021), and He & Zheng et al., (2021) consistently suggest that a  
1035 paleo-Jinsha River flowed south to the South China Sea from the SE Tibetan Plateau  
1036 following the initial surface uplift of eastern Tibet in the late Eocene (ca. 35 Ma) (see Figure  
1037 14 in Clift et al., 2020). Yet our proposed continental-scale fluvial system of this study existed  
1038 during late Cretaceous to early Palaeogene (ca. 100–50 Ma), predating the India–Eurasia  
1039 collision and plateau uplift. Thus, there is no contradiction between the two asynchronous  
1040 drainage models.

1041 If these interpretations hold, the discrepancy in the drainage pattern before and after  
1042 plateau uplift would require a river reorganization event that synchronized with a regional  
1043 tectonic-geomorphological transformation that involved synchronous basin development  
1044 (Jackson et al., 2018; Li et al., 2020), tectonic uplift (e.g., Hoke et al., 2014; Li et al., 2015),  
1045 latitudinal crustal shortening (Tong et al., 2017; Todrani et al., 2020), and faulting activities  
1046 during the late Eocene (e.g., Wang et al., 2012; Zhang et al., 2016). Also, this reorganization  
1047 event may be related to a change in deformation rate and style along the Ailao Shan–Red  
1048 River fault system at ~35 Ma (Scharer, 1994; Gilley et al., 2013), which could set up the  
1049 template for sediment routing that along the Ailao Shan–Red River fault system as shown by  
1050 the Figure 14 in Clift et al., (2020).

## 1051 **References**

- 1052 Clift, P. D., Carter, A., Wysocka, A., Van Hoang, L., Zheng, H., & Neubeck, N. A Late Eocene-  
1053 Oligocene through-flowing river between the Upper Yangtze and South China Sea. *Geochemistry,*  
1054 *Geophysics, Geosystems*, **21**, e2020GC009046 (2020).
- 1055 He, M., Zheng, H., Clift, P. D., Bian, Z., Yang, Q., Zhang, B., & Xia, L. Paleogene sedimentary  
1056 records of the paleo-Jinshajiang (Upper Yangtze) in the Jianchuan Basin, Yunnan, SW China.  
1057 *Geochemistry, Geophysics, Geosystems*, **22**, e2020GC009500 (2021).
- 1058 Hoke, G. D., Liu-Zeng, J., Hren, M. T., Wissink, G. K. & Garzzone, C. N. Stable isotopes reveal high  
1059 southeast Tibetan Plateau margin since the Palaeogene. *Earth Planet. Sci. Lett.* **394**, 270–278  
1060 (2014).
- 1061 Gilley, L. D., T. M. Harrison, P. H. Leloup, F. J. Ryerson, O. M. Lovera, and J.-H. Wang, Direct dating  
1062 of left-lateral deformation along the Red River shear zone, China and Vietnam. *J. Geophys. Res.*  
1063 **108 (B2)**, 2127 (2003).
- 1064 Jackson, W. T., Jr., Robinson, D. M., Weislogel, A. L., Jian, X., & McKay, M. P. Cenozoic  
1065 development of the nonmarine Mula basin in the Southern Yidun terrane: Deposition and  
1066 deformation in the eastern Tibetan Plateau associated with the India-Asia collision. *Tectonics* **37**,  
1067 2446–2465 (2018).
- 1068 Li, S., Su, T., Spicer, R. A., Xu, C., Sherlock, S., Halton, A., et al. Oligocene deformation of the  
1069 Chuandian terrane in the SE margin of the Tibetan Plateau related to the extrusion of Indochina.  
1070 *Tectonics* **39**, e2019TC005974 (2020).
- 1071 Li, S., Currie, B. S., Rowley, D. B., & Ingalls, M. Cenozoic paleoaltimetry of the SE margin of the  
1072 Tibetan Plateau: constraints on the tectonic evolution of the region. *Earth Planet. Sci. Lett.* **432**,  
1073 415–424 (2015).
- 1074 Scharer, U., Z. Lian-Sheng, and P. Tapponnier, Duration of strike-slip movements in large shear zones:  
1075

- 1076 The Red River belt, China. *Earth Planet. Sci. Lett.* **126**, 379–397 (1994).  
1077 Toderani, A., Zhang, B., Speranza, F., & Chen, S. Paleomagnetism of the middle Cenozoic Mula Basin  
1078 (East Tibet): Evidence for km-scale crustal blocks rotated by midlower crust drag. *Geochemistry,*  
1079 *Geophysics, Geosystems*, **21**, e2020GC009225 (2020).  
1080 Tong, Y., Yang, Z., Mao, C., Pei, J., Pu, Z., Xu, Y., 2017. Paleomagnetism of Eocene red-beds in the  
1081 eastern part of the Qiangtang Terrane and its implications for uplift and southward crustal  
1082 extrusion in the southeastern edge of the Tibetan Plateau. *Earth Planet. Sci. Lett.* **475**, 1–14.  
1083 Wang, E., Kirby, E., Furlong, K. P., van Soest, M., Xu, G., Shi, X., Kamp, P. J. J. & Hodges, K. V.  
1084 Two-phase growth of high topography in eastern Tibet during the Cenozoic. *Nature Geosci.* **5**,  
1085 640–645 (2012).  
1086 Zhang, H. P., Oskin, M. E., Liu-Zeng, J., Zhang, P. Z., Reiners, P. W. & Xiao, P. Pulsed exhumation of  
1087 interior eastern Tibet: implications for relief generation mechanisms and the origin of  
1088 high-elevation planation surfaces. *Earth Planet. Sci. Lett.* **449**, 176–185 (2016).  
1089 Zheng, H. B., Clift, P. D., He, M. Y., et al. Formation of the First Bend in the late Eocene gave birth to  
1090 the modern Yangtze River, China. *Geology* **49**, 35–39 (2021).

1091

1092

### 1093 **Reviewer #4**

1094 Review of “*Existence of a continental-scale river system in eastern Tibet during the late*  
1095 *Cretaceous–early Palaeogene*”

1096 I am assessing this paper on the basis of its integrated regional data, its innovative  
1097 interpretations, and the potential impact of those interpretations on our understanding of some  
1098 large-scale geomorphic anomalies along the eastern and SE margin of the Tibetan Plateau.  
1099 This approach likely stands in contrast to some other reviewers who are more familiar with  
1100 details of the local geologic-stratigraphic-petrographic-chronologic data sets that this  
1101 submission exploits and builds upon. The key scientific question that this paper addresses is  
1102 the origin of the widespread, high-altitude, low-relief surfaces that characterize much of the  
1103 SE Tibetan Plateau: a region where local relief at present is typically quite high, with deeply  
1104 incised river gorges, and rock-uplift rates are rapid in a global context. The presence of these  
1105 long-lived, low-relief surfaces at rather high altitudes has long piqued our curiosity: why are  
1106 they there; how did they form; what are modern analogues of their formative sequence; what  
1107 data can be used to test various hypotheses?

1108 The authors argue that, despite some coeval tectonic uplift, a long-lived, ~north-to-south  
1109 river system in eastern Tibet during Late Cretaceous to Paleogene times created abundant,  
1110 low-relief surfaces during a time of relative stability (or in the face of ongoing, but slow rock  
1111 uplift) prior to the Indo-Aisan collision and the main Himalayan orogeny. The authors support  
1112 this scenario by comparing different data sets from these terranes: contrasts in cooling  
1113 histories from the proposed river corridor (versus the bounding terranes); contrasts in detrital  
1114 mineral compositional abundances and U/Pb zircon cooling ages within the “drainage  
1115 corridor” versus outside of it; mixing models that optimize inputs from diverse source areas in  
1116 order to “match” the observed age abundances; etc.

1117 The cooling histories of the compiled thermochronological records (Figure 1b) make a  
1118 rather persuasive case that slow Late Cretaceous to Early Tertiary cooling in Songpan-Garzi  
1119 and Yidun terranes contrasts markedly with the regions of significantly more rapid Late  
1120 Cretaceous-Early Tertiary cooling to the east and west of these terranes. Hence, while  
1121 considerable rock uplift, erosion, and bedrock cooling was going on to the east and west.  
1122 during Late Cretaceous to Paleogene times, this north-south corridor in eastern Tibet appears

1123 quite stable. To support their interpretation of an integrated fluvial system draining southward  
1124 to the Neotethyan ocean, the authors combine paleocurrent analysis with detrital mineralogy  
1125 and detrital zircon U/Pb cooling ages to show a noteworthy consistency among dated  
1126 sampling sites spanning ~600 km from north to south along the proposed fluvial corridor. For  
1127 me, the match between (i) the detrital zircon ages from the Songpan-Ganzi and Yidun terranes  
1128 (proposed source areas in the north) with (ii) the suite of consistent detrital zircon ages from  
1129 depositional basins spanning 600-750 km from north to south provides critical support to their  
1130 hypothesized drainage basin geometry and the proposed timing of its existence as an  
1131 integrated depositional system. To me, this spatial-temporal consistency is a key factor  
1132 supporting the interpretation offered by these authors.

1133 I suspect that, for some readers, examination of the extensive supplementary data will be  
1134 needed to convince them of the validity of the authors' hypotheses. I find both (1) their multi-  
1135 dimensional scaling plots of detrital data sets and potential source areas and (2) their modeled  
1136 relative contributions from potential source areas quite persuasive.

1137 I note that previous reviews brought up many specific issues and questions, commonly  
1138 related to the characteristics of a given source area and an alternative interpretation. I am not  
1139 qualified to judge the merits (or validity) of these objections. But, I did find that this  
1140 contribution's authors gave quite convincing justifications for their choices and interpretations.  
1141 Overall, this provocative, innovative synthesis and interpretation provides a potential  
1142 resolution to a long-standing problems related to how there low-relief, high-elevation surfaces  
1143 in SE and Eastern Tibet developed. I believe it is worthwhile to get this data set and  
1144 interpretation "out there" for the interested audience to contemplate and to try to test with new  
1145 data or re-analysis. I also think that the "problem" that this paper addresses is a long-standing  
1146 and puzzling one: a problem that has come into clearer focus in recent decades as (i)  
1147 high-resolution digital topography has become available of even remote or restricted areas  
1148 (thereby enabling clear topographic syntheses, comparisons across regions, and identification  
1149 of "anomalies") and (ii) as high-resolution, low-cost, and high-throughput analytical  
1150 techniques have enable thousands of analyses to be made and synthesized, and (iii) as  
1151 improved and diversified numerical modeling approaches have enabled more rigorous  
1152 evaluation of hypotheses. This contribution from the edge of Tibet exploits all of these  
1153 technologies in a creative synthesis that is sure to inspire (and provoke) further research  
1154 focused on the evolution of large-scale dynamic orogens

1155 **Reply:** We sincerely thank reviewer for his/her positive and constructive comments about our  
1156 work. We have revised the manuscript based on the reviewer' comments and suggestions.

1157 Note to editors/authors: I show my "linguistic/grammatical/clarification" suggestions below  
1158 in red text.

1159 58 Note that the Yangtze River is not identified / labelled in any figure that I could find!

1160 **Reply:** Thanks, "the Yangtze River" has been labeled in Fig. 1a.

1161 99 "comprise" means" to be composed of" So eastern Tibet comprises these provinces, not  
1162 the other way around.

1163 **Reply:** Yes, it is our original idea that eastern Tibet comprises these provinces (e.g.,  
1164 Songpan-Ganzi and Yidun terranes).

1165 119 with sustained topography topographic relief

1166 **Reply:** Correction has been made in the revised manuscript.

1167 120 SUCH regional differences in erosion/exhumation rates could be explained by a  
1168 **Reply:** Correction has been made in the revised manuscript.  
1169 127 along the foredeep depozone (i.e., SW Sichuan, Xichang, Huili, and Chuxiong basins: Fig.  
1170 1a)

1171 **Reply:** Correction has been made in the revised manuscript.  
1172 139-41 Several meters to tens of meters “Thick, cross-stratified sandstone beds with cross-  
1173 stratification represent channel deposits of southward-flowing, low-energy (“energy” or  
1174 “gradient”?) rivers and associated floodplains, and/or exorheic lakes. I don’t think that  
1175 crevasse splays or lake deposits should be cited as indicative of overall paleocurrent  
1176 directions for large river systems, especially for thick sandstone deposits. What indicates that  
1177 these rivers are “low-energy”? Are there complete channel cross sections and longitudinal  
1178 sections to enable you to deduce “energy” versus gradient or simply associated grain size?

1179 **Reply:** Thanks for this valuable comment. We have reorganized this paragraph (revised  
1180 manuscript, lines 135–145). Grain size of late Cretaceous–early Palaeogene fluvial deposits  
1181 generally ranges from fine to coarse sand, and only a few thin, clast-supported conglomerate  
1182 layers were locally found. Cross-beddings within sandstone bodies are commonly low- angle.  
1183 More importantly, finer facies including floodplains, lacustrine, and crevasse splays are  
1184 widespread in studied basins (Fig. R1). These observations appear to testify to low-energy  
1185 current-driven sedimentation. But honestly, we have not done targeted sedimentological work  
1186 (e.g., detailed analysis of outcrop architecture) to deduce “energy” of river flow, thus  
1187 the “low-energy” is not mentioned in the revised manuscript.

1188 The paleocurrent orientations presented this study were primarily determined from  
1189 cross-stratified sandstones and ripple beddings within fluvial sandstone units (please see Deng  
1190 et al., 2018). Moreover, a dominantly southward paleo-flow direction has also been revealed  
1191 by limited pebbly sandstones and conglomerate of basal granule lag from late Cretaceous  
1192 fluvial deposits in the Chuxiong Basin (Xue et al., 2019), further supporting an existence of a  
1193 south-flowing palaeo-drainage system.

#### 1194 **References**

1195 Xue C, D., Xiang K., Hu, T. Y., et al. Sedimentary Environments of Late Cretaceous Ore-bearing  
1196 Sequences at the Guihua Copper Ore Field in the Northern Chuxiong Basin, Yunnan Province, SW  
1197 China. *Acta Sedimentologica Sinica*, **37**, 491-501 (2019). doi: 10.14027/j.issn.1000-0550.2018.153  
1198 148 “Leshan section” in the Sichuan Basin, (given that the Leshan section is not identified in  
1199 the figure.

1200 **Reply:** In Fig. 1a, the abbreviation of “LS” represents “Leshan section” (please see caption of  
1201 Fig. 1). Please note that we used the “Leshan area” instead of the “Leshan section” in the  
1202 revised manuscript.

1203 164 “genuine”?? Does this mean “statistically significant”?

1204 **Reply:** Yes, correction has been made in the revised manuscript as reviewer' suggestion.

1205 173-5 “The consistent provenance signal from the different basins requires the existence of a  
1206 continuous fluvial system during the late Cretaceous–early Palaeogene.” Does it  
1207 truly “require”? That may well be the most likely scenario, but it doesn’t “require” this  
1208 scenario, in my opinion.

1209 **Reply:** We agree with the comment on the use of “require”, and replace it with “argue for”  
1210 (revised manuscript, line 205).

1211 367 showing main tectonic units “(red text)” (in reference to what represents these units in the

1212 figure) and major river systems (except for the Yangtze! Add a label for this river!)

1213 **Reply:** Thank you for this helpful comment. Correction of caption has been made in the  
1214 revised manuscript as reviewer' suggestion; and “the Yangtze River” has been labeled in Fig.  
1215 1a.

1216 370 low-relief plateau areas 24, 31–34, 36, 58. New suggested text: Hexagons indicate sites  
1217 with Cretaceous-Tertiary cooling histories (shown in 1B) Dashed

1218 **Reply:** This helpful sentence has been added in the revised manuscript, as suggested by  
1219 reviewer.

1220 Comments on Figures

1221 Figure 1a. Nowhere is the Yangtse River labeled on this figure. Its name should be clearly  
1222 identified. Note that in the figure caption, no description is given of the light blue vertical  
1223 band from 40-50 Ma in Fig 1b. What is that? I presume it’s a proposed “boundary” between  
1224 rapid L Cret-Paleocene cooling versus post-50-Ma rapid cooling. Why not add blue or red  
1225 labels for rapid cooling pre-50 Ma and post-40 Ma, respectively? I also note that the chosen  
1226 level of transparency of some of the “yellow” low-relief surfaces makes these surfaces appear  
1227 to be a different color (more orange than yellow, where superimposed above the orange  
1228 swath), and that there is a strange (inconsistent?) mix of yellow and orange surfaces just  
1229 above the red “5” in the figure. These issues should all be readily corrected. Could a label be  
1230 added to the orange region so that it’s more self-explanatory? Similarly, a label on the  
1231 blue-dashed line (“hypothesized drainage divide”) would make its significance more obvious.

1232 **Reply:** The reviewer brings up some important points. As suggested by reviewer, (i) “the  
1233 Yangtze River” has been labeled in Fig. 1a; (ii) the meaning/definition of light blue vertical  
1234 band has been included in revised caption of Fig. 1; (iii) the color of low-relief surfaces  
1235 (yellow) within late Triassic to early Cretaceous foredeep depozone (orange) has  
1236 appropriately been adjusted; (iv) in order to make its significance more obvious, we also  
1237 added labels of “hypothesized drainage divide” and “late Triassic to early Cretaceous foredeep  
1238 depozone” on the modified Fig. 1b.

1239 Figure 1b. Add a legend indicating blue lines for rapid cooling prior to 50 Ma, versus red lines  
1240 for rapid cooling since 50 Ma.

1241 **Reply:** The legend showing definitions of blue and red lines has been added in Fig. 1b.

1242 Figure 2. How about helping your readers along with a title box, “Drainage Scenarios” and  
1243 cryptic summary titles for each scenario’s panel?

1244 **Reply:** Thank you for this valuable comment, succinct summary titles for four scenario’s  
1245 panels have been added in Fig. 2.

1246 Figure 3. The rationale is unstated for the red and blue lines for the probability density  
1247 functions. Please make that clear!

1248 **Reply:** We have expressed rationale of the red and blue lines for the probability density  
1249 functions.

1250 Comments on Supplemental Figures

1251 Supp Figure 3. Illustrative and quite compelling figure!! Spell out the names of the sections  
1252 (CX, HL, etc) for each group of samples.

1253 **Reply:** As suggested by reviewer, full names of each studied basin/area were presented.

Reviewers' Comments:

Reviewer #2:

Remarks to the Author:

Dear Editor,

At your request, I revisited the concerns of Reviewer 1 and the authors' rebuttal relating to comments 5, 6, and 15. For all three of the comments, I consider the authors' responses sufficient and sound.

In comment 5, Reviewer 1 raises concerns with biostratigraphic dating techniques and argues that MDAs from DZs should be used instead. This is supported by reference to another study in which there was disagreement and DZ data more closely approximated the true depositional age. I agree with the authors' rebuttal, which argued that the lack of young DZ ages justified their reliance on biostratigraphic data. I found that the justification for the age interpretations in the supplementary files was thorough, transparent, and appropriately referenced. Furthermore, the provenance interpretations made by the authors explain why there is a lack of DZ ages that approximate the true depositional age. My personal experience working with DZ data tells me that MDAs are often in disagreement with the TDA, even when large-n datasets are used. This is mainly a function of the tectonic setting, not the number of analyses.

In comment 6, Reviewer 1 implies that the authors should conduct large-n DZ dating (300 or more analyses) so that DZ data could be used to calculate MDAs. This comment implies that the authors missed the younger age components because they only dated ~100-150 grains per sample. I disagree with Reviewer 1 in this case. According to Vermeesch (2004), DZ studies can be 95% confident that no population of grains constituting 5% or more of the source was missed when a threshold of 117 analyses is achieved. The authors generally met this requirement, indicating that if there were young populations that were missed, they were likely a minor source (<5%). Furthermore, the authors dated several different samples, most of which yielded very similar results. The probability that the young population was missed in each of the datasets would be much less than 5%. Finally, the authors compiled some data from the literature, bringing the number of grains for the composite sample datasets to >300 in most cases.

In comment 13, Reviewer 1 requested weighted mean ages for the standards so that results from this study can be compared to standard ages. The authors sufficiently addressed this request and comparison indicates the data are of high precision and accuracy.

Respectfully,

Dr. Andrew K Laskowski

Reviewer #3:

Remarks to the Author:

The authors provided a detailed response to my previous comments, but unfortunately, I am not fully convinced by the authors in two aspects.

First, the authors presented some evidence to support a fluvial origin of the deposit in the studied basins, but those sedimentary structures could also develop in shallow lake or floodplain environment, which do not require a perennial river as the author suggested.

Second, regarding the southward-flowing river to the South China Sea (Clift et al., 2020) or to the Neo-Tethyan Ocean (This study), the authors' response is that "a paleo-Jinsha River flowed south to the South China Sea from the SE Tibetan Plateau following the initial surface uplift of eastern Tibet in

the late Eocene (ca. 35 Ma) (Fig. R15). Yet our proposed continental-scale fluvial system of this study existed during late Cretaceous to early Paleogene (ca. 100–50 Ma), predating the India–Eurasia collision and plateau uplift.” And therefore no contradiction between each other. However, this argument largely relies on the reliability of the “late Cretaceous-early Paleogene” age of the studied basins. I understand the difficulty to precisely constrain the age of these red bed basins, and I acknowledge that the authors have tried their best to constrain the age of these basins, but as acknowledged by the authors, the exact ages of these deposits are not yet known, and we cannot preclude the possibility that the deposits in the basins, e.g., Huili, Xichang, can extend into late Eocene. If this was the case, then the southward-flowing river from the Sichuan basin would join the paleo-Red River to the South China Sea as Clark et al. (2004) suggested.

At last, I am also curious what is the difference between “a dendritic paleo-Red River to the South China Sea” and “a continental-scale paleo-drainage system to the Neo-Tethyan Ocean” on the formation of a low-relief landscape?

Reviewer #4:

Remarks to the Author:

Review of “Existence of a continental-scale river system in eastern Tibet during the late Cretaceous–early Palaeogene”

I am assessing this paper on the basis of its integrated regional data, its innovative interpretations, and the potential impact of those interpretations on our understanding of some large-scale geomorphic anomalies along the eastern and SE margin of the Tibetan Plateau. This approach likely stands in contrast to some other reviewers who are more familiar with details of the local geologic-stratigraphic-petrographic-chronologic data sets that this submission exploits and builds upon. The key scientific question that this paper addresses is the origin of the widespread, high-altitude, low-relief surfaces that characterize much of the SE Tibetan Plateau: a region where local relief at present is typically quite high, with deeply incised river gorges, and rock-uplift rates are rapid in a global context. The presence of these long-lived, low-relief surfaces at rather high altitudes has long piqued our curiosity: why are they there; how did they form; what are modern analogues of their formative sequence; what data can be used to test various hypotheses?

The authors argue that, despite some coeval tectonic uplift, a long-lived, ~north-to-south river system in eastern Tibet during Late Cretaceous to Paleogene times created abundant, low-relief surfaces during a time of relative stability (or in the face of ongoing, but slow rock uplift) prior to the Indo-Aisan collision and the main Himalayan orogeny. The authors support this scenario by comparing different data sets from these terranes: contrasts in cooling histories from the proposed river corridor (versus the bounding terranes); contrasts in detrital mineral compositional abundances and U/Pb zircon cooling ages within the “drainage corridor” versus outside of it; mixing models that optimize inputs from diverse source areas in order to “match” the observed age abundances; etc.

The cooling histories of the compiled thermochronological records (Figure 1b) make a rather persuasive case that slow Late Cretaceous to Early Tertiary cooling in Songpan-Garzi and Yidun terranes contrasts markedly with the regions of significantly more rapid Late Cretaceous-Early Tertiary cooling to the east and west of these terranes. Hence, while considerable rock uplift, erosion, and bedrock cooling was going on to the east and west. during Late Cretaceous to Paleogene times, this north-south corridor in eastern Tibet appears quite stable. To support their interpretation of an integrated fluvial system draining southward to the Neotethyan ocean, the authors combine paleocurrent analysis with detrital mineralogy and detrital zircon U/Pb cooling ages to show a noteworthy consistency among dated sampling sites spanning ~600 km from north to south along the proposed fluvial corridor. For me, the match between (i) the detrital zircon ages from the Songpan-Ganzi and Yidun terranes (proposed source areas in the north) with (ii) the suite of consistent detrital zircon ages from depositional basins spanning 600–750

km from north to south provides critical support to their hypothesized drainage basin geometry and the proposed timing of its existence as an integrated depositional system. To me, this spatialtemporal

consistency is a key factor supporting the interpretation offered by these authors.

I suspect that, for some readers, examination of the extensive supplementary data will be needed to convince them of the validity of the authors' hypotheses. I find both (1) their multidimensional

scaling plots of detrital data sets and potential source areas and (2) their modeled relative contributions from potential source areas quite persuasive.

I note that previous reviews brought up many specific issues and questions, commonly related to the characteristics of a given source area and an alternative interpretation. I am not qualified to judge the merits (or validity) of these objections. But, I did find that this contribution's authors gave quite convincing justifications for their choices and interpretations. Overall, this provocative, innovative synthesis and interpretation provides a potential resolution to a long-standing problems related to how there low-relief, high-elevation surfaces in SE and Eastern Tibet developed. I believe it is worthwhile to get this data set and interpretation "out there" for the interested audience to contemplate and to try to test with new data or reanalysis.

I also think that the "problem" that this paper addresses is a long-standing and puzzling one: a problem that has come into clearer focus in recent decades as (i) high-resolution digital topography has become available of even remote or restricted areas (thereby enabling clear topographic syntheses, comparisons across regions, and identification of "anomalies") and (ii) as high-resolution, low-cost, and high-throughput analytical techniques have enable thousands of analyses to be made and synthesized, and (iii) as improved and diversified numerical modeling approaches have enabled more rigorous evaluation of hypotheses. This contribution from the edge of Tibet exploits all of these technologies in a creative synthesis that is sure to inspire (and provoke) further research focused on the evolution of large-scale dynamic orogens.

Note to editors/authors: I show my "linguistic/grammatical/clarification" suggestions below in red text.

58 Note that the Yangtze River is not identified/labelled in any figure that I could find!

99 "comprise" means "to be composed of" So eastern Tibet comprises these provinces, not the other way around.

119 with sustained topography topographic relief

120 SUCH regional differences in erosion/exhumation rates could be explained by a

127 along the foredeep depozone (i.e., SW Sichuan, Xichang, Huili, and Chuxiong basins: Fig. 1a)

139-41 Several meters to tens of meters "Thick, cross-stratified sandstone beds with crossstratification

represent channel deposits of southward-flowing, low-energy ("energy" or

"gradient"?) rivers and associated floodplains, and/or exorheic lakes I don't think that

crevasse splays or lake deposits should be cited as indicative of overall paleocurrent directions for large river systems, especially for thick sandstone deposits. What indicates that these rivers are "low-energy"? Are there complete channel cross sections and longitudinal sections to enable you to deduce "energy" versus gradient or simply associated grain size?

148 "Leshan section" in the Sichuan Basin, (given that the Leshan section is not identified in the figure.

164 "genuine"?? Does this mean "statistically significant"?

173-5 "The consistent provenance signal from the different basins requires the existence of a continuous fluvial system during the late Cretaceous-early Palaeogene." Does it truly "require"? That may well be the most likely scenario, but it doesn't "require" this scenario, in my opinion.

367 showing main tectonic units "(red text)" (in reference to what represents these units in the figure) and major river systems (except for the Yangtze! Add a label for this river!)

370 low-relief plateau areas<sup>24,31-34,36,58</sup>. New suggested text: Hexagons indicate sites with Cretaceous-Tertiary cooling histories (shown in 1B) Dashed

Comments on Figures



Figure 1a. Nowhere is the Yangtse River labeled on this figure. Its name should be clearly identified. Note that in the figure caption, no description is given of the light blue vertical band from 40-50 Ma in Fig 1b. What is that? I presume it's a proposed "boundary" between rapid L Cret-Paleocene cooling versus post-50-Ma rapid cooling. Why not add blue or red labels for rapid cooling pre-50 Ma and post-40 Ma, respectively? I also note that the chosen level of transparency of some of the "yellow" low-relief surfaces makes these surfaces appear to be a different color (more orange than yellow, where superimposed above the orange swath), and that there is a strange (inconsistent?) mix of yellow and orange surfaces just above the red "5" in the figure. These issues should all be readily corrected. Could a label be added to the orange region so that it's more self-explanatory? Similarly, a label on the blue-dashed line ("hypothesized drainage divide") would make its significance more obvious.

Figure 1b. Add a legend indicating blue lines for rapid cooling prior to 50 Ma, versus red lines for rapid cooling since 50 Ma.

Figure 2. How about helping your readers along with a title box, "Drainage Scenarios" and cryptic summary titles for each scenario's panel?

Figure 3. The rationale is unstated for the red and blue lines for the probability density functions. Please make that clear!

Comments on Supplemental Figures

Supp Figure 3. Illustrative and quite compelling figure!! Spell out the names of the sections (CX, HL, etc) for each group of samples.

## **Response letter**

In this letter we provide our detailed response (in blue text) to the comments of the three reviewers (in black) and explain all changes performed on the manuscript.

### **Response to the comments of the three reviewers**

#### **Reviewer #2**

Dear Editor,

At your request, I revisited the concerns of Reviewer 1 and the authors' rebuttal relating to comments 5, 6, and 15. For all three of the comments, I consider the authors' responses sufficient and sound. In comment 5, Reviewer 1 raises concerns with biostratigraphic dating techniques and argues that MDAs from DZs should be used instead. This is supported by reference to another study in which there was disagreement and DZ data more closely approximated the true depositional age. I agree with the authors' rebuttal, which argued that the lack of young DZ ages justified their reliance on biostratigraphic data. I found that the justification for the age interpretations in the supplementary files was thorough, transparent, and appropriately referenced. Furthermore, the provenance interpretations made by the authors explain why there is a lack of DZ ages that approximate the true depositional age. My personal experience working with DZ data tells me that MDAs are often in disagreement with the TDA, even when large-n datasets are used. This is mainly a function of the tectonic setting, not the number of analyses.

In comment 6, Reviewer 1 implies that the authors should conduct large-n DZ dating (300 or more analyses) so that DZ data could be used to calculate MDAs. This comment implies that the authors missed the younger age components because they only dated ~100-150 grains per sample. I disagree with Reviewer 1 in this case. According to Vermeesch (2004), DZ studies can be 95% confident that no population of grains constituting 5% or more of the source was missed when a threshold of 117 analyses is achieved. The authors generally met this requirement, indicating that if there were young populations that were missed, they were likely a minor source (<5%). Furthermore, the authors dated several different samples, most of which yielded very similar results. The probability that the young population was missed in each of the datasets would be much less than 5%. Finally, the authors compiled some data from the literature, bringing the number of grains for the composite sample datasets to >300 in most cases.

In comment 13, Reviewer 1 requested weighted mean ages for the standards so that

results from this study can be compared to standard ages. The authors sufficiently addressed this request and comparison indicates the data are of high precision and accuracy.

Respectfully,

Dr. Andrew K Laskowski

**Reply:** We thank Dr. Andrew Laskowski for his detailed comments on the three points. In the “Methods” section, we added the following sentence for clarification: “In this study, all samples from the different basins show consistent detrital zircon components, and each sample yielded 68–123 concordant ages, which generally meets statistical requirements” (lines 349–351 of revised manuscript).

### **Reviewer #3**

The authors provided a detailed response to my previous comments, but unfortunately, I am not fully convinced by the authors in two aspects.

First, the authors presented some evidence to support a fluvial origin of the deposit in the studied basins, but those sedimentary structures could also develop in shallow lake or floodplain environment, which do not require a perennial river as the author suggested.

**Reply:** Indeed, sedimentary structures such as small-scale cross stratifications or climbing ripple lamination can also be observed in siltstone to mudstone beds of shallow-lacustrine or floodplain facies. However, the presence of meter to tens of meter thick amalgamated sandstone beds which are laterally continuous over scales of hundreds of meters, indicate a fluvial origin for these sedimentary deposits. Characteristic fluvial sedimentary structures include medium- to large-scale cross stratifications, upward fining sequences, basal granule lags, and lenticular or tabular sandstone beds with erosional contacts. Moreover, paleocurrent directions based on trough and tabular cross-beds are consistently indicating a flow to the south or southeast, further corroborating the existence of a perennial fluvial system. Likewise, the sedimentological descriptions and interpretations of the depositional environment from geological surveys (as summarized in the Supplementary Information) indicate that the fluvial-lacustrine facies associations and the freshwater fossil assemblages of

the studied basins are best interpreted as typical components of a large river system. We re-iterate that hydrologically open lake basins (Carroll and Bohacs, 1999; Bohacs et al., 2000) and floodplains are integral parts of large river systems, as can be seen along the largest rivers of the world (Miall et al., 1996; Chen et al., 2007; Ashworth et al., 2012). These arguments, together with the lack of thick evaporite sequences, make the existence of a large throughgoing river system very likely. As we already addressed this issue in the last revision of the manuscript (lines 135–153 of revised manuscript), we did not make further changes.

### References:

- Ashworth, P. J. & Lewin, J. How do big rivers come to be different? *Earth Sci Rev.* **114**, 84–107 (2012).
- Bohacs, K. M., A. R. Carroll, J. E. Neal, P. J. Mankiewicz. Lake-basin type, source potential, and hydrocarbon character: an integrated-sequence-stratigraphic–geochemical framework, in E. H. Gierlowski-Kordesch and K. R. Kelts, eds., *Lake basins through space and time: AAPG Studies in Geology* 46, p. 3–34 (2000).
- Carroll, A. R., Bohacs, K.M. Stratigraphic classification of ancient lakes: balancing tectonic and climatic controls. *Geology* **27**, 99–102 (1999).
- Chen, Z., Xu, K., Watanabe, M. Dynamic hydrology and geomorphology of the Yangtze River. In: Gupta, A. (Ed.), *Large Rivers: Geomorphology and Management*. Wiley, Chichester, pp. 457–469, (2007).
- Miall, A. D. *The Geology of Fluvial Deposits: Sedimentary Facies, Basin Analysis, and Petroleum Geology*, Springer (1996).

Second, regarding the southward-flowing river to the South China Sea (Clift et al., 2020) or to the Neo-Tethyan Ocean (This study), the authors’ response is that “a paleo-Jinsha River flowed south to the South China Sea from the SE Tibetan Plateau following the initial surface uplift of eastern Tibet in the late Eocene (ca. 35 Ma) (Fig. R15). Yet our proposed continental-scale fluvial system of this study existed during late Cretaceous to early Paleogene (ca. 100–50 Ma), predating the India–Eurasia collision and plateau uplift.” And therefore no contradiction between each other. However, this argument largely relies on the reliability of the “late Cretaceous-early Paleogene” age of the studied basins. I understand the difficulty to precisely constrain the age of these red bed basins, and I acknowledge that the authors have tried their best to constrain the age of these basins, but as acknowledged by the authors, the exact ages of these deposits are not yet known, and we cannot preclude the

possibility that the deposits in the basins, e.g., Huili, Xichang, can extend into late Eocene. If this was the case, then the southward-flowing river from the Sichuan basin would join the paleo-Red River to the South China Sea as Clark et al. (2004) suggested.

**Reply:** As acknowledged by the reviewer, the exact ages of these deposits are difficult to constrain, but young (i.e., late Eocene or younger) zircons are completely lacking in our samples. Given that late Eocene plutons are common across southeastern Tibet (e.g., Lu et al., 2012; Deng et al., 2014), the absence of late Eocene zircon ages implies that the studied continental red-beds are older than late Eocene. Still, we cannot preclude the possibility mentioned by the reviewer that the large-scale river discharged to the Proto-South China Sea at a late stage of the K<sub>2</sub>–E<sub>1</sub> time interval. However, in the current depositional area of the Red River (the Yinggehai-Song Hong Basin of the South China Sea), many boreholes revealed that the Cenozoic deposits at the bottom of the boreholes are not older than late Eocene (~35 Ma) (e.g., Clift et al., 2006, 2008). Regionally, the Proto-South China Sea during the late Cretaceous to early Cenozoic period is characterized by a series of deep, rapidly-subsiding small-scale rift basins that formed during back-arc extension (see review of Morley et al., 2012). This tectonic setting makes it difficult to test the hypothesis suggested by the reviewer. Considering these uncertainties and the reviewer's concern, we added the following sentence to the manuscript (lines 255–259) **“It is also possible that the paleo-drainage network discharged into the Neo-Tethyan Ocean during the late Cretaceous and Palaeocene, but later changed its course as a result of the India-Asia collision, and flowed into the proto-South China Sea starting in late Eocene.”**

#### **References:**

- Clift, P. D., Blusztajn, J. & Nguyen, A. D. Large- scale drainage capture and surface uplift in eastern Tibet- SW China before 24 Ma inferred from sediments of the Hanoi Basin, Vietnam. *Geophys. Res. Lett.* **33**, L19403 (2006).
- Clift, P. D., Long, H. V., Hinton, R., Ellam, R. M., Hannigan, R., Tan, M. T. et al. Evolving east Asian river systems reconstructed by trace element and Pb and Nd isotope variations in modern and ancient Red Rive-Song Hong sediments. *Geochem., Geophys., Geosyst.* **9**, Q04039 (2008).
- Deng, J., Wang, Q. F., Li, G. J. & Santosh, M. Cenozoic tectono-magmatic and metallogenic processes in the Sanjiang region, southwestern China. *Earth-Science Reviews* **138**, 268–299 (2014).

Lu, Y.J., Kerrich, R., Cawood, P.A., McCuaig, T.C., Hart, C.J.R., Li, Z.X., Hou, Z.Q., Bagas, L. Zircon SHRIMP U–Pb geochronology of potassic felsic intrusions in western Yunnan, SW China: constraints on the relationship of magmatism to the Jinsha su-ture. *Gondwana Res.* **22**, 737–747 (2012).

Morley, C.K. Late Cretaceous–Early Palaeogene tectonic development of SE Asia. *Earth Sci Rev.* **115**, 27–75 (2012).

At last, I am also curious what is the difference between “a dendritic paleo-Red River to the South China Sea” and “a continental-scale paleo-drainage system to the Neo-Tethyan Ocean” on the formation of a low-relief landscape?

**Reply:** A dendritic palaeo-Red River to the South China Sea, as suggested by Clark et al. (2004), would be largely controlled by a regionally eastward-tilt of the topography, possibly resulting from plateau uplift. Such a tectonic setting makes it difficult to develop a large-scale low-relief surface. In contrast, our proposed continental-scale paleo-drainage system to the Neo-Tethyan Ocean follows an inherited long-wavelength topographic depression (as explained on lines 105–111 of the revised manuscript), which provides more favourable boundary conditions for the formation of the extensive low-relief landscape.

**Reference:** Clark, M. K., Schoenbohm, L. M., Royden, L. H., Whipple, K. X., Burchfiel, B. C., Zhang, X., Tang, W., Wang, E. & Chen, L. Surface uplift, tectonics, and erosion of eastern Tibet from large-scale drainage patterns. *Tectonics* **23**, TC1006 (2004).

#### **Reviewer #4**

Review of “*Existence of a continental-scale river system in eastern Tibet during the late Cretaceous–early Palaeogene*”.

**Reply:** As explained in the Cover Letter, the comments we received from Reviewer #4 were those of the last round of reviews. We believe that we satisfactorily addressed these comments in our last revision and did therefore not change anything in this current revision of the manuscript.
