# Supplementary material for: Existence of a continental-scale river system in eastern Tibet during the late Cretaceous–early Palaeogene
Source: PubMed Central journal article supplement (PMC8668954; doi:10.1038/s41467-021-27587-9), 2021-12-13
Supplement: 41467_2021_27587_MOESM3_ESM.pdf [file 41467_2021_27587_MOESM3_ESM.pdf]

## **Description of Additional Supplementary Files**

**File Name:** Supplementary Data 1

**Description:** LA-ICP-MS zircon U-Pb data for all samples.

**File Name:** Supplementary Data 2

**Description:** Dating results of zircon standards.
